# Supplementary material
Source: PubMed Central journal article supplement (PMC2738984)
Supplement: NIHMS116798-supplement-3_si_003.pdf [file NIHMS116798-supplement-3_si_003.pdf]

## Supporting Information

### **The Chiral Crown Conformation of Rh<sub>2</sub>(S-PTTL)<sub>4</sub>: Enantioselective Cyclopropanation with $\alpha$ -Alkyl- $\alpha$ -diazoesters**

Andrew DeAngelis, Olga Dmitrenko, Glenn P. A. Yap, and Joseph M. Fox\*

Brown Laboratories, Department of Chemistry and Biochemistry, University of Delaware, Newark, DE 19716

Computational Details

pp S-2 – S-37

Crystallographic Details

p S-38 – S-45

## Computational Details

Optimizations of large systems were performed using the Amsterdam Density Functional (ADF) program package [1] using the OLYP functional and a TZP (small frozen core) basis set. For small model system optimizations and single-point energy calculations, we applied the B3LYP method with a LANL2DZ basis set and effective core potential on Rh atoms and a 6-31G(d) on the other atoms (Gaussian 03 program [2]). It was previously demonstrated by Davies and Singleton groups [3] for similar Rh-catalyzed cyclopropanation, that this method provides adequate accuracy and geometries. Unfortunately for large transition structures studied in this work, B3LYP Gaussian 03 calculations require too much cpu-time. Thus, we report B3LYP/gen(LANL2DZ, 6-31G(d)) [g03] energy single point calculations using OLYP/TZP(Small)[ADF] optimized geometries.

In preliminary calculations using the OLYP functional and the DZ (large frozen core) basis set, we found a transition state **TS-3** in addition to **TS-1** and **TS-2** (the latter two transition states are described in the main body of the paper). **TS-3** is analogous to **TS-1**, except that the alkene approached the carbenoid from the *Re*-face. We observed close contacts in **TS-3** (3.37 Å from the ethyl ester to a phthalimido group; 3.61 Å from the styrene to a phthalimido group). **TS-3**, shown below, is higher in energy than **TS-1** by 2.96 kcal/mol, and was not considered in higher level calculations.

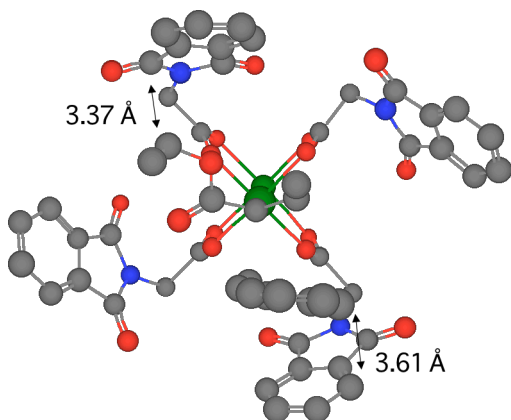

**TS-3**

Conformational searching was performed with a 1000 step Monte Carlo multiple minimum search on  $\text{Rh}_2(\text{S-PTTL})_4$ . The method was PRCG with 500 maximum iterations, with a convergence threshold of 0.050 kJ/mol. The force field was MMFFS with constant dielectric constant (1.0). For the search, the tetracarboxylate core was frozen. The minimum conformation from the search was the chiral crown

conformation. Within 3 kcal/mol of this conformation were two additional conformations. These three lowest energy conformers were subjected to calculations using the OLYP functional and the TZP (small frozen core) basis set.

## References

- [1] ADF2008.01, SCM, Theoretical Chemistry, Vrije Universiteit, Amsterdam, The Netherlands, <http://www.scm.com>
- [2] *Gaussian 03*, revision D.01; M. J. Frisch, G. W. Trucks, H. B. Schlegel, G. E. Scuseria, M. A. Robb, J. R. Cheeseman, J. A. Montgomery, Jr., T. Vreven, K. N. Kudin, J. C. Burant, J. M. Millam, S. S. Iyengar, J. Tomasi, V. Barone, B. Mennucci, M. Cossi, G. Scalmani, N. Rega, G. A. Petersson, H. Nakatsuji, M. Hada, M. Ehara, K. Toyota, R. Fukuda, J. Hasegawa, M. Ishida, T. Nakajima, Y. Honda, O. Kitao, H. Nakai, M. Klene, X. Li, J. E. Knox, H. P. Hratchian, J. B. Cross, V. Bakken, C. Adamo, J. Jaramillo, R. Gomperts, R. E. Stratmann, O. Yazyev, A. J. Austin, R. Cammi, C. Pomelli, J. W. Ochterski, P. Y. Ayala, K. Morokuma, G. A. Voth, P. Salvador, J. J. Dannenberg, V. G. Zakrzewski, S. Dapprich, A. D. Daniels, M. C. Strain, O. Farkas, D. K. Malick, A. D. Rabuck, K. Raghavachari, J. B. Foresman, J. V. Ortiz, Q. Cui, A. G. Baboul, S. Clifford, J. Cioslowski, B. B. Stefanov, G. Liu, A. Liashenko, P. Piskorz, I. Komaromi, R. L. Martin, D. J. Fox, T. Keith, M. A. Al-Laham, C. Y. Peng, A. Nanayakkara, M. Challacombe, P. M. W. Gill, B. Johnson, W. Chen, M. W. Wong, C. Gonzalez, and J. A. Pople, Gaussian, Inc., Wallingford CT, 2004.
- [3] Daniel T. Nowlan III, Timothy M. Gregg, Huw M. L. Davies, and Daniel A. Singleton. *J. Am. Chem. Soc.*, 2003, 125 (51), pp 15902–15911

## TS-1s (small model):

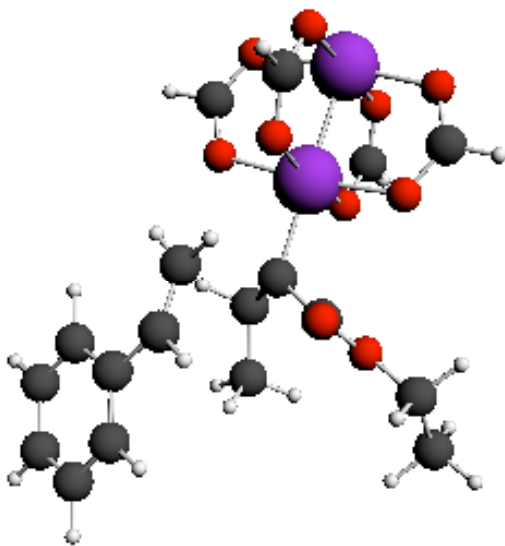

TS1 OLYP/TZP(Small) Energy: -11.29353 Hartree

E(B3LYP/gen(Lanl2dz,6-31G(d))) = -1670.50674402 a.u.

-----  
Symbolic Z-matrix:

Charge = 0 Multiplicity = 1

|    |          |          |          |
|----|----------|----------|----------|
| C  | -0.19597 | 1.86541  | 5.2311   |
| C  | 0.14446  | 1.16914  | 6.41258  |
| C  | -0.8096  | 0.88447  | 7.38283  |
| C  | -2.12912 | 1.31142  | 7.20977  |
| C  | -2.47536 | 2.04983  | 6.07316  |
| C  | -1.52382 | 2.32935  | 5.09828  |
| C  | 0.81529  | 1.99889  | 4.19491  |
| C  | 0.66334  | 2.4012   | 2.89401  |
| H  | 1.16614  | 0.81597  | 6.54001  |
| H  | -0.53017 | 0.31589  | 8.26713  |
| H  | -2.88311 | 1.07357  | 7.95726  |
| H  | -3.49727 | 2.40086  | 5.94563  |
| H  | -1.81303 | 2.90663  | 4.22412  |
| C  | 0.3775   | 0.39404  | 1.73307  |
| C  | 1.6733   | -0.29067 | 2.09782  |
| O  | 2.72385  | 0.25497  | 2.38646  |
| O  | 1.51951  | -1.63766 | 1.9835   |
| C  | 2.68357  | -2.47179 | 2.23696  |
| C  | -0.93903 | -0.10761 | 2.2676   |
| C  | -1.01689 | -1.08586 | 3.45007  |
| C  | 2.19425  | -3.82763 | 2.71325  |
| Rh | 0.32513  | 1.09799  | -0.22796 |
| Rh | 0.09291  | 1.80474  | -2.6131  |
| O  | -1.3822  | 2.27945  | 0.15489  |
| O  | -1.59203 | 2.91389  | -2.03967 |
| O  | -0.91584 | -0.5214  | -0.76708 |
| O  | -1.12668 | 0.14573  | -2.94956 |
| O  | 1.98983  | -0.02155 | -0.85126 |
| O  | 1.77879  | 0.64722  | -3.03941 |
| O  | 1.57604  | 2.77132  | -0.00794 |
| O  | 1.32835  | 3.42954  | -2.18858 |
| C  | -1.92658 | 2.88929  | -0.82391 |
| C  | -1.34361 | -0.61105 | -1.9632  |
| C  | 2.31535  | 0.02165  | -2.08078 |
| C  | 1.78569  | 3.52164  | -1.01557 |
| H  | 1.54847  | 2.59295  | 2.30282  |
| H  | -0.26463 | 2.82527  | 2.52726  |
| H  | 1.81383  | 1.67317  | 4.48315  |
| H  | -2.045   | -1.10886 | 3.82849  |
| H  | -0.36846 | -0.80019 | 4.28024  |
| H  | -0.74724 | -2.09801 | 3.14395  |
| H  | -1.57384 | 0.76623  | 2.45526  |
| H  | -1.42519 | -0.57745 | 1.39965  |
| H  | 3.24814  | -2.55158 | 1.3013   |
| H  | 3.31933  | -1.98127 | 2.97808  |
| H  | 1.66772  | -3.74551 | 3.66979  |
| H  | 3.05031  | -4.49769 | 2.8524   |
| H  | 1.51744  | -4.28595 | 1.98489  |
| H  | 2.46457  | 4.37107  | -0.82406 |
| H  | -2.82208 | 3.47875  | -0.55608 |
| H  | -1.99606 | -1.48166 | -2.15298 |
| H  | 3.20268  | -0.58305 | -2.33998 |

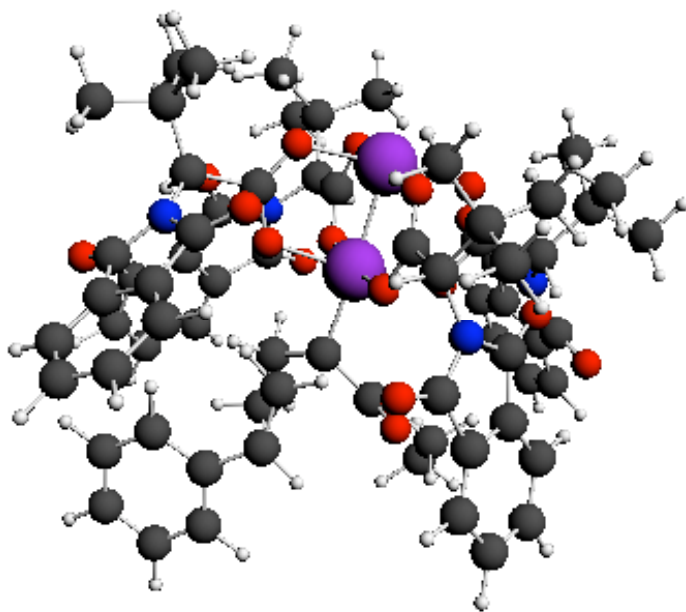

TS-1

E(B3LYP/gen(Lan12dz,6-31G(d))) = **-4504.3094779** a.u.  
 <Feb25-2009> <16:36:23> Bond Energy LDA -39.20170267 a.u.  
 <Feb25-2009> <16:36:23> Bond Energy LDA -1066.73260529 eV  
 <Feb25-2009> <16:36:23> + GGA-X -33.78174242 a.u.  
 <Feb25-2009> <16:36:23> + GGA-X -919.24798300 eV  
 <Feb25-2009> <16:36:23> + **GGA-XC -37.68636456 a.u.**  
 <Feb25-2009> <16:36:23> + GGA-XC -1025.49815731 eV  
 <Feb25-2009> <16:36:23> NORMAL TERMINATION  
 <Feb25-2009> <16:36:34> END  
 <Feb25-2009> <07:41:56> Geometry Converged

Coordinates in Geometry Cycle 5

| Atom | X         | Y         | Z (Angstrom) |
|------|-----------|-----------|--------------|
| 1.C  | -0.270852 | 1.785713  | 5.230033     |
| 2.C  | 0.064997  | 1.064363  | 6.398090     |
| 3.C  | -0.906564 | 0.694824  | 7.322045     |
| 4.C  | -2.239888 | 1.065001  | 7.120356     |
| 5.C  | -2.582693 | 1.831298  | 6.001772     |
| 6.C  | -1.614182 | 2.190141  | 5.070406     |
| 7.C  | 0.757627  | 1.994283  | 4.221070     |
| 8.C  | 0.605320  | 2.400041  | 2.922545     |
| 9.H  | 1.097365  | 0.751379  | 6.546778     |
| 10.H | -0.630488 | 0.100218  | 8.190576     |
| 11.H | -3.005795 | 0.757769  | 7.830101     |
| 12.H | -3.614500 | 2.140712  | 5.845202     |
| 13.H | -1.905818 | 2.779427  | 4.207198     |
| 14.C | 0.404577  | 0.393513  | 1.730765     |
| 15.C | 1.709580  | -0.242222 | 2.123448     |
| 16.O | 2.721840  | 0.341110  | 2.465437     |
| 17.O | 1.618632  | -1.591396 | 1.994089     |
| 18.C | 2.806424  | -2.361173 | 2.322556     |

|       |           |           |           |
|-------|-----------|-----------|-----------|
| 19.C  | -0.882082 | -0.141864 | 2.284308  |
| 20.C  | -0.895252 | -1.107952 | 3.478785  |
| 21.C  | 2.358938  | -3.731567 | 2.793101  |
| 22.Rh | 0.327809  | 1.082170  | -0.239028 |
| 23.Rh | 0.066833  | 1.791624  | -2.599567 |
| 24.N  | -2.640429 | 4.762856  | 0.832031  |
| 25.O  | -0.676657 | 5.723672  | -0.026641 |
| 26.O  | -4.239730 | 4.050055  | 2.393699  |
| 27.C  | -1.479019 | 5.573783  | 0.874173  |
| 28.C  | -1.446884 | 6.177290  | 2.234589  |
| 29.C  | -0.518203 | 7.037342  | 2.802771  |
| 30.C  | -0.753115 | 7.458004  | 4.116429  |
| 31.C  | -1.884422 | 7.027857  | 4.821034  |
| 32.C  | -2.802436 | 6.142251  | 4.244458  |
| 33.C  | -2.554152 | 5.721418  | 2.944641  |
| 34.C  | -3.288547 | 4.751939  | 2.083138  |
| 35.N  | -3.424566 | -1.745185 | -0.788335 |
| 36.O  | -4.248085 | 0.441512  | -0.619504 |
| 37.O  | -2.829035 | -3.934157 | -0.196686 |
| 38.C  | -4.077270 | -0.668238 | -0.152341 |
| 39.C  | -4.482518 | -1.157644 | 1.193103  |
| 40.C  | -5.081295 | -0.470440 | 2.239964  |
| 41.C  | -5.279480 | -1.169961 | 3.435042  |
| 42.C  | -4.895742 | -2.511294 | 3.557115  |
| 43.C  | -4.286831 | -3.191036 | 2.495612  |
| 44.C  | -4.080233 | -2.484302 | 1.317142  |
| 45.C  | -3.372278 | -2.873224 | 0.061094  |
| 46.N  | 3.090334  | -2.480085 | -2.145994 |
| 47.O  | 0.878469  | -2.815550 | -2.858297 |
| 48.O  | 5.107868  | -2.810293 | -0.996317 |
| 49.C  | 1.884860  | -3.201915 | -2.294640 |
| 50.C  | 2.101214  | -4.516235 | -1.629880 |
| 51.C  | 1.240898  | -5.597133 | -1.498764 |
| 52.C  | 1.729833  | -6.729168 | -0.837506 |
| 53.C  | 3.034918  | -6.760583 | -0.329630 |
| 54.C  | 3.886854  | -5.656543 | -0.453463 |
| 55.C  | 3.391077  | -4.537041 | -1.108763 |
| 56.C  | 4.019020  | -3.210257 | -1.376237 |
| 57.N  | 4.175647  | 3.679555  | 0.138222  |
| 58.O  | 4.705737  | 1.758791  | -1.094598 |
| 59.O  | 3.966400  | 5.155551  | 1.944868  |
| 60.C  | 4.748391  | 2.402476  | -0.064154 |
| 61.C  | 5.386858  | 2.019602  | 1.221243  |
| 62.C  | 6.005229  | 0.830128  | 1.578049  |
| 63.C  | 6.439994  | 0.706708  | 2.900817  |
| 64.C  | 6.264238  | 1.750556  | 3.817990  |
| 65.C  | 5.634586  | 2.944550  | 3.445949  |
| 66.C  | 5.191867  | 3.051902  | 2.133577  |
| 67.C  | 4.390430  | 4.117167  | 1.463731  |
| 68.O  | -1.282925 | 2.388019  | 0.183197  |
| 69.O  | -1.488963 | 3.058527  | -1.975354 |
| 70.O  | -1.060143 | -0.437704 | -0.720566 |
| 71.O  | -1.339452 | 0.256614  | -2.859828 |
| 72.O  | 1.891405  | -0.184066 | -0.984595 |
| 73.O  | 1.616862  | 0.513802  | -3.132647 |
| 74.O  | 1.714177  | 2.632417  | -0.036134 |

|       |           |           |           |
|-------|-----------|-----------|-----------|
| 75.O  | 1.528454  | 3.266950  | -2.204943 |
| 76.C  | -1.824388 | 3.060823  | -0.760553 |
| 77.C  | -3.057591 | 3.902149  | -0.293358 |
| 78.C  | -3.956764 | 4.630218  | -1.370141 |
| 79.C  | -5.114179 | 5.341757  | -0.629388 |
| 80.C  | -3.204778 | 5.666320  | -2.230307 |
| 81.C  | -4.595353 | 3.567301  | -2.292800 |
| 82.C  | -1.599235 | -0.488840 | -1.873502 |
| 83.C  | -2.634189 | -1.652918 | -2.031813 |
| 84.C  | -3.451336 | -1.751146 | -3.376108 |
| 85.C  | -4.247128 | -0.471602 | -3.730334 |
| 86.C  | -4.437055 | -2.936040 | -3.269213 |
| 87.C  | -2.455963 | -2.081664 | -4.514840 |
| 88.C  | 2.166151  | -0.180875 | -2.228758 |
| 89.C  | 3.357620  | -1.110691 | -2.633757 |
| 90.C  | 3.890387  | -1.058588 | -4.122253 |
| 91.C  | 4.432961  | 0.358265  | -4.418384 |
| 92.C  | 5.096797  | -2.022452 | -4.230884 |
| 93.C  | 2.827033  | -1.443978 | -5.193272 |
| 94.C  | 2.055509  | 3.317121  | -1.059068 |
| 95.C  | 3.208611  | 4.336152  | -0.763653 |
| 96.C  | 3.837731  | 5.151632  | -1.958995 |
| 97.C  | 2.744093  | 6.061267  | -2.567442 |
| 98.C  | 4.944143  | 6.068972  | -1.390099 |
| 99.C  | 4.446332  | 4.274847  | -3.071696 |
| 100.H | 1.485406  | 2.633025  | 2.340029  |
| 101.H | -0.338940 | 2.765064  | 2.540892  |
| 102.H | 1.765680  | 1.718995  | 4.527875  |
| 103.H | -1.889618 | -1.108696 | 3.933190  |
| 104.H | -0.178697 | -0.828989 | 4.252951  |
| 105.H | -0.664268 | -2.125615 | 3.159629  |
| 106.H | -1.552520 | 0.705867  | 2.464663  |
| 107.H | -1.350506 | -0.638271 | 1.424067  |
| 108.H | 3.426713  | -2.419823 | 1.423681  |
| 109.H | 3.373077  | -1.827100 | 3.089006  |
| 110.H | 1.802426  | -3.664687 | 3.733454  |
| 111.H | 3.238577  | -4.363786 | 2.958360  |
| 112.H | 1.723993  | -4.218817 | 2.048178  |
| 113.H | 4.897016  | -5.670178 | -0.052396 |
| 114.H | 3.387660  | -7.657384 | 0.174781  |
| 115.H | 1.087339  | -7.598028 | -0.714589 |
| 116.H | 0.227615  | -5.555250 | -1.890250 |
| 117.H | 4.181199  | -0.765839 | -2.000170 |
| 118.H | 5.876260  | -1.785688 | -3.499715 |
| 119.H | 5.535214  | -1.930920 | -5.230544 |
| 120.H | 4.811627  | -3.070483 | -4.098437 |
| 121.H | 3.244541  | -2.165553 | -5.905265 |
| 122.H | 1.929884  | -1.886060 | -4.761572 |
| 123.H | 2.508364  | -0.566413 | -5.763490 |
| 124.H | 4.872672  | 0.364655  | -5.422713 |
| 125.H | 3.643636  | 1.109317  | -4.392634 |
| 126.H | 5.213724  | 0.653922  | -3.710911 |
| 127.H | -1.748881 | -1.270759 | -4.694459 |
| 128.H | -3.016331 | -2.258216 | -5.439800 |
| 129.H | -1.882029 | -2.989087 | -4.295642 |
| 130.H | -3.922128 | -3.882796 | -3.075630 |

|       |           |           |           |
|-------|-----------|-----------|-----------|
| 131.H | -4.982661 | -3.037756 | -4.214072 |
| 132.H | -5.178794 | -2.783709 | -2.479424 |
| 133.H | -3.702378 | 0.435946  | -3.474665 |
| 134.H | -5.214101 | -0.441452 | -3.218344 |
| 135.H | -4.442688 | -0.449118 | -4.809176 |
| 136.H | -2.012252 | -2.554651 | -1.993221 |
| 137.H | -3.964494 | -4.224018 | 2.593986  |
| 138.H | -5.055282 | -3.025214 | 4.502436  |
| 139.H | -5.722684 | -0.660609 | 4.287809  |
| 140.H | -5.353642 | 0.577058  | 2.137829  |
| 141.H | -3.846979 | 3.002379  | -2.849126 |
| 142.H | -5.245704 | 4.069352  | -3.018387 |
| 143.H | -5.210774 | 2.858362  | -1.730292 |
| 144.H | -2.642161 | 6.380524  | -1.624836 |
| 145.H | -3.931351 | 6.234807  | -2.823630 |
| 146.H | -2.505042 | 5.186150  | -2.917381 |
| 147.H | -5.668498 | 4.654981  | 0.017986  |
| 148.H | -5.817350 | 5.744944  | -1.366166 |
| 149.H | -4.767530 | 6.181279  | -0.018940 |
| 150.H | -3.705990 | 3.158516  | 0.181619  |
| 151.H | -3.674561 | 5.793071  | 4.791043  |
| 152.H | -2.044393 | 7.380808  | 5.837152  |
| 153.H | -0.044881 | 8.126674  | 4.600016  |
| 154.H | 0.360054  | 7.356330  | 2.247569  |
| 155.H | 5.298394  | 3.691991  | -2.713926 |
| 156.H | 3.713069  | 3.581962  | -3.485876 |
| 157.H | 4.800431  | 4.919804  | -3.885309 |
| 158.H | 3.199999  | 6.717798  | -3.317538 |
| 159.H | 1.956077  | 5.485771  | -3.054946 |
| 160.H | 2.278482  | 6.700406  | -1.807707 |
| 161.H | 5.762337  | 5.499233  | -0.940065 |
| 162.H | 4.555193  | 6.759205  | -0.634231 |
| 163.H | 5.370831  | 6.667065  | -2.203067 |
| 164.H | 2.735308  | 5.083358  | -0.114623 |
| 165.H | 5.477579  | 3.749614  | 4.158979  |
| 166.H | 6.607922  | 1.621236  | 4.842133  |
| 167.H | 6.903742  | -0.221127 | 3.229044  |
| 168.H | 6.107745  | 0.017440  | 0.863772  |

<Feb25-2009> <07:42:00> >>>> CORORT



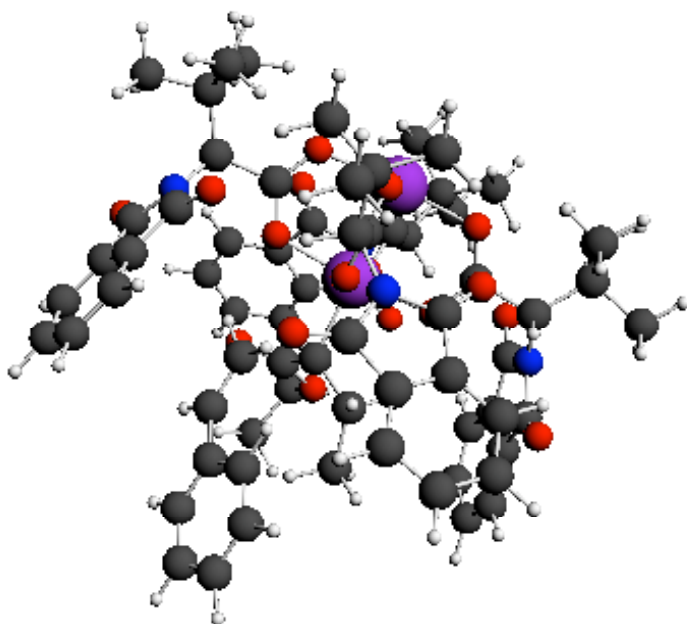

TS-2

E(B3LYP/gen(LanI2dz,6-31G(d))) = **-4504.3090686 a.u.**  
 <Feb25-2009> <10:41:59> Bond Energy LDA -39.20292327 a.u.  
 <Feb25-2009> <10:41:59> Bond Energy LDA -1066.76581967 eV  
 <Feb25-2009> <10:41:59> + GGA-X -33.78444399 a.u.  
 <Feb25-2009> <10:41:59> + GGA-X -919.32149644 eV  
 <Feb25-2009> <10:41:59> + **GGA-XC -37.68854249 a.u.**  
 <Feb25-2009> <10:41:59> + GGA-XC -1025.55742195 eV  
 <Feb25-2009> <10:42:00> NORMAL TERMINATION  
 <Feb25-2009> <10:42:20> END

<Feb25-2009> <05:21:53> Geometry Converged  
 Coordinates in Geometry Cycle 6

| Atom  | X         | Y         | Z (Angstrom) |
|-------|-----------|-----------|--------------|
| 1.C   | -0.477306 | 1.011147  | 4.907103     |
| 2.C   | -1.027026 | 0.557560  | 6.129025     |
| 3.C   | -0.245264 | 0.439013  | 7.273802     |
| 4.C   | 1.109828  | 0.780636  | 7.231966     |
| 5.C   | 1.659619  | 1.284008  | 6.047982     |
| 6.C   | 0.877782  | 1.412374  | 4.905498     |
| 7.C   | -1.307123 | 0.983463  | 3.712766     |
| 8.C   | -0.961847 | 1.273201  | 2.414320     |
| 9.C   | -0.623959 | -0.646217 | 1.302818     |
| 10.C  | -2.002875 | -1.229969 | 1.473579     |
| 11.O  | -3.042060 | -0.595164 | 1.533956     |
| 12.O  | -1.953060 | -2.589079 | 1.474977     |
| 13.C  | -3.237953 | -3.271625 | 1.451855     |
| 14.C  | 0.554725  | -1.217422 | 2.040483     |
| 15.C  | 0.370938  | -2.026640 | 3.331641     |
| 16.Rh | -0.255277 | 0.023568  | -0.658118    |
| 17.Rh | 0.240226  | 0.709880  | -2.987274    |
| 18.N  | -3.386171 | -3.142743 | -2.772862    |

|      |           |           |           |
|------|-----------|-----------|-----------|
| 19.O | -4.270455 | -1.008645 | -3.193066 |
| 20.O | -3.131328 | -5.282496 | -1.846819 |
| 21.C | -4.366318 | -2.122236 | -2.715669 |
| 22.C | -5.508422 | -2.693737 | -1.946976 |
| 23.C | -6.704069 | -2.104109 | -1.563945 |
| 24.C | -7.589026 | -2.877964 | -0.805847 |
| 25.C | -7.275275 | -4.197060 | -0.455727 |
| 26.C | -6.060505 | -4.777100 | -0.838071 |
| 27.C | -5.185995 | -3.996492 | -1.581552 |
| 28.C | -3.800437 | -4.282312 | -2.055796 |
| 29.N | 3.022054  | -3.336829 | -1.063617 |
| 30.O | 1.200965  | -4.094218 | -2.333792 |
| 31.O | 4.480924  | -3.047065 | 0.743305  |
| 32.C | 1.861876  | -4.111175 | -1.313587 |
| 33.C | 1.620793  | -4.918035 | -0.089801 |
| 34.C | 0.559509  | -5.759777 | 0.213742  |
| 35.C | 0.546964  | -6.329482 | 1.490988  |
| 36.C | 1.570287  | -6.067700 | 2.411509  |
| 37.C | 2.631326  | -5.212105 | 2.089591  |
| 38.C | 2.630877  | -4.633484 | 0.825738  |
| 39.C | 3.522669  | -3.597656 | 0.226513  |
| 40.N | 3.398395  | 2.987228  | 0.537956  |
| 41.O | 4.363085  | 1.312453  | -0.791103 |
| 42.O | 2.788858  | 4.199391  | 2.448337  |
| 43.C | 4.278812  | 1.915163  | 0.260679  |
| 44.C | 5.062267  | 1.688490  | 1.506640  |
| 45.C | 6.073808  | 0.773589  | 1.766296  |
| 46.C | 6.666888  | 0.817636  | 3.033190  |
| 47.C | 6.249157  | 1.746721  | 3.995462  |
| 48.C | 5.208012  | 2.645618  | 3.729306  |
| 49.C | 4.622517  | 2.593966  | 2.469731  |
| 50.C | 3.501872  | 3.385088  | 1.883701  |
| 51.N | -3.366456 | 3.544044  | -0.313328 |
| 52.O | -1.238081 | 4.512072  | -0.123711 |
| 53.O | -5.461519 | 2.681180  | 0.287505  |
| 54.C | -2.303654 | 4.178639  | 0.360738  |
| 55.C | -2.729624 | 4.318277  | 1.779174  |
| 56.C | -2.018067 | 4.797665  | 2.870814  |
| 57.C | -2.623597 | 4.696279  | 4.127271  |
| 58.C | -3.901885 | 4.140300  | 4.266662  |
| 59.C | -4.612146 | 3.663583  | 3.158032  |
| 60.C | -3.996841 | 3.758818  | 1.916186  |
| 61.C | -4.425065 | 3.250133  | 0.580552  |
| 62.O | -1.351767 | -1.579684 | -1.572703 |
| 63.O | -0.880973 | -0.893363 | -3.686912 |
| 64.O | 1.488262  | -1.161079 | -0.824945 |
| 65.O | 1.917744  | -0.554822 | -2.967907 |
| 66.O | 1.005612  | 1.620670  | -0.059811 |
| 67.O | 1.380588  | 2.265164  | -2.201554 |
| 68.O | -1.890633 | 1.328921  | -0.734668 |
| 69.O | -1.454643 | 1.949569  | -2.872132 |
| 70.C | -1.379911 | -1.692720 | -2.843677 |
| 71.C | -2.043891 | -3.015361 | -3.369663 |
| 72.C | -1.994108 | -3.348567 | -4.910935 |
| 73.C | -2.563329 | -4.774906 | -5.121376 |
| 74.C | -2.796551 | -2.366150 | -5.788715 |

|       |           |           |           |
|-------|-----------|-----------|-----------|
| 75.C  | -0.522315 | -3.389824 | -5.394176 |
| 76.C  | 2.154268  | -1.204667 | -1.911925 |
| 77.C  | 3.410892  | -2.131883 | -1.828613 |
| 78.C  | 4.289907  | -2.382774 | -3.120314 |
| 79.C  | 3.513020  | -2.941232 | -4.328387 |
| 80.C  | 5.411772  | -3.376738 | -2.744453 |
| 81.C  | 4.961456  | -1.051520 | -3.521573 |
| 82.C  | 1.530408  | 2.366042  | -0.954189 |
| 83.C  | 2.386571  | 3.537132  | -0.385556 |
| 84.C  | 2.936339  | 4.627379  | -1.400810 |
| 85.C  | 1.736017  | 5.301209  | -2.093540 |
| 86.C  | 3.670458  | 5.717575  | -0.590263 |
| 87.C  | 3.900156  | 4.065571  | -2.464368 |
| 88.C  | -2.097548 | 2.019162  | -1.786681 |
| 89.C  | -3.321886 | 2.989370  | -1.680024 |
| 90.C  | -3.558449 | 4.029385  | -2.843259 |
| 91.C  | -3.864964 | 3.247813  | -4.143543 |
| 92.C  | -4.817242 | 4.859556  | -2.504649 |
| 93.C  | -2.365476 | 4.995362  | -3.079778 |
| 94.C  | -3.805546 | -3.512158 | 2.842324  |
| 95.H  | 4.224076  | -3.197088 | -5.124522 |
| 96.H  | 2.951468  | -3.842716 | -4.077653 |
| 97.H  | 2.811190  | -2.206931 | -4.729662 |
| 98.H  | 6.004593  | -3.020898 | -1.895331 |
| 99.H  | 6.089627  | -3.494808 | -3.597562 |
| 100.H | 5.021073  | -4.367640 | -2.495363 |
| 101.H | 5.610751  | -1.221693 | -4.389029 |
| 102.H | 4.231198  | -0.287579 | -3.793687 |
| 103.H | 5.584881  | -0.650321 | -2.715119 |
| 104.H | 4.070480  | -1.601868 | -1.132126 |
| 105.H | -0.238620 | -5.936878 | -0.501616 |
| 106.H | -0.280337 | -6.974799 | 1.781296  |
| 107.H | 1.526305  | -6.519743 | 3.398913  |
| 108.H | 3.413964  | -4.984378 | 2.808955  |
| 109.H | -1.984720 | -5.528041 | -4.576643 |
| 110.H | -2.518205 | -5.023725 | -6.187130 |
| 111.H | -3.609298 | -4.861913 | -4.813186 |
| 112.H | -0.048051 | -2.409458 | -5.359377 |
| 113.H | -0.503880 | -3.741793 | -6.431526 |
| 114.H | 0.076776  | -4.082727 | -4.797996 |
| 115.H | -2.500546 | -1.329640 | -5.616556 |
| 116.H | -3.873769 | -2.447381 | -5.611735 |
| 117.H | -2.620568 | -2.602964 | -6.844742 |
| 118.H | -1.463448 | -3.798651 | -2.871358 |
| 119.H | -5.802328 | -5.794418 | -0.554888 |
| 120.H | -7.984523 | -4.773973 | 0.134100  |
| 121.H | -8.531733 | -2.447297 | -0.476331 |
| 122.H | -6.928617 | -1.074832 | -1.831297 |
| 123.H | -2.991185 | 2.714509  | -4.518642 |
| 124.H | -4.190546 | 3.955983  | -4.914375 |
| 125.H | -4.672605 | 2.520003  | -4.000082 |
| 126.H | -4.698891 | 5.428838  | -1.577912 |
| 127.H | -5.709279 | 4.231776  | -2.407609 |
| 128.H | -4.999384 | 5.581167  | -3.309247 |
| 129.H | -1.414949 | 4.571504  | -2.758605 |
| 130.H | -2.503277 | 5.942385  | -2.544262 |

|       |           |           |           |
|-------|-----------|-----------|-----------|
| 131.H | -2.278091 | 5.231285  | -4.148049 |
| 132.H | -4.187761 | 2.315803  | -1.698215 |
| 133.H | -5.594615 | 3.211721  | 3.263039  |
| 134.H | -4.338766 | 4.059238  | 5.259872  |
| 135.H | -2.084983 | 5.028225  | 5.011627  |
| 136.H | -1.013068 | 5.196021  | 2.751425  |
| 137.H | -2.076558 | 0.268524  | 6.162530  |
| 138.H | -0.684646 | 0.063629  | 8.196087  |
| 139.H | 1.733257  | 0.656621  | 8.115765  |
| 140.H | 2.709887  | 1.565757  | 6.013388  |
| 141.H | 1.323750  | 1.814421  | 4.001354  |
| 142.H | -0.005230 | 1.713843  | 2.164774  |
| 143.H | -1.765627 | 1.420787  | 1.707528  |
| 144.H | -2.336466 | 0.667364  | 3.880957  |
| 145.H | 1.331467  | -2.097755 | 3.853838  |
| 146.H | 0.021032  | -3.037134 | 3.118480  |
| 147.H | -0.340557 | -1.560786 | 4.015929  |
| 148.H | 1.058812  | -1.848893 | 1.295910  |
| 149.H | 1.276974  | -0.408146 | 2.193333  |
| 150.H | 2.100363  | 6.112071  | -2.735872 |
| 151.H | 1.177933  | 4.607149  | -2.721503 |
| 152.H | 1.041864  | 5.740267  | -1.369855 |
| 153.H | 3.034432  | 6.145578  | 0.191306  |
| 154.H | 3.958984  | 6.532331  | -1.264700 |
| 155.H | 4.586295  | 5.344956  | -0.121800 |
| 156.H | 4.825350  | 3.686102  | -2.022368 |
| 157.H | 3.444489  | 3.260767  | -3.042901 |
| 158.H | 4.173710  | 4.870869  | -3.158369 |
| 159.H | 1.698555  | 4.069823  | 0.278736  |
| 160.H | 4.873551  | 3.365188  | 4.472466  |
| 161.H | 6.741580  | 1.765721  | 4.964608  |
| 162.H | 7.466613  | 0.121085  | 3.274947  |
| 163.H | 6.383380  | 0.053011  | 1.014551  |
| 164.H | -3.021656 | -4.215575 | 0.946902  |
| 165.H | -3.932391 | -2.683621 | 0.852367  |
| 166.H | -3.118621 | -4.094963 | 3.464327  |
| 167.H | -4.741921 | -4.075618 | 2.746814  |
| 168.H | -4.031209 | -2.568372 | 3.345425  |

<Feb25-2009> <05:21:56> >>>> CORORT

**Table** Energies (a.u.) of the reactants and transition states. Relative energies ( $E_{\text{rel}}$ , kcal/mol) are with respect to isolated reactants and styrene.

|                    | OLYP/TZP(Small), E (a.u) | single-point energy refinement:<br>B3LYP/gen (lanl2dz, 6-31G*) //OLYP/TZP(Small),<br>E(a.u) | $E_{\text{rel}}$<br>(kcal/mol) |
|--------------------|--------------------------|---------------------------------------------------------------------------------------------|--------------------------------|
| Styrene            | -3.56107742              | -309.6480403                                                                                |                                |
| R-1 (Rh-reactant)  | -34.1685580              | -4194.678305                                                                                |                                |
| TS-1               | -37.6863646              | -4504.309478                                                                                | 10.6                           |
| TS-2               | -37.6885425              | -4504.309069                                                                                | 10.8                           |
| R-1s (Rh-reactant) | -7.75820338              | -1360.868602                                                                                |                                |
| TS-1s              | -11.2934487              | -1670.506744                                                                                | 6.2                            |

Reactants:

### Styrene

<Feb12-2009> <13:27:10> Geometry Converged

Coordinates in Geometry Cycle 7

| Atom | X         | Y        | Z (Angstrom) |
|------|-----------|----------|--------------|
| 1.C  | -0.160479 | 2.103625 | 5.306685     |
| 2.C  | 0.159444  | 1.402785 | 6.482746     |
| 3.C  | -0.788745 | 1.190719 | 7.482576     |
| 4.C  | -2.084928 | 1.684357 | 7.333921     |
| 5.C  | -2.417816 | 2.396849 | 6.173436     |
| 6.C  | -1.470413 | 2.602996 | 5.176108     |
| 7.C  | 0.882295  | 2.282569 | 4.275970     |
| 8.C  | 0.749683  | 2.748044 | 3.033748     |
| 9.H  | 1.168197  | 1.012395 | 6.610893     |
| 10.H | -0.514444 | 0.639246 | 8.380129     |
| 11.H | -2.828420 | 1.525096 | 8.110303     |
| 12.H | -3.422256 | 2.796809 | 6.054876     |
| 13.H | -1.751590 | 3.172763 | 4.293955     |
| 14.H | 1.614005  | 2.821723 | 2.374436     |
| 15.H | -0.203837 | 3.064043 | 2.611677     |
| 16.H | 1.880371  | 1.971388 | 4.595320     |

<Feb12-2009> <13:30:51> Bond Energy LDA -3.65721205 a.u.

<Feb12-2009> <13:30:51> Bond Energy LDA -99.51780328 eV

<Feb12-2009> <13:30:51> + GGA-X -3.22011320 a.u.

<Feb12-2009> <13:30:51> + GGA-X -87.62373850 eV

<Feb12-2009> <13:30:51> + GGA-XC -3.56107742 a.u.

<Feb12-2009> <13:30:51> + GGA-XC -96.90184698 eV

<Feb12-2009> <13:30:51> NORMAL TERMINATION

<Feb12-2009> <13:30:51> END

### R-1s

<Feb25-2009> <17:00:31> Geometry Converged

Coordinates in Geometry Cycle 16

| Atom  | X         | Y         | Z (Angstrom) |
|-------|-----------|-----------|--------------|
| 1.C   | 0.334036  | 0.149391  | 1.534928     |
| 2.C   | 1.578602  | -0.477122 | 2.034846     |
| 3.O   | 2.360941  | 0.222559  | 2.659242     |
| 4.O   | 1.700460  | -1.783467 | 1.757540     |
| 5.C   | 2.894442  | -2.489765 | 2.221913     |
| 6.C   | -0.859067 | 0.135472  | 2.424362     |
| 7.C   | -0.834226 | -0.684136 | 3.720737     |
| 8.C   | 2.479963  | -3.863618 | 2.711183     |
| 9.Rh  | 0.275961  | 0.975581  | -0.275830    |
| 10.Rh | 0.103504  | 1.861275  | -2.590801    |
| 11.O  | -1.395615 | 2.160612  | 0.193522     |
| 12.O  | -1.559481 | 2.967476  | -1.944756    |
| 13.O  | -1.008981 | -0.560256 | -0.932574    |
| 14.O  | -1.127681 | 0.243913  | -3.071511    |
| 15.O  | 1.946478  | -0.111812 | -0.941231    |
| 16.O  | 1.794521  | 0.728027  | -3.068771    |
| 17.O  | 1.532561  | 2.602936  | 0.116989     |
| 18.O  | 1.353490  | 3.428695  | -2.011441    |

19.C -1.905115 2.867017 -0.737421  
 20.C -1.395630 -0.567027 -2.145036  
 21.C 2.310169 0.031573 -2.152164  
 22.C 1.771596 3.428570 -0.821054  
 23.H -1.801825 -0.600132 4.228230  
 24.H -0.062984 -0.327806 4.411376  
 25.H -0.653825 -1.745080 3.520611  
 26.H -1.107308 1.189637 2.632981  
 27.H -1.697746 -0.180609 1.782570  
 28.H 3.565462 -2.554643 1.358656  
 29.H 3.381236 -1.901635 3.002342  
 30.H 1.876602 -3.798364 3.622607  
 31.H 3.375154 -4.454263 2.936862  
 32.H 1.903185 -4.397869 1.949339  
 33.H 2.442355 4.258825 -0.539116  
 34.H -2.774371 3.472796 -0.425211  
 35.H -2.059158 -1.409815 -2.406355  
 36.H 3.210623 -0.544718 -2.429411  
 <Feb25-2009> <17:00:32> >>>> CORORT

<Feb25-2009> <17:08:22> Bond Energy LDA -8.13678946 a.u.  
 <Feb25-2009> <17:08:22> Bond Energy LDA -221.41330689 eV  
 <Feb25-2009> <17:08:22> + GGA-X -6.95024038 a.u.  
 <Feb25-2009> <17:08:22> + GGA-X -189.12566351 eV  
 <Feb25-2009> <17:08:22> + GGA-XC -7.75820338 a.u.  
 <Feb25-2009> <17:08:22> + GGA-XC -211.11145551 eV  
 <Feb25-2009> <17:08:22> NORMAL TERMINATION  
 <Feb25-2009> <17:08:24> END

### R-1

<Feb19-2009> <17:00:28> Geometry Converged  
 Coordinates in Geometry Cycle 22

| Atom  | X         | Y         | Z (Angstrom) |
|-------|-----------|-----------|--------------|
| 1.C   | 0.377438  | 0.246927  | 1.521199     |
| 2.C   | 1.612980  | -0.309415 | 2.110985     |
| 3.O   | 2.283040  | 0.454878  | 2.787544     |
| 4.O   | 1.851961  | -1.605196 | 1.880869     |
| 5.C   | 3.013792  | -2.222991 | 2.521267     |
| 6.C   | -0.829880 | 0.269309  | 2.391039     |
| 7.C   | -0.818958 | -0.472165 | 3.732902     |
| 8.C   | 2.616314  | -3.612102 | 2.981389     |
| 9.Rh  | 0.293681  | 0.986156  | -0.323207    |
| 10.Rh | 0.047164  | 1.774172  | -2.644534    |
| 11.N  | -2.515596 | 4.791600  | 0.903205     |
| 12.O  | -0.614480 | 5.868588  | 0.051174     |
| 13.O  | -4.088313 | 3.994604  | 2.443618     |
| 14.C  | -1.407295 | 5.668319  | 0.949868     |
| 15.C  | -1.420108 | 6.277682  | 2.310062     |
| 16.C  | -0.583068 | 7.235359  | 2.865374     |
| 17.C  | -0.854748 | 7.644676  | 4.175565     |
| 18.C  | -1.924621 | 7.098306  | 4.896320     |
| 19.C  | -2.751168 | 6.119725  | 4.331965     |
| 20.C  | -2.476161 | 5.725575  | 3.029013     |
| 21.C  | -3.159615 | 4.730716  | 2.156222     |
| 22.N  | -3.513933 | -1.747767 | -0.850395    |
| 23.O  | -4.381889 | 0.418735  | -0.645342    |

|      |           |           |           |
|------|-----------|-----------|-----------|
| 24.O | -2.854802 | -3.920841 | -0.274753 |
| 25.C | -4.186396 | -0.693580 | -0.196447 |
| 26.C | -4.575528 | -1.207541 | 1.146153  |
| 27.C | -5.213782 | -0.559866 | 2.195559  |
| 28.C | -5.394350 | -1.283238 | 3.379536  |
| 29.C | -4.947856 | -2.606015 | 3.493390  |
| 30.C | -4.301835 | -3.246056 | 2.429473  |
| 31.C | -4.123683 | -2.518652 | 1.259814  |
| 32.C | -3.419501 | -2.876457 | -0.004915 |
| 33.N | 3.064626  | -2.564104 | -2.214491 |
| 34.O | 0.889944  | -3.018375 | -2.968590 |
| 35.O | 5.048181  | -2.760660 | -0.981806 |
| 36.C | 1.897042  | -3.343649 | -2.371314 |
| 37.C | 2.156022  | -4.628952 | -1.663234 |
| 38.C | 1.347248  | -5.747758 | -1.522787 |
| 39.C | 1.873021  | -6.834776 | -0.815995 |
| 40.C | 3.164019  | -6.788661 | -0.274168 |
| 41.C | 3.962279  | -5.646674 | -0.405340 |
| 42.C | 3.428260  | -4.572285 | -1.104190 |
| 43.C | 3.996992  | -3.224853 | -1.389124 |
| 44.N | 4.157706  | 3.638449  | 0.187962  |
| 45.O | 4.813058  | 1.746017  | -1.026166 |
| 46.O | 3.857342  | 5.114351  | 1.978268  |
| 47.C | 4.813165  | 2.403877  | -0.003725 |
| 48.C | 5.482501  | 2.077404  | 1.284777  |
| 49.C | 6.222335  | 0.959164  | 1.643142  |
| 50.C | 6.686905  | 0.894038  | 2.961065  |
| 51.C | 6.412895  | 1.919419  | 3.875133  |
| 52.C | 5.663805  | 3.040867  | 3.501349  |
| 53.C | 5.204751  | 3.094196  | 2.192317  |
| 54.C | 4.336548  | 4.096353  | 1.512684  |
| 55.O | -1.216727 | 2.382270  | 0.180249  |
| 56.O | -1.429753 | 3.097578  | -1.958836 |
| 57.O | -1.179757 | -0.423887 | -0.778832 |
| 58.O | -1.434060 | 0.289251  | -2.913530 |
| 59.O | 1.788491  | -0.321478 | -1.079130 |
| 60.O | 1.528765  | 0.423813  | -3.205228 |
| 61.O | 1.760200  | 2.461191  | -0.082054 |
| 62.O | 1.564774  | 3.171827  | -2.225082 |
| 63.C | -1.745372 | 3.095477  | -0.738369 |
| 64.C | -2.945098 | 3.965897  | -0.242596 |
| 65.C | -3.840175 | 4.723348  | -1.303818 |
| 66.C | -5.004571 | 5.409050  | -0.551215 |
| 67.C | -3.092661 | 5.792198  | -2.125584 |
| 68.C | -4.468606 | 3.682934  | -2.259948 |
| 69.C | -1.710409 | -0.459932 | -1.937860 |
| 70.C | -2.725586 | -1.636664 | -2.098263 |
| 71.C | -3.530743 | -1.779806 | -3.442981 |
| 72.C | -4.382329 | -0.548902 | -3.811815 |
| 73.C | -4.457914 | -3.009717 | -3.321333 |
| 74.C | -2.521639 | -2.071059 | -4.579452 |
| 75.C | 2.076537  | -0.290593 | -2.320291 |
| 76.C | 3.287437  | -1.193105 | -2.718664 |
| 77.C | 3.842379  | -1.110584 | -4.198169 |
| 78.C | 4.420767  | 0.306381  | -4.421657 |
| 79.C | 5.017445  | -2.106381 | -4.337740 |

|       |           |           |           |
|-------|-----------|-----------|-----------|
| 80.C  | 2.805619  | -1.424992 | -5.295302 |
| 81.C  | 2.083341  | 3.194513  | -1.073059 |
| 82.C  | 3.176461  | 4.256858  | -0.724984 |
| 83.C  | 3.778861  | 5.150748  | -1.876994 |
| 84.C  | 2.652770  | 6.054178  | -2.433481 |
| 85.C  | 4.852637  | 6.078748  | -1.263703 |
| 86.C  | 4.421702  | 4.354941  | -3.029942 |
| 87.H  | -1.792299 | -0.358463 | 4.220913  |
| 88.H  | -0.054396 | -0.075896 | 4.407524  |
| 89.H  | -0.638997 | -1.543150 | 3.596742  |
| 90.H  | -1.092777 | 1.330762  | 2.530896  |
| 91.H  | -1.651463 | -0.093417 | 1.756693  |
| 92.H  | 3.803879  | -2.257332 | 1.765642  |
| 93.H  | 3.345892  | -1.590419 | 3.346220  |
| 94.H  | 1.872242  | -3.568506 | 3.783288  |
| 95.H  | 3.500549  | -4.135463 | 3.363831  |
| 96.H  | 2.204800  | -4.199464 | 2.155889  |
| 97.H  | 4.961658  | -5.598170 | 0.019390  |
| 98.H  | 3.547536  | -7.654310 | 0.261148  |
| 99.H  | 1.270999  | -7.731062 | -0.685298 |
| 100.H | 0.345449  | -5.769126 | -1.943761 |
| 101.H | 4.095473  | -0.821649 | -2.080598 |
| 102.H | 5.786371  | -1.945966 | -3.576394 |
| 103.H | 5.487192  | -1.968779 | -5.317819 |
| 104.H | 4.689113  | -3.148972 | -4.280354 |
| 105.H | 3.317097  | -1.484857 | -6.264082 |
| 106.H | 2.302139  | -2.380346 | -5.128930 |
| 107.H | 2.039677  | -0.651000 | -5.367613 |
| 108.H | 4.853778  | 0.364161  | -5.427002 |
| 109.H | 3.659908  | 1.082763  | -4.340806 |
| 110.H | 5.216013  | 0.534864  | -3.703997 |
| 111.H | -1.868984 | -1.220850 | -4.780463 |
| 112.H | -3.070928 | -2.302016 | -5.499197 |
| 113.H | -1.887954 | -2.933990 | -4.345600 |
| 114.H | -3.898783 | -3.920222 | -3.082647 |
| 115.H | -4.970206 | -3.172146 | -4.275792 |
| 116.H | -5.227830 | -2.873435 | -2.555953 |
| 117.H | -3.773519 | 0.351076  | -3.916931 |
| 118.H | -5.157726 | -0.347949 | -3.068319 |
| 119.H | -4.880936 | -0.732826 | -4.771418 |
| 120.H | -2.078815 | -2.520743 | -2.051647 |
| 121.H | -3.937766 | -4.266391 | 2.515420  |
| 122.H | -5.097007 | -3.138527 | 4.430198  |
| 123.H | -5.880767 | -0.809661 | 4.229262  |
| 124.H | -5.538403 | 0.473641  | 2.101333  |
| 125.H | -3.722506 | 3.181181  | -2.876698 |
| 126.H | -5.169394 | 4.193428  | -2.930503 |
| 127.H | -5.029561 | 2.917360  | -1.714730 |
| 128.H | -2.697278 | 6.594037  | -1.496735 |
| 129.H | -3.792752 | 6.247935  | -2.836788 |
| 130.H | -2.262805 | 5.366910  | -2.692484 |
| 131.H | -5.581397 | 4.697487  | 0.048325  |
| 132.H | -5.687691 | 5.860368  | -1.279279 |
| 133.H | -4.661450 | 6.211650  | 0.108681  |
| 134.H | -3.605899 | 3.226641  | 0.222093  |
| 135.H | -3.579647 | 5.685277  | 4.885082  |



|       |           |          |           |
|-------|-----------|----------|-----------|
| 136.H | -2.112689 | 7.440347 | 5.911646  |
| 137.H | -0.224524 | 8.397243 | 4.643997  |
| 138.H | 0.249617  | 7.644689 | 2.299743  |
| 139.H | 5.253957  | 3.736434 | -2.685286 |
| 140.H | 3.700682  | 3.705413 | -3.529032 |
| 141.H | 4.814458  | 5.057567 | -3.775426 |
| 142.H | 3.080084  | 6.763821 | -3.151328 |
| 143.H | 1.877774  | 5.482973 | -2.945457 |
| 144.H | 2.173333  | 6.637013 | -1.638116 |
| 145.H | 5.714054  | 5.521721 | -0.883298 |
| 146.H | 4.452362  | 6.686543 | -0.446275 |
| 147.H | 5.221039  | 6.760953 | -2.037924 |
| 148.H | 2.639943  | 4.953333 | -0.068608 |
| 149.H | 5.433064  | 3.833141 | 4.208351  |
| 150.H | 6.781078  | 1.835254 | 4.895369  |
| 151.H | 7.263915  | 0.030732 | 3.285864  |
| 152.H | 6.413094  | 0.162562 | 0.927736  |

<Feb19-2009> <17:00:32> >>>> CORORT  
<Feb19-2009> <19:50:59> Bond Energy LDA -35.54579684 a.u.  
<Feb19-2009> <19:50:59> Bond Energy LDA -967.25034603 eV  
<Feb19-2009> <19:50:59> + GGA-X -30.62944806 a.u.  
<Feb19-2009> <19:50:59> + GGA-X -833.46968894 eV  
<Feb19-2009> <19:50:59> + GGA-XC -34.16855803 a.u.  
<Feb19-2009> <19:50:59> + GGA-XC -929.77377124 eV  
<Feb19-2009> <19:50:59> NORMAL TERMINATION  
<Feb19-2009> <19:51:05> END

**PRELIMINARY OLYP/DZ(Large) optimizations of TS-1, TS-2 and TS-3**

**TS-1** Bond Energy LDA + GGA-XC -35.86168368 a.u.

| Atom  | X         | Y         | Z (Angstrom) |
|-------|-----------|-----------|--------------|
| 1.C   | -0.251554 | 1.802520  | 5.232741     |
| 2.C   | 0.072915  | 1.018336  | 6.368893     |
| 3.C   | -0.925232 | 0.536438  | 7.215647     |
| 4.C   | -2.267995 | 0.866760  | 6.978286     |
| 5.C   | -2.591022 | 1.741624  | 5.931227     |
| 6.C   | -1.596079 | 2.212231  | 5.072250     |
| 7.C   | 0.788811  | 2.054921  | 4.242805     |
| 8.C   | 0.627102  | 2.416658  | 2.919077     |
| 9.H   | 1.110859  | 0.752523  | 6.553520     |
| 10.H  | -0.663297 | -0.111492 | 8.048483     |
| 11.H  | -3.051287 | 0.455777  | 7.610757     |
| 12.H  | -3.621419 | 2.050652  | 5.776891     |
| 13.H  | -1.856599 | 2.914563  | 4.293013     |
| 14.C  | 0.435307  | 0.465400  | 1.813395     |
| 15.C  | 1.730241  | -0.181260 | 2.193551     |
| 16.O  | 2.800945  | 0.378326  | 2.497970     |
| 17.O  | 1.583986  | -1.570416 | 2.102878     |
| 18.C  | 2.820098  | -2.404231 | 2.296436     |
| 19.C  | -0.880975 | -0.077716 | 2.295409     |
| 20.C  | -0.927182 | -1.080584 | 3.467344     |
| 21.C  | 2.353918  | -3.773604 | 2.764234     |
| 22.Rh | 0.332904  | 1.103877  | -0.209688    |
| 23.Rh | 0.060800  | 1.792608  | -2.661778    |
| 24.N  | -2.679150 | 4.718218  | 0.846397     |
| 25.O  | -0.655799 | 5.595172  | -0.049767    |

|      |           |           |           |
|------|-----------|-----------|-----------|
| 26.O | -4.324903 | 4.042524  | 2.421999  |
| 27.C | -1.483373 | 5.491378  | 0.872355  |
| 28.C | -1.439210 | 6.111316  | 2.222862  |
| 29.C | -0.492823 | 6.965329  | 2.769958  |
| 30.C | -0.716066 | 7.423544  | 4.080696  |
| 31.C | -1.855105 | 7.028317  | 4.798417  |
| 32.C | -2.797843 | 6.146929  | 4.237109  |
| 33.C | -2.563121 | 5.694459  | 2.945400  |
| 34.C | -3.334706 | 4.736864  | 2.101527  |
| 35.N | -3.393877 | -1.771509 | -0.816356 |
| 36.O | -4.108957 | 0.490062  | -0.657791 |
| 37.O | -2.861966 | -4.011417 | -0.238622 |
| 38.C | -3.990243 | -0.652283 | -0.180801 |
| 39.C | -4.388273 | -1.121865 | 1.171777  |
| 40.C | -4.966653 | -0.409976 | 2.212836  |
| 41.C | -5.183432 | -1.096061 | 3.420427  |
| 42.C | -4.829393 | -2.447000 | 3.555967  |
| 43.C | -4.240827 | -3.154944 | 2.491827  |
| 44.C | -4.025547 | -2.466311 | 1.305483  |
| 45.C | -3.367029 | -2.903501 | 0.038708  |
| 46.N | 3.123929  | -2.462095 | -2.144677 |
| 47.O | 0.862975  | -2.730341 | -2.843020 |
| 48.O | 5.161765  | -2.798444 | -0.970966 |
| 49.C | 1.890364  | -3.154671 | -2.286690 |
| 50.C | 2.093852  | -4.472328 | -1.625267 |
| 51.C | 1.222115  | -5.545823 | -1.512650 |
| 52.C | 1.693425  | -6.695088 | -0.853589 |
| 53.C | 2.994467  | -6.743268 | -0.329551 |
| 54.C | 3.863075  | -5.641654 | -0.440329 |
| 55.C | 3.386908  | -4.512671 | -1.093880 |
| 56.C | 4.046437  | -3.201978 | -1.364012 |
| 57.N | 4.151726  | 3.678112  | 0.151645  |
| 58.O | 4.541982  | 1.702238  | -1.107678 |
| 59.O | 4.009320  | 5.195120  | 1.970950  |
| 60.C | 4.652322  | 2.361185  | -0.060872 |
| 61.C | 5.292982  | 1.961875  | 1.217507  |
| 62.C | 5.878214  | 0.754196  | 1.567785  |
| 63.C | 6.348626  | 0.622865  | 2.884750  |
| 64.C | 6.231539  | 1.678205  | 3.801679  |
| 65.C | 5.627961  | 2.894846  | 3.434778  |
| 66.C | 5.158387  | 3.010258  | 2.133171  |
| 67.C | 4.399486  | 4.113876  | 1.479356  |
| 68.O | -1.293527 | 2.401770  | 0.222788  |
| 69.O | -1.550379 | 3.041904  | -1.992549 |
| 70.O | -1.060999 | -0.466911 | -0.727739 |
| 71.O | -1.332826 | 0.203623  | -2.926801 |
| 72.O | 1.918332  | -0.184813 | -0.972860 |
| 73.O | 1.676156  | 0.534535  | -3.168437 |
| 74.O | 1.710942  | 2.671317  | 0.004020  |
| 75.O | 1.523753  | 3.307066  | -2.213415 |
| 76.C | -1.880978 | 3.055895  | -0.751588 |
| 77.C | -3.117386 | 3.852222  | -0.272632 |
| 78.C | -3.987115 | 4.593744  | -1.344146 |
| 79.C | -5.135970 | 5.305808  | -0.584375 |
| 80.C | -3.191923 | 5.631713  | -2.175644 |
| 81.C | -4.613729 | 3.537548  | -2.286725 |

|       |           |           |           |
|-------|-----------|-----------|-----------|
| 82.C  | -1.597483 | -0.550879 | -1.915119 |
| 83.C  | -2.616122 | -1.713907 | -2.072541 |
| 84.C  | -3.475224 | -1.769316 | -3.384649 |
| 85.C  | -4.249088 | -0.449062 | -3.679261 |
| 86.C  | -4.485572 | -2.935040 | -3.236052 |
| 87.C  | -2.523918 | -2.105664 | -4.563129 |
| 88.C  | 2.227006  | -0.177923 | -2.240800 |
| 89.C  | 3.415877  | -1.092941 | -2.629561 |
| 90.C  | 3.911688  | -1.055863 | -4.121726 |
| 91.C  | 4.427268  | 0.369956  | -4.441325 |
| 92.C  | 5.120830  | -2.022253 | -4.228377 |
| 93.C  | 2.818519  | -1.471424 | -5.156647 |
| 94.C  | 2.057676  | 3.372828  | -1.045743 |
| 95.C  | 3.197259  | 4.377280  | -0.738017 |
| 96.C  | 3.836589  | 5.140658  | -1.944999 |
| 97.C  | 2.746209  | 6.045460  | -2.575260 |
| 98.C  | 4.965500  | 6.039474  | -1.385841 |
| 99.C  | 4.418244  | 4.197473  | -3.018632 |
| 100.H | 1.512927  | 2.696842  | 2.361127  |
| 101.H | -0.319344 | 2.770740  | 2.530494  |
| 102.H | 1.805896  | 1.860055  | 4.580307  |
| 103.H | -1.935986 | -1.080433 | 3.892688  |
| 104.H | -0.219932 | -0.825551 | 4.258853  |
| 105.H | -0.691932 | -2.084528 | 3.105219  |
| 106.H | -1.547547 | 0.772185  | 2.484084  |
| 107.H | -1.319803 | -0.559289 | 1.407865  |
| 108.H | 3.315905  | -2.444174 | 1.328360  |
| 109.H | 3.457772  | -1.898417 | 3.025211  |
| 110.H | 1.827913  | -3.694396 | 3.722158  |
| 111.H | 3.225246  | -4.428513 | 2.893063  |
| 112.H | 1.686667  | -4.223987 | 2.022766  |
| 113.H | 4.872666  | -5.669382 | -0.040921 |
| 114.H | 3.336105  | -7.647460 | 0.166631  |
| 115.H | 1.041321  | -7.558357 | -0.753425 |
| 116.H | 0.215692  | -5.490709 | -1.916494 |
| 117.H | 4.240197  | -0.745052 | -1.999089 |
| 118.H | 5.917636  | -1.744709 | -3.527690 |
| 119.H | 5.526237  | -1.969342 | -5.246927 |
| 120.H | 4.826775  | -3.060458 | -4.034358 |
| 121.H | 3.190307  | -2.280767 | -5.798936 |
| 122.H | 1.896317  | -1.807963 | -4.684160 |
| 123.H | 2.558153  | -0.622053 | -5.797983 |
| 124.H | 4.875147  | 0.363721  | -5.443803 |
| 125.H | 3.610943  | 1.092563  | -4.428149 |
| 126.H | 5.189976  | 0.691522  | -3.723877 |
| 127.H | -1.796922 | -1.306203 | -4.723921 |
| 128.H | -3.121763 | -2.231409 | -5.475141 |
| 129.H | -1.979751 | -3.041223 | -4.380514 |
| 130.H | -3.976680 | -3.891740 | -3.065252 |
| 131.H | -5.072150 | -3.015681 | -4.160524 |
| 132.H | -5.178525 | -2.754398 | -2.405909 |
| 133.H | -3.866333 | 0.389664  | -3.104217 |
| 134.H | -5.315459 | -0.559970 | -3.446974 |
| 135.H | -4.158064 | -0.191613 | -4.741781 |
| 136.H | -1.999408 | -2.620937 | -2.049170 |
| 137.H | -3.950129 | -4.196551 | 2.591406  |

|       |           |           |           |
|-------|-----------|-----------|-----------|
| 138.H | -5.002616 | -2.951030 | 4.502608  |
| 139.H | -5.622931 | -0.569150 | 4.262353  |
| 140.H | -5.218883 | 0.640429  | 2.096556  |
| 141.H | -3.841628 | 2.977774  | -2.816742 |
| 142.H | -5.239718 | 4.052038  | -3.027423 |
| 143.H | -5.240875 | 2.829136  | -1.734333 |
| 144.H | -2.425661 | 6.136859  | -1.583760 |
| 145.H | -3.884236 | 6.392344  | -2.561076 |
| 146.H | -2.692844 | 5.150657  | -3.021916 |
| 147.H | -5.678766 | 4.608553  | 0.065033  |
| 148.H | -5.845918 | 5.715094  | -1.313832 |
| 149.H | -4.758245 | 6.134323  | 0.026818  |
| 150.H | -3.755344 | 3.094938  | 0.196199  |
| 151.H | -3.678840 | 5.831974  | 4.788287  |
| 152.H | -2.007253 | 7.403400  | 5.806527  |
| 153.H | 0.005812  | 8.090541  | 4.543561  |
| 154.H | 0.388255  | 7.254633  | 2.204687  |
| 155.H | 5.283674  | 3.646784  | -2.639915 |
| 156.H | 3.671487  | 3.479138  | -3.356922 |
| 157.H | 4.741317  | 4.795464  | -3.881593 |
| 158.H | 3.211768  | 6.697460  | -3.325280 |
| 159.H | 1.970228  | 5.448872  | -3.060399 |
| 160.H | 2.270479  | 6.682479  | -1.817583 |
| 161.H | 5.716190  | 5.445197  | -0.852504 |
| 162.H | 4.569129  | 6.798743  | -0.700393 |
| 163.H | 5.463355  | 6.549854  | -2.220149 |
| 164.H | 2.735657  | 5.131939  | -0.087849 |
| 165.H | 5.519957  | 3.713489  | 4.140385  |
| 166.H | 6.603878  | 1.549363  | 4.814561  |
| 167.H | 6.797290  | -0.314767 | 3.201652  |
| 168.H | 5.934075  | -0.064990 | 0.857254  |

**TS-2** Bond Energy LDA + GGA-XC= -35.85860588 a.u.

|       |           |           |           |
|-------|-----------|-----------|-----------|
| 1.C   | -0.512585 | 0.924589  | 4.849343  |
| 2.C   | -1.034340 | 0.422261  | 6.069623  |
| 3.C   | -0.198193 | 0.147666  | 7.152811  |
| 4.C   | 1.181242  | 0.381929  | 7.052050  |
| 5.C   | 1.703402  | 0.945814  | 5.878674  |
| 6.C   | 0.868060  | 1.231495  | 4.797262  |
| 7.C   | -1.393978 | 1.003001  | 3.689070  |
| 8.C   | -1.057703 | 1.289067  | 2.381689  |
| 9.C   | -0.642537 | -0.638351 | 1.294419  |
| 10.C  | -1.998565 | -1.253451 | 1.454634  |
| 11.O  | -3.088273 | -0.649759 | 1.520784  |
| 12.O  | -1.909298 | -2.649923 | 1.444235  |
| 13.C  | -3.231934 | -3.367418 | 1.363606  |
| 14.C  | 0.557214  | -1.160485 | 2.025755  |
| 15.C  | 0.345391  | -1.981089 | 3.312185  |
| 16.Rh | -0.272540 | 0.015834  | -0.663952 |
| 17.Rh | 0.231688  | 0.719973  | -3.054943 |
| 18.N  | -3.327428 | -3.222474 | -2.753236 |
| 19.O  | -4.128239 | -1.020561 | -3.173198 |
| 20.O  | -3.086860 | -5.372241 | -1.771643 |
| 21.C  | -4.271104 | -2.158088 | -2.693478 |
| 22.C  | -5.421087 | -2.690585 | -1.915261 |
| 23.C  | -6.601810 | -2.060661 | -1.552214 |

|      |           |           |           |
|------|-----------|-----------|-----------|
| 24.C | -7.520380 | -2.799095 | -0.786515 |
| 25.C | -7.245973 | -4.123819 | -0.412952 |
| 26.C | -6.038221 | -4.747395 | -0.780402 |
| 27.C | -5.133397 | -4.004251 | -1.528681 |
| 28.C | -3.758995 | -4.343635 | -2.005355 |
| 29.N | 3.024001  | -3.304748 | -1.070618 |
| 30.O | 1.125912  | -3.955508 | -2.347234 |
| 31.O | 4.540357  | -3.068102 | 0.740458  |
| 32.C | 1.821062  | -4.024413 | -1.320440 |
| 33.C | 1.562915  | -4.827581 | -0.100154 |
| 34.C | 0.479316  | -5.641997 | 0.199042  |
| 35.C | 0.452247  | -6.232116 | 1.474158  |
| 36.C | 1.484159  | -6.003808 | 2.397381  |
| 37.C | 2.573772  | -5.171317 | 2.080281  |
| 38.C | 2.588596  | -4.586808 | 0.820144  |
| 39.C | 3.531348  | -3.594206 | 0.224699  |
| 40.N | 3.358964  | 3.007807  | 0.566719  |
| 41.O | 4.207676  | 1.243019  | -0.779369 |
| 42.O | 2.822807  | 4.312614  | 2.477377  |
| 43.C | 4.194734  | 1.895124  | 0.277775  |
| 44.C | 5.010372  | 1.679949  | 1.504280  |
| 45.C | 6.014043  | 0.752539  | 1.744488  |
| 46.C | 6.651445  | 0.798131  | 2.997164  |
| 47.C | 6.273440  | 1.742400  | 3.964158  |
| 48.C | 5.238449  | 2.663469  | 3.714897  |
| 49.C | 4.619172  | 2.612003  | 2.472424  |
| 50.C | 3.511661  | 3.439413  | 1.907704  |
| 51.N | -3.364147 | 3.533415  | -0.321088 |
| 52.O | -1.121495 | 4.316296  | -0.144704 |
| 53.O | -5.539229 | 2.791721  | 0.275060  |
| 54.C | -2.233619 | 4.065337  | 0.354128  |
| 55.C | -2.635149 | 4.190478  | 1.781033  |
| 56.C | -1.877093 | 4.586518  | 2.874712  |
| 57.C | -2.470260 | 4.483418  | 4.144627  |
| 58.C | -3.785396 | 4.015096  | 4.289019  |
| 59.C | -4.546575 | 3.627342  | 3.170584  |
| 60.C | -3.943564 | 3.716672  | 1.922339  |
| 61.C | -4.436612 | 3.287109  | 0.582235  |
| 62.O | -1.353330 | -1.630642 | -1.566414 |
| 63.O | -0.846914 | -0.977273 | -3.732147 |
| 64.O | 1.508149  | -1.153841 | -0.822315 |
| 65.O | 1.964134  | -0.535262 | -3.008189 |
| 66.O | 0.987621  | 1.621210  | -0.015751 |
| 67.O | 1.351591  | 2.306831  | -2.196961 |
| 68.O | -1.939296 | 1.327549  | -0.736776 |
| 69.O | -1.522961 | 1.936357  | -2.931197 |
| 70.C | -1.349939 | -1.787975 | -2.865895 |
| 71.C | -1.980172 | -3.123860 | -3.355167 |
| 72.C | -1.961767 | -3.411993 | -4.900008 |
| 73.C | -2.562607 | -4.822017 | -5.143789 |
| 74.C | -2.777723 | -2.366898 | -5.700671 |
| 75.C | -0.493571 | -3.448940 | -5.395000 |
| 76.C | 2.209742  | -1.189379 | -1.928106 |
| 77.C | 3.460184  | -2.101339 | -1.825042 |
| 78.C | 4.299922  | -2.366604 | -3.123311 |
| 79.C | 3.458819  | -2.905336 | -4.307828 |

|       |           |           |           |
|-------|-----------|-----------|-----------|
| 80.C  | 5.411230  | -3.381917 | -2.751479 |
| 81.C  | 4.977963  | -1.035955 | -3.542118 |
| 82.C  | 1.511309  | 2.404573  | -0.926227 |
| 83.C  | 2.344951  | 3.574224  | -0.348260 |
| 84.C  | 2.917576  | 4.614946  | -1.371699 |
| 85.C  | 1.719271  | 5.288597  | -2.088745 |
| 86.C  | 3.669786  | 5.708908  | -0.567035 |
| 87.C  | 3.876576  | 3.980973  | -2.406582 |
| 88.C  | -2.169752 | 2.020399  | -1.819620 |
| 89.C  | -3.373932 | 2.989311  | -1.699232 |
| 90.C  | -3.548359 | 4.054314  | -2.835302 |
| 91.C  | -3.854148 | 3.310096  | -4.163655 |
| 92.C  | -4.786102 | 4.917498  | -2.480421 |
| 93.C  | -2.296052 | 4.967759  | -3.008142 |
| 94.C  | -3.857154 | -3.520020 | 2.744900  |
| 95.H  | 4.112223  | -3.446966 | -5.004503 |
| 96.H  | 2.672783  | -3.582702 | -3.976820 |
| 97.H  | 2.984990  | -2.081304 | -4.848537 |
| 98.H  | 6.127330  | -2.941273 | -2.046244 |
| 99.H  | 5.957757  | -3.667581 | -3.659043 |
| 100.H | 4.992535  | -4.289910 | -2.303173 |
| 101.H | 5.610074  | -1.219909 | -4.420770 |
| 102.H | 4.232454  | -0.279331 | -3.798631 |
| 103.H | 5.610234  | -0.636977 | -2.739521 |
| 104.H | 4.119583  | -1.576768 | -1.123827 |
| 105.H | -0.325686 | -5.787187 | -0.515880 |
| 106.H | -0.385305 | -6.866682 | 1.750935  |
| 107.H | 1.434046  | -6.468300 | 3.378212  |
| 108.H | 3.367136  | -4.975173 | 2.795076  |
| 109.H | -1.888623 | -5.609905 | -4.784274 |
| 110.H | -2.707387 | -4.960318 | -6.223574 |
| 111.H | -3.536220 | -4.945532 | -4.657671 |
| 112.H | -0.013069 | -2.474853 | -5.302619 |
| 113.H | -0.488634 | -3.747253 | -6.451540 |
| 114.H | 0.090588  | -4.182024 | -4.830759 |
| 115.H | -2.646477 | -1.360892 | -5.300511 |
| 116.H | -3.846727 | -2.613771 | -5.694759 |
| 117.H | -2.435093 | -2.366142 | -6.744078 |
| 118.H | -1.388370 | -3.901353 | -2.860995 |
| 119.H | -5.817188 | -5.770683 | -0.491745 |
| 120.H | -7.977199 | -4.674319 | 0.172324  |
| 121.H | -8.453867 | -2.335892 | -0.478228 |
| 122.H | -6.791884 | -1.030967 | -1.841598 |
| 123.H | -2.959109 | 2.828215  | -4.561809 |
| 124.H | -4.225389 | 4.038618  | -4.896316 |
| 125.H | -4.626288 | 2.541077  | -4.026490 |
| 126.H | -4.711880 | 5.325153  | -1.465892 |
| 127.H | -5.712435 | 4.334621  | -2.557824 |
| 128.H | -4.845997 | 5.758348  | -3.182968 |
| 129.H | -1.455309 | 4.631751  | -2.407931 |
| 130.H | -2.521381 | 6.000807  | -2.715976 |
| 131.H | -1.973011 | 4.972613  | -4.055719 |
| 132.H | -4.260042 | 2.340457  | -1.716998 |
| 133.H | -5.560600 | 3.251737  | 3.272039  |
| 134.H | -4.217353 | 3.939862  | 5.283330  |
| 135.H | -1.893789 | 4.746131  | 5.027150  |

|       |           |           |           |
|-------|-----------|-----------|-----------|
| 136.H | -0.853210 | 4.927116  | 2.750839  |
| 137.H | -2.099209 | 0.217587  | 6.150723  |
| 138.H | -0.613703 | -0.266586 | 8.068509  |
| 139.H | 1.840261  | 0.132245  | 7.880201  |
| 140.H | 2.767831  | 1.147376  | 5.797530  |
| 141.H | 1.292557  | 1.686308  | 3.911265  |
| 142.H | -0.093299 | 1.696238  | 2.109333  |
| 143.H | -1.872139 | 1.449626  | 1.685166  |
| 144.H | -2.439364 | 0.772556  | 3.891931  |
| 145.H | 1.277601  | -1.998872 | 3.890210  |
| 146.H | 0.056776  | -3.002948 | 3.058245  |
| 147.H | -0.432879 | -1.545724 | 3.942139  |
| 148.H | 1.089814  | -1.780200 | 1.286513  |
| 149.H | 1.245333  | -0.322427 | 2.190140  |
| 150.H | 2.103870  | 6.033528  | -2.796514 |
| 151.H | 1.126657  | 4.562892  | -2.644848 |
| 152.H | 1.067772  | 5.798950  | -1.369995 |
| 153.H | 3.113936  | 6.007241  | 0.329889  |
| 154.H | 3.792191  | 6.597441  | -1.199693 |
| 155.H | 4.666974  | 5.368722  | -0.262523 |
| 156.H | 4.842271  | 3.730910  | -1.953002 |
| 157.H | 3.451290  | 3.076153  | -2.842557 |
| 158.H | 4.059072  | 4.701545  | -3.215163 |
| 159.H | 1.645706  | 4.107360  | 0.305045  |
| 160.H | 4.940826  | 3.399740  | 4.455756  |
| 161.H | 6.793222  | 1.764635  | 4.918153  |
| 162.H | 7.449174  | 0.093562  | 3.215761  |
| 163.H | 6.286225  | 0.018116  | 0.992979  |
| 164.H | -2.960695 | -4.323130 | 0.917768  |
| 165.H | -3.876525 | -2.790948 | 0.700299  |
| 166.H | -3.220415 | -4.126910 | 3.398110  |
| 167.H | -4.834956 | -4.009787 | 2.639726  |
| 168.H | -4.015521 | -2.537705 | 3.199682  |

**TS-3 Bond Energy LDA + GGA-XC= -35.85696892**

|    |           |           |           |
|----|-----------|-----------|-----------|
| C  | -1.616043 | 1.321537  | 4.653538  |
| C  | -1.332421 | 0.941864  | 5.989812  |
| C  | -2.359433 | 0.608979  | 6.874302  |
| C  | -3.696218 | 0.663797  | 6.453021  |
| C  | -3.996031 | 1.100830  | 5.153892  |
| C  | -2.972243 | 1.435288  | 4.269765  |
| C  | -0.514225 | 1.498188  | 3.720218  |
| C  | -0.581667 | 1.675671  | 2.352171  |
| C  | -0.430613 | -0.468317 | 1.516177  |
| C  | 0.878668  | -0.777446 | 2.186802  |
| O  | 1.831986  | 0.014042  | 2.325273  |
| O  | 0.952730  | -2.111791 | 2.593460  |
| C  | 2.318179  | -2.561616 | 3.038425  |
| C  | -1.729034 | -1.162754 | 1.832820  |
| C  | -1.927984 | -1.968585 | 3.133907  |
| C  | 2.497663  | -2.420454 | 4.544095  |
| Rh | -0.169280 | -0.139961 | -0.532638 |
| Rh | 0.178584  | 0.112757  | -3.046233 |
| N  | -3.641336 | -3.386955 | -1.824274 |
| O  | -4.387254 | -1.265945 | -2.603915 |
| O  | -3.407381 | -5.320928 | -0.465670 |

C -4.546227 -2.295594 -1.924111  
C -5.687343 -2.646702 -1.033773  
C -6.871595 -1.960503 -0.806005  
C -7.800768 -2.544943 0.073156  
C -7.528700 -3.772259 0.697290  
C -6.315902 -4.449573 0.469848  
C -5.407963 -3.864860 -0.403497  
C -4.061537 -4.328824 -0.852454  
N 2.782866 -3.911930 -0.654694  
O 0.591871 -4.257712 -1.495701  
O 4.706051 -4.037660 0.736744  
C 1.472074 -4.462789 -0.646347  
C 1.394718 -5.315687 0.569169  
C 0.288248 -5.923815 1.149373  
C 0.486502 -6.580722 2.376573  
C 1.761080 -6.650917 2.962822  
C 2.873209 -6.039512 2.356916  
C 2.656427 -5.345681 1.170410  
C 3.549939 -4.399551 0.433912  
N 3.612891 2.748593 -0.007512  
O 4.314533 0.736743 -1.064235  
O 3.184788 4.359004 1.683947  
C 4.359935 1.544062 -0.120011  
C 5.182137 1.470098 1.117919  
C 6.136639 0.534519 1.489281  
C 6.797655 0.733459 2.714305  
C 6.490162 1.834557 3.528330  
C 5.504819 2.764779 3.148307  
C 4.864332 2.560609 1.933629  
C 3.803424 3.361357 1.256833  
N -3.140246 3.547949 -0.611755  
O -0.865112 4.247065 -0.649350  
O -5.323620 3.033956 0.167194  
C -1.963549 4.139332 -0.076534  
C -2.315170 4.551661 1.308544  
C -1.509548 5.103896 2.294527  
C -2.089927 5.319481 3.557109  
C -3.438141 5.012071 3.794409  
C -4.245913 4.461838 2.782501  
C -3.654161 4.221640 1.548901  
C -4.196265 3.546477 0.335931  
O -1.402382 -1.838184 -1.069916  
O -1.105714 -1.545539 -3.347255  
O 1.530826 -1.449515 -0.544891  
O 1.784899 -1.308006 -2.841887  
O 1.156165 1.484349 -0.293899  
O 1.495219 1.717079 -2.574586  
O -1.798587 1.231459 -0.732469  
O -1.454125 1.509512 -3.008133  
C -1.571595 -2.173957 -2.323825  
C -2.349588 -3.497303 -2.532442  
C -2.483198 -4.058849 -3.994647  
C -3.190481 -5.435569 -3.903271  
C -3.287691 -3.132661 -4.931982  
C -1.066742 -4.291231 -4.578403  
C 2.082263 -1.783610 -1.681792



C 3.243796 -2.814020 -1.543668  
C 3.927490 -3.318341 -2.863024  
C 2.924508 -3.981812 -3.831960  
C 5.013004 -4.352464 -2.470904  
C 4.628747 -2.121339 -3.552069  
C 1.698260 2.040068 -1.344448  
C 2.607819 3.232021 -0.978233  
C 3.194669 4.085610 -2.150023  
C 2.007184 4.706094 -2.929360  
C 4.027874 5.233984 -1.518414  
C 4.086987 3.271625 -3.110335  
C -2.049758 1.774329 -1.897242  
C -3.226361 2.785406 -1.877518  
C -3.458351 3.667360 -3.153569  
C -3.915149 2.738640 -4.309186  
C -4.620668 4.640844 -2.829290  
C -2.197378 4.480223 -3.583032  
H -5.030480 1.164976 4.826103  
H -4.495737 0.369836 7.128315  
H -2.121826 0.288900 7.885706  
H -0.297974 0.879197 6.318712  
H -3.222854 1.781261 3.277416  
H 0.480916 1.428806 4.157452  
H 0.328845 1.946516 1.827219  
H -1.515305 1.891941 1.850247  
H -1.281616 -2.849187 3.132862  
H -2.977071 -2.293982 3.172176  
H -1.720185 -1.376289 4.026949  
H -2.538616 -0.432475 1.700490  
H -1.870727 -1.855813 0.984604  
H 3.055957 -1.984877 2.480540  
H 2.318564 -3.601395 2.748282  
H -0.694920 -5.855289 0.690770  
H -0.363155 -7.028000 2.885496  
H 1.883143 -7.164122 3.913091  
H 3.856665 -6.062199 2.817371  
H 5.760851 -3.915180 -1.799414  
H 5.522735 -4.693239 -3.380965  
H 4.575214 -5.230578 -1.982399  
H 3.478187 -4.524153 -4.610639  
H 2.282010 -4.697271 -3.312373  
H 2.287556 -3.233173 -4.308100  
H 5.164589 -2.485830 -4.438105  
H 3.907363 -1.363899 -3.864905  
H 5.356547 -1.648179 -2.880922  
H 4.005475 -2.286053 -0.956746  
H -1.777471 -4.228511 -1.954604  
H -0.562053 -3.345071 -4.778774  
H -1.159474 -4.847854 -5.520052  
H -0.447118 -4.876998 -3.893533  
H -2.610246 -6.141792 -3.296437  
H -3.290195 -5.852677 -4.913733  
H -4.196093 -5.348464 -3.475933  
H -2.883398 -2.117958 -4.923959  
H -4.345724 -3.094611 -4.650044  
H -3.226982 -3.527244 -5.955826

H -6.095127 -5.398445 0.950040  
H -8.267564 -4.206387 1.365211  
H -8.742772 -2.040076 0.268983  
H -7.063985 -1.009360 -1.293973  
H -4.122148 2.162936 -1.748416  
H -3.090125 2.112621 -4.657695  
H -4.269491 3.358809 -5.143227  
H -4.739285 2.082254 -3.998023  
H -4.359703 5.306941 -1.998384  
H -5.538560 4.098780 -2.570102  
H -4.822243 5.259898 -3.712574  
H -1.381152 4.385679 -2.870345  
H -2.441985 5.546473 -3.672272  
H -1.828395 4.133702 -4.554321  
H -5.287705 4.211008 2.958524  
H -3.856576 5.178940 4.782649  
H -1.480608 5.715488 4.364537  
H -0.464103 5.326359 2.101140  
H 3.542757 -2.657815 4.790203  
H 1.840345 -3.114950 5.080414  
H 2.292214 -1.396202 4.868161  
H 2.400638 5.376354 -3.704019  
H 1.406326 3.934116 -3.413985  
H 1.358811 5.289436 -2.265103  
H 3.531145 5.662970 -0.639840  
H 4.158127 6.034748 -2.258083  
H 5.022642 4.881292 -1.217962  
H 4.932936 2.819475 -2.583430  
H 3.517303 2.475986 -3.596046  
H 4.486641 3.945597 -3.880507  
H 1.957153 3.890681 -0.392514  
H 5.254908 3.617350 3.772989  
H 7.022875 1.971020 4.465442  
H 7.559256 0.026649 3.032208  
H 6.359070 -0.316957 0.853247

---

**Results from Conformational Searching on  $\text{Rh}_2(\text{S-PTTL})_4$  using MacroModel, followed by optimization at OLYP/TZP (small frozen core)**

**Lowest energy structure**

side view

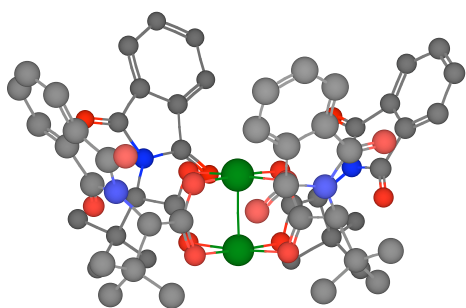

top view

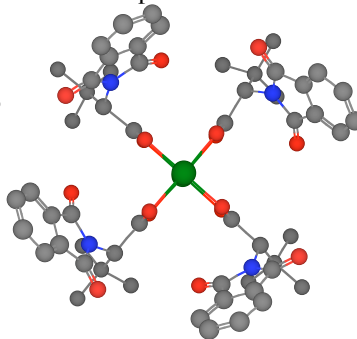

LDA+ GGA-XC= -30.52974824 a.u.

|    |           |           |           |
|----|-----------|-----------|-----------|
| Rh | 0.60386   | -0.885409 | -0.729477 |
| N  | -0.682024 | 2.335457  | -3.886279 |
| O  | -2.7979   | 3.137411  | -3.287994 |
| O  | 1.644041  | 2.184     | -4.083064 |
| C  | -1.590825 | 3.282756  | -3.365393 |
| C  | -0.776421 | 4.455356  | -2.936636 |
| C  | -1.159662 | 5.660752  | -2.362346 |
| C  | -0.144717 | 6.559243  | -2.01393  |
| C  | 1.20423   | 6.248861  | -2.228664 |
| C  | 1.58109   | 5.032889  | -2.808498 |
| C  | 0.56402   | 4.156019  | -3.161003 |
| C  | 0.645109  | 2.797358  | -3.761269 |
| N  | 1.619422  | -4.074062 | 2.558969  |
| O  | 3.237711  | -3.237535 | 4.027694  |
| O  | -0.467854 | -4.645255 | 1.670787  |
| C  | 2.085586  | -3.546835 | 3.784142  |
| C  | 0.897894  | -3.449243 | 4.678726  |
| C  | 0.79271   | -3.01309  | 5.993276  |
| C  | -0.484612 | -2.994927 | 6.564573  |
| C  | -1.611128 | -3.394715 | 5.833851  |
| C  | -1.494845 | -3.834201 | 4.510611  |
| C  | -0.220928 | -3.857675 | 3.958657  |
| C  | 0.220479  | -4.251302 | 2.591956  |
| O  | -0.278659 | 0.337697  | -2.122748 |
| O  | 0.107551  | -1.135586 | -3.792779 |
| O  | 1.476309  | -2.175864 | 0.628029  |
| O  | 1.870204  | -3.725005 | -0.968948 |
| C  | -0.332353 | -0.035307 | -3.33681  |
| C  | -1.09297  | 0.967662  | -4.257514 |
| C  | -1.206446 | 0.679669  | -5.801631 |
| C  | -2.020848 | -0.62069  | -5.996905 |
| C  | 0.148219  | 0.556241  | -6.52549  |
| C  | -2.013502 | 1.829125  | -6.446379 |
| C  | 1.878227  | -3.313455 | 0.232145  |
| C  | 2.485449  | -4.191281 | 1.370244  |
| C  | 2.996884  | -5.64412  | 1.037937  |
| C  | 1.921148  | -6.578166 | 0.448422  |
| C  | 4.182852  | -5.523131 | 0.052516  |
| C  | 3.539149  | -6.27922  | 2.338391  |
| H  | -2.206564 | 5.887828  | -2.180498 |
| H  | -0.40432  | 7.510554  | -1.554475 |
| H  | 1.970053  | 6.960247  | -1.928068 |
| H  | 2.624753  | 4.769518  | -2.96028  |
| H  | 1.668983  | -2.689004 | 6.548533  |
| H  | -0.608898 | -2.653721 | 7.590064  |
| H  | -2.592482 | -3.351743 | 6.300768  |
| H  | -2.36422  | -4.126336 | 3.926955  |
| H  | -2.118045 | 0.908289  | -3.87491  |
| H  | -1.489073 | -1.501547 | -5.635021 |
| H  | -2.221666 | -0.763368 | -7.064562 |
| H  | -2.985713 | -0.573689 | -5.480782 |
| H  | 0.766329  | -0.237592 | -6.101331 |
| H  | 0.719729  | 1.486981  | -6.486666 |
| H  | -0.028523 | 0.318822  | -7.581739 |

|    |           |           |           |
|----|-----------|-----------|-----------|
| H  | -1.492659 | 2.78894   | -6.380676 |
| H  | -2.998833 | 1.945805  | -5.983408 |
| H  | -2.16629  | 1.61259   | -7.509344 |
| H  | 3.379363  | -3.62737  | 1.66434   |
| H  | 1.109057  | -6.763313 | 1.156096  |
| H  | 2.378101  | -7.546216 | 0.208834  |
| H  | 1.484527  | -6.175976 | -0.467579 |
| H  | 4.959058  | -4.850634 | 0.436821  |
| H  | 3.874255  | -5.155165 | -0.926866 |
| H  | 4.640555  | -6.508915 | -0.086525 |
| H  | 2.754377  | -6.425201 | 3.086523  |
| H  | 4.331566  | -5.674677 | 2.790966  |
| H  | 3.958872  | -7.265412 | 2.110836  |
| Rh | 1.012917  | -2.490908 | -2.445744 |
| N  | 5.129348  | 0.650791  | -1.339873 |
| O  | 5.059642  | 2.976761  | -1.597339 |
| O  | 5.379757  | -1.451353 | -0.335382 |
| C  | 5.357063  | 1.988219  | -0.95     |
| C  | 6.011784  | 1.92946   | 0.386384  |
| C  | 6.456941  | 2.949233  | 1.21689   |
| C  | 7.000274  | 2.581267  | 2.453194  |
| C  | 7.090803  | 1.236027  | 2.832924  |
| C  | 6.638844  | 0.216184  | 1.988321  |
| C  | 6.103189  | 0.593078  | 0.76484   |
| C  | 5.517424  | -0.24347  | -0.318383 |
| N  | -3.937705 | -2.359349 | -0.638504 |
| O  | -4.605747 | -2.857483 | 1.548939  |
| O  | -3.64014  | -1.18722  | -2.63988  |
| C  | -4.652819 | -2.147623 | 0.559971  |
| C  | -5.442808 | -0.899979 | 0.361364  |
| C  | -6.329736 | -0.250109 | 1.20898   |
| C  | -6.889711 | 0.950166  | 0.756332  |
| C  | -6.560193 | 1.475202  | -0.499605 |
| C  | -5.667831 | 0.811368  | -1.348    |
| C  | -5.129278 | -0.384212 | -0.892891 |
| C  | -4.157648 | -1.302288 | -1.545847 |
| O  | 2.447607  | -0.035466 | -1.209038 |
| O  | 2.833538  | -1.566486 | -2.825969 |
| O  | -1.244885 | -1.7992   | -0.417803 |
| O  | -0.846569 | -3.326982 | -2.034878 |
| C  | 3.130709  | -0.527193 | -2.16026  |
| C  | 4.383565  | 0.303843  | -2.562483 |
| C  | 5.260876  | -0.169565 | -3.78638  |
| C  | 5.902862  | -1.558763 | -3.605366 |
| C  | 4.383753  | -0.161626 | -5.06144  |
| C  | 6.382823  | 0.870809  | -4.005181 |
| C  | -1.56864  | -2.795386 | -1.136147 |
| C  | -2.944436 | -3.436831 | -0.790136 |
| C  | -3.422974 | -4.700657 | -1.606861 |
| C  | -4.798372 | -5.141258 | -1.057646 |
| C  | -3.556476 | -4.467059 | -3.125378 |
| C  | -2.432788 | -5.859936 | -1.342717 |
| H  | 6.374871  | 3.990753  | 0.917929  |
| H  | 7.350894  | 3.351947  | 3.135982  |
| H  | 7.509552  | 0.983162  | 3.804228  |
| H  | 6.689294  | -0.830289 | 2.276898  |

|   |           |           |           |
|---|-----------|-----------|-----------|
| H | -6.569418 | -0.655628 | 2.188176  |
| H | -7.5826   | 1.493678  | 1.394787  |
| H | -6.995546 | 2.420749  | -0.81476  |
| H | -5.38807  | 1.219483  | -2.315725 |
| H | 3.947988  | 1.261157  | -2.868772 |
| H | 6.463654  | -1.81653  | -4.512318 |
| H | 5.155683  | -2.336821 | -3.438522 |
| H | 6.604393  | -1.58042  | -2.767066 |
| H | 3.895115  | 0.806902  | -5.209735 |
| H | 3.610464  | -0.929715 | -5.039886 |
| H | 5.018595  | -0.350366 | -5.934518 |
| H | 5.98019   | 1.874972  | -4.172228 |
| H | 6.964015  | 0.592257  | -4.89128  |
| H | 7.078442  | 0.918243  | -3.162184 |
| H | -2.800086 | -3.788774 | 0.237332  |
| H | -5.572212 | -4.385702 | -1.222246 |
| H | -4.760486 | -5.362737 | 0.013615  |
| H | -5.117414 | -6.052013 | -1.576475 |
| H | -4.325302 | -3.725975 | -3.359675 |
| H | -3.847323 | -5.408286 | -3.60806  |
| H | -2.619446 | -4.134413 | -3.574863 |
| H | -2.301329 | -6.042107 | -0.27058  |
| H | -1.448856 | -5.674161 | -1.774515 |
| H | -2.827367 | -6.779327 | -1.789649 |

---

### Second lowest Energy Conformation (E = 3.86 kcal/mol)

This conformation differs from the lowest energy (chiral crown) conformation in that one of the ligands is rotated so that the C-C bond to the *t*-Bu group is ~perpendicular to the Rh-Rh bond.

Side view

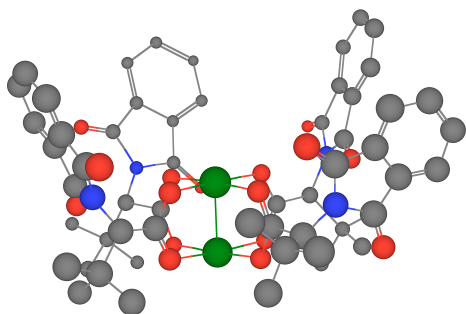

Top view

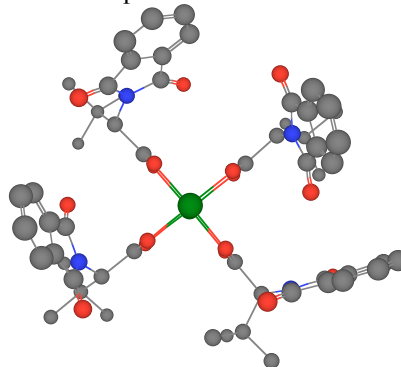

LDA+ GGA-XC= -30.52359317

|    |           |           |           |
|----|-----------|-----------|-----------|
| Rh | -0.006476 | -0.874424 | -0.844731 |
| N  | -1.197066 | 2.311005  | -4.05939  |
| O  | 1.113303  | 2.033402  | -4.275068 |
| O  | -3.262076 | 3.227467  | -3.454896 |
| C  | 0.152357  | 2.704898  | -3.954188 |
| C  | 0.14788   | 4.074517  | -3.376126 |
| C  | 1.211271  | 4.905878  | -3.051761 |
| C  | 0.90216   | 6.145314  | -2.481782 |
| C  | -0.426347 | 6.523007  | -2.2481   |
| C  | -1.489195 | 5.672384  | -2.57257  |
| C  | -1.172675 | 4.444572  | -3.138226 |

|   |           |           |           |
|---|-----------|-----------|-----------|
| C | -2.051408 | 3.311905  | -3.542604 |
| N | 1.769384  | -3.624287 | 2.53653   |
| O | -0.558905 | -3.864994 | 2.587166  |
| O | 3.938926  | -3.017752 | 3.171386  |
| C | 0.478098  | -3.499592 | 3.097418  |
| C | 0.660581  | -2.845822 | 4.423498  |
| C | -0.279939 | -2.505134 | 5.385862  |
| C | 0.187342  | -1.88247  | 6.548319  |
| C | 1.550737  | -1.616255 | 6.727197  |
| C | 2.489359  | -1.9679   | 5.750474  |
| C | 2.014998  | -2.584963 | 4.600001  |
| C | 2.741143  | -3.068845 | 3.392047  |
| O | -0.953421 | 0.313989  | -2.239685 |
| O | -0.582407 | -1.183181 | -3.893066 |
| O | 0.938033  | -2.123552 | 0.518018  |
| O | 1.271434  | -3.706088 | -1.062359 |
| C | -0.986167 | -0.062929 | -3.454722 |
| C | -1.683767 | 0.963499  | -4.403511 |
| C | -1.806808 | 0.653664  | -5.943791 |
| C | -2.576319 | 1.819331  | -6.605648 |
| C | -2.662813 | -0.621832 | -6.121075 |
| C | -0.459346 | 0.473924  | -6.670793 |
| C | 1.349683  | -3.258263 | 0.126706  |
| C | 2.09429   | -4.12029  | 1.189053  |
| C | 2.079094  | -5.697357 | 1.016855  |
| C | 0.674341  | -6.289794 | 0.78503   |
| C | 2.993209  | -6.07377  | -0.172964 |
| C | 2.688589  | -6.339826 | 2.282578  |
| H | 2.238968  | 4.592189  | -3.214664 |
| H | 1.706526  | 6.82168   | -2.201931 |
| H | -0.631808 | 7.490193  | -1.794882 |
| H | -2.521772 | 5.950024  | -2.378569 |
| H | -1.334907 | -2.711056 | 5.230615  |
| H | -0.519013 | -1.594374 | 7.324075  |
| H | 1.88144   | -1.123337 | 7.638766  |
| H | 3.548195  | -1.760751 | 5.8793    |
| H | -2.715482 | 0.982365  | -4.030168 |
| H | -3.56186  | 1.968224  | -6.152788 |
| H | -2.725656 | 1.59838   | -7.668163 |
| H | -2.029447 | 2.764487  | -6.54331  |
| H | -3.626329 | -0.536708 | -5.60424  |
| H | -2.154795 | -1.515843 | -5.756619 |
| H | -2.877677 | -0.767849 | -7.185519 |
| H | 0.141643  | -0.324202 | -6.230766 |
| H | 0.135903  | 1.390091  | -6.660188 |
| H | -0.649593 | 0.21579   | -7.71986  |
| H | 3.141456  | -3.81775  | 1.062595  |
| H | 0.01695   | -6.139178 | 1.642875  |
| H | 0.76108   | -7.370117 | 0.615528  |
| H | 0.185502  | -5.858227 | -0.091166 |
| H | 4.002246  | -5.661033 | -0.054964 |
| H | 2.59364   | -5.727715 | -1.126768 |
| H | 3.086918  | -7.16465  | -0.221913 |
| H | 2.08303   | -6.157792 | 3.175161  |
| H | 3.704506  | -5.981143 | 2.478302  |
| H | 2.74075   | -7.425183 | 2.142164  |

Rh 0.367496 -2.511048 -2.535011  
N 4.527368 0.504229 -1.491604  
O 4.681627 -1.643133 -0.576583  
O 4.516444 2.836776 -1.653849  
C 4.859051 -0.443258 -0.498682  
C 5.439838 0.329487 0.632888  
C 5.929959 -0.114725 1.853047  
C 6.397468 0.855348 2.745737  
C 6.36595 2.216423 2.417467  
C 5.862318 2.651858 1.186296  
C 5.400862 1.682488 0.306007  
C 4.778831 1.816501 -1.040931  
N -3.769281 -3.712071 0.599979  
O -3.235873 -5.993169 0.64729  
O -4.471025 -1.590947 1.35414  
C -3.559543 -4.969715 1.221462  
C -3.826206 -4.782196 2.670028  
C -3.710282 -5.674872 3.726388  
C -3.998689 -5.193899 5.007376  
C -4.399614 -3.865949 5.2071  
C -4.508514 -2.975296 4.133096  
C -4.203811 -3.460751 2.86851  
C -4.176734 -2.751288 1.555669  
O 1.820265 -0.037491 -1.402732  
O 2.170124 -1.591441 -3.009438  
O -1.844386 -1.819004 -0.423948  
O -1.457079 -3.364611 -2.038257  
C 2.495018 -0.55829 -2.349453  
C 3.784634 0.224894 -2.731761  
C 4.661856 -0.259693 -3.951843  
C 5.821257 0.747532 -4.130423  
C 5.254833 -1.673344 -3.79174  
C 3.809393 -0.201756 -5.241425  
C -2.156785 -2.839253 -1.106486  
C -3.495368 -3.57815 -0.842283  
C -4.690609 -3.127917 -1.78491  
C -4.39242 -3.668766 -3.204162  
C -5.993815 -3.790736 -1.292904  
C -4.884218 -1.600836 -1.871704  
H 5.927479 -1.171055 2.105139  
H 6.78103 0.548786 3.716351  
H 6.72925 2.945973 3.137771  
H 5.822244 3.706856 0.929102  
H -3.390809 -6.700088 3.558943  
H -3.905338 -5.857713 5.864057  
H -4.6219 -3.523318 6.215436  
H -4.810961 -1.941132 4.274931  
H 3.397668 1.20778 -3.019646  
H 6.409344 0.468396 -5.011714  
H 6.502295 0.755608 -3.274445  
H 5.454966 1.767931 -4.283399  
H 4.479806 -2.428586 -3.649088  
H 5.94625 -1.737283 -2.947637  
H 5.815969 -1.930618 -4.698783  
H 2.995431 -0.927557 -5.236526  
H 4.449853 -0.423604 -6.102731

|   |           |           |           |
|---|-----------|-----------|-----------|
| H | 3.3777    | 0.791539  | -5.39726  |
| H | -3.278396 | -4.610959 | -1.124555 |
| H | -4.308752 | -4.762091 | -3.211592 |
| H | -3.469172 | -3.260554 | -3.620154 |
| H | -5.211841 | -3.39307  | -3.877445 |
| H | -5.888917 | -4.877609 | -1.202159 |
| H | -6.793046 | -3.596329 | -2.017359 |
| H | -6.324695 | -3.393647 | -0.329478 |
| H | -3.993193 | -1.099952 | -2.261103 |
| H | -5.112752 | -1.158904 | -0.901864 |
| H | -5.710039 | -1.378589 | -2.558591 |

---

### Third lowest Energy Conformation (E = 4.27 kcal/mol)

This conformation differs from the lowest energy (chiral crown) conformation in that one of the ligands is rotated so that the C-N bond is ~parallel to the Rh-Rh bond.

Side view

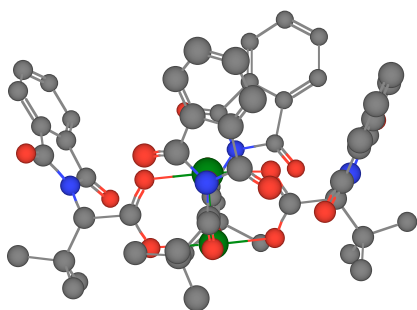

Top view

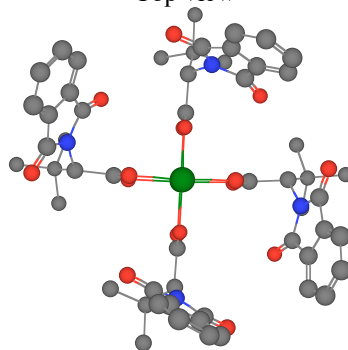

LDA+ GGA-XC= -30.52294097 a.u.

|    |           |           |           |
|----|-----------|-----------|-----------|
| Rh | 0.470983  | -0.881805 | -0.627056 |
| N  | -0.850119 | 2.285063  | -3.782883 |
| O  | 1.474407  | 2.101144  | -3.926836 |
| O  | -2.966035 | 3.102884  | -3.206994 |
| C  | 0.478678  | 2.730612  | -3.631841 |
| C  | 0.403709  | 4.093212  | -3.043485 |
| C  | 1.425835  | 4.968651  | -2.703885 |
| C  | 1.056234  | 6.193866  | -2.140271 |
| C  | -0.290832 | 6.511915  | -1.923815 |
| C  | -1.311433 | 5.614879  | -2.261941 |
| C  | -0.935728 | 4.402246  | -2.826347 |
| C  | -1.756722 | 3.237146  | -3.266764 |
| N  | 2.578325  | -3.439524 | 2.716535  |
| O  | 0.31415   | -3.222358 | 3.340778  |
| O  | 4.911344  | -3.273495 | 2.822659  |
| C  | 1.494006  | -2.995809 | 3.516229  |
| C  | 2.097212  | -2.22733  | 4.640604  |
| C  | 1.481527  | -1.574906 | 5.699591  |
| C  | 2.307882  | -0.922768 | 6.620562  |
| C  | 3.701604  | -0.941396 | 6.479332  |
| C  | 4.310347  | -1.611512 | 5.413566  |
| C  | 3.47968   | -2.245669 | 4.499154  |
| C  | 3.80527   | -3.019604 | 3.272968  |
| O  | -0.483804 | 0.300759  | -2.016626 |



O -0.113325 -1.201351 -3.664202  
O 1.416691 -2.110484 0.734648  
O 1.817775 -3.671336 -0.849805  
C -0.538026 -0.087378 -3.225452  
C -1.257801 0.921766 -4.172491  
C -1.301752 0.644129 -5.723  
C -2.098742 -0.657331 -5.973397  
C 0.084473 0.52785 -6.384666  
C -2.079783 1.798394 -6.393907  
C 1.852297 -3.235164 0.346576  
C 2.543675 -4.129667 1.414365  
C 2.121024 -5.660175 1.45186  
C 2.732716 -6.314302 2.708697  
C 0.594644 -5.873315 1.455241  
C 2.719649 -6.377288 0.219188  
H 2.467987 4.699136 -2.856525  
H 1.826474 6.907518 -1.856472  
H -0.544868 7.47022 -1.476165  
H -2.356697 5.851432 -2.083303  
H 0.39972 -1.57045 5.797579  
H 1.86477 -0.391746 7.459613  
H 4.317574 -0.423135 7.210788  
H 5.39041 -1.631505 5.296544  
H -2.298993 0.868691 -3.835708  
H -1.578645 -1.538796 -5.596982  
H -2.243463 -0.787288 -7.051902  
H -3.088844 -0.62521 -5.506088  
H 0.685493 -0.261075 -5.929318  
H 0.649365 1.460712 -6.323342  
H -0.041752 0.285567 -7.446939  
H -1.57052 2.760242 -6.286462  
H -3.08998 1.902397 -5.984324  
H -2.173471 1.597123 -7.466424  
H 3.599022 -4.121567 1.115023  
H 3.823038 -6.212851 2.731725  
H 2.499031 -7.384727 2.704773  
H 2.328943 -5.897372 3.635361  
H 0.125964 -5.413042 0.58247  
H 0.120639 -5.464341 2.348511  
H 0.376467 -6.947428 1.414706  
H 3.805445 -6.239296 0.15523  
H 2.279345 -6.029701 -0.716036  
H 2.527855 -7.453149 0.303029  
Rh 0.871005 -2.496446 -2.327295  
N 4.998717 0.564308 -1.325241  
O 4.927043 2.901347 -1.388621  
O 5.247159 -1.611757 -0.510612  
C 5.232084 1.863329 -0.828572  
C 5.919901 1.68876 0.482636  
C 6.385915 2.631176 1.38974  
C 6.99191 2.154109 2.557648  
C 7.128707 0.78051 2.794525  
C 6.649936 -0.161468 1.878827  
C 6.042513 0.325098 0.730232  
C 5.410204 -0.414855 -0.394594  
N -4.067852 -2.361488 -0.635416

|   |           |           |           |
|---|-----------|-----------|-----------|
| O | -4.87208  | -2.816943 | 1.514351  |
| O | -3.659202 | -1.241195 | -2.646357 |
| C | -4.839977 | -2.112301 | 0.523886  |
| C | -5.578989 | -0.843854 | 0.267008  |
| C | -6.483603 | -0.149107 | 1.059217  |
| C | -6.989569 | 1.053559  | 0.552745  |
| C | -6.594556 | 1.536588  | -0.701339 |
| C | -5.68568  | 0.828041  | -1.492639 |
| C | -5.197555 | -0.366624 | -0.983082 |
| C | -4.22181  | -1.320181 | -1.57274  |
| O | 2.271374  | 0.021821  | -1.181085 |
| O | 2.630817  | -1.528095 | -2.790604 |
| O | -1.373691 | -1.835183 | -0.26754  |
| O | -0.929221 | -3.399609 | -1.83853  |
| C | 2.940537  | -0.486014 | -2.137569 |
| C | 4.215473  | 0.308021  | -2.542747 |
| C | 5.050305  | -0.162814 | -3.797185 |
| C | 6.199027  | 0.849577  | -4.004351 |
| C | 5.653769  | -1.576046 | -3.671487 |
| C | 4.155631  | -0.100704 | -5.05717  |
| C | -1.67944  | -2.843898 | -0.978104 |
| C | -3.090264 | -3.458624 | -0.717288 |
| C | -3.538834 | -4.70347  | -1.58277  |
| C | -2.587282 | -5.888478 | -1.294472 |
| C | -4.949279 | -5.133837 | -1.122836 |
| C | -3.58058  | -4.440915 | -3.102698 |
| H | 6.273975  | 3.694669  | 1.199954  |
| H | 7.362407  | 2.861164  | 3.296424  |
| H | 7.610246  | 0.441689  | 3.70886   |
| H | 6.729534  | -1.229192 | 2.054937  |
| H | -6.775699 | -0.523102 | 2.035635  |
| H | -7.696603 | 1.630327  | 1.144095  |
| H | -6.993498 | 2.481452  | -1.060763 |
| H | -5.353764 | 1.203012  | -2.456799 |
| H | 3.819776  | 1.295532  | -2.802483 |
| H | 6.771162  | 0.571133  | -4.896532 |
| H | 6.896007  | 0.864066  | -3.161505 |
| H | 5.822174  | 1.867184  | -4.153406 |
| H | 4.891631  | -2.332183 | -3.478698 |
| H | 6.395162  | -1.638397 | -2.87182  |
| H | 6.157735  | -1.834248 | -4.611046 |
| H | 3.345753  | -0.830182 | -5.029434 |
| H | 4.768416  | -0.316901 | -5.939848 |
| H | 3.714073  | 0.890855  | -5.195504 |
| H | -3.034546 | -3.819097 | 0.317907  |
| H | -2.537035 | -6.119234 | -0.223705 |
| H | -1.573858 | -5.708003 | -1.654339 |
| H | -2.965446 | -6.783433 | -1.801641 |
| H | -4.972857 | -5.394482 | -0.059758 |
| H | -5.257365 | -6.018336 | -1.692005 |
| H | -5.699093 | -4.357666 | -1.299854 |
| H | -2.62184  | -4.090547 | -3.486671 |
| H | -4.339379 | -3.701911 | -3.369316 |
| H | -3.832016 | -5.374647 | -3.620538 |

**Starting Conformation A (E = 8.18 kcal/mol)**

Minimized conformation of  $\text{Rh}_2(\text{S-PTTL})_4$  similar to that in the crystal structure of phenylalanine derived  $\text{Rh}_2(\text{S-PTPA})_4$ .

Side view

Top view

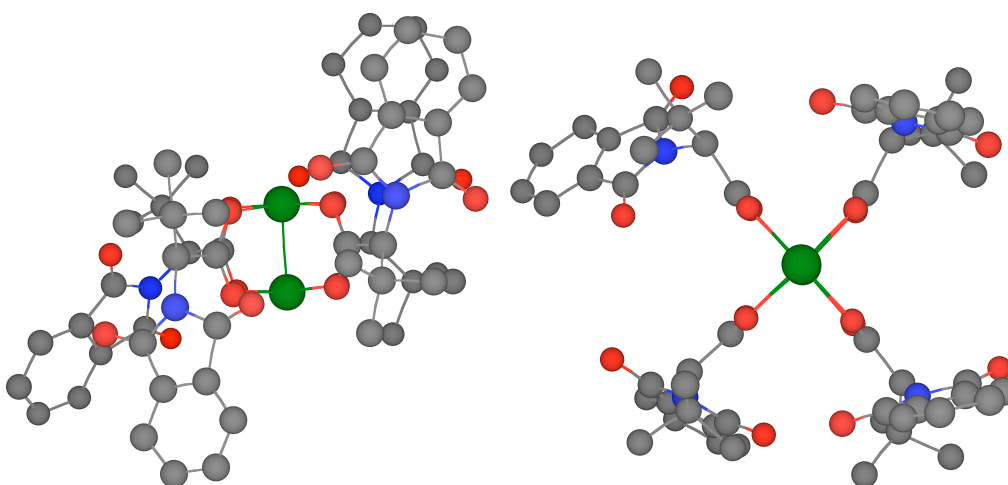

LDA+ GGA-XC= -30.51671392 a.u.

|    |             |             |             |
|----|-------------|-------------|-------------|
| Rh | 0.70141800  | 1.11297100  | 0.41845500  |
| Rh | 0.85458000  | -1.03922300 | -0.59042600 |
| O  | 1.76442100  | 1.87617900  | -1.23308000 |
| O  | 1.94046500  | -0.18497200 | -2.14785100 |
| C  | 2.08940700  | 1.07780400  | -2.16607300 |
| C  | 2.56466500  | 1.69967400  | -3.51017500 |
| N  | 2.81766500  | 3.13792800  | -3.34699300 |
| C  | 1.85649900  | 4.07650900  | -3.78302500 |
| C  | 2.31484800  | 5.40817400  | -3.31296700 |
| C  | 1.71444700  | 6.65591800  | -3.42222400 |
| C  | 2.38822000  | 7.74352200  | -2.85693400 |
| C  | 3.62608300  | 7.57594000  | -2.22142900 |
| C  | 4.21642800  | 6.31220100  | -2.11045300 |
| C  | 3.52822100  | 5.23652000  | -2.65490800 |
| C  | 3.85019900  | 3.78013900  | -2.62572700 |
| O  | 0.85769600  | 3.81104000  | -4.42842400 |
| O  | 4.80068900  | 3.24854000  | -2.08902200 |
| C  | 3.59199600  | 0.88207500  | -4.40087300 |
| C  | 4.08096000  | 1.79251500  | -5.54844900 |
| O  | -0.90928300 | -0.59979000 | -1.64320600 |
| O  | -1.06977900 | 1.42161700  | -0.64256000 |
| C  | -1.46827100 | 0.52915800  | -1.45116800 |
| C  | -2.67450400 | 0.84444700  | -2.39015500 |
| N  | -3.61331100 | -0.28793400 | -2.40210700 |
| C  | -4.23483800 | -0.88492500 | -1.28418900 |
| C  | -5.14066800 | -1.93725600 | -1.82956800 |
| C  | -6.02367300 | -2.78477200 | -1.17332800 |
| C  | -6.79294300 | -3.64627800 | -1.96457300 |

|   |             |             |             |
|---|-------------|-------------|-------------|
| C | -6.66597900 | -3.65764200 | -3.35979200 |
| C | -5.75995600 | -2.81133600 | -4.00837500 |
| C | -5.00749100 | -1.95545900 | -3.21518000 |
| C | -3.99598100 | -0.93275900 | -3.59818900 |
| O | -4.05421200 | -0.57690100 | -0.12290400 |
| O | -3.56812300 | -0.67630000 | -4.70862000 |
| C | -3.35526400 | 2.27207200  | -2.31151500 |
| C | -4.47134400 | 2.34145800  | -3.37945900 |
| O | -0.27973200 | -1.81096000 | 0.96582000  |
| O | -0.40751200 | 0.21757300  | 1.95121400  |
| C | -0.67987800 | -1.02139100 | 1.87818300  |
| C | -1.68795200 | -1.60973400 | 2.90986900  |
| N | -1.61417900 | -3.08251900 | 2.89369200  |
| C | -2.70211100 | -3.87954200 | 2.46765500  |
| C | -2.20201200 | -5.28117700 | 2.40244000  |
| C | -2.84615600 | -6.45194600 | 2.02378900  |
| C | -2.09185600 | -7.63052500 | 2.02409700  |
| C | -0.74133400 | -7.62603400 | 2.39744200  |
| C | -0.10477800 | -6.44153600 | 2.78233200  |
| C | -0.86255300 | -5.27834600 | 2.77232600  |
| C | -0.46268000 | -3.87911100 | 3.08511000  |
| O | -3.82300800 | -3.47639400 | 2.21652900  |
| O | 0.63282900  | -3.49286000 | 3.43726800  |
| C | -1.78267000 | -0.94214500 | 4.34385000  |
| C | -2.82448200 | -1.72692800 | 5.17151500  |
| O | 2.45361300  | 0.72844700  | 1.45035100  |
| O | 2.61377700  | -1.32583700 | 0.52511100  |
| C | 3.01632700  | -0.39975400 | 1.29921800  |
| C | 4.38322400  | -0.61763800 | 2.01507800  |
| N | 4.75746100  | 0.57190300  | 2.79980200  |
| C | 4.06273700  | 1.17770400  | 3.87846900  |
| C | 4.87826700  | 2.35885000  | 4.28031400  |
| C | 4.66517200  | 3.27591600  | 5.30046400  |
| C | 5.61170400  | 4.29372600  | 5.45754700  |
| C | 6.72813200  | 4.37818100  | 4.61511600  |
| C | 6.93043400  | 3.44947400  | 3.58805400  |
| C | 5.98278200  | 2.44459000  | 3.44112200  |
| C | 5.90842400  | 1.32248300  | 2.46653000  |
| O | 3.02219500  | 0.80809300  | 4.38083400  |
| O | 6.67854500  | 1.06974700  | 1.55806500  |
| C | 4.67753200  | -1.99602000 | 2.75171000  |
| C | 6.18899300  | -2.03539500 | 3.07528300  |
| C | 2.84295900  | -0.30694900 | -5.05154000 |
| C | 4.80704800  | 0.33866700  | -3.62218100 |
| C | -2.30582000 | 3.34045100  | -2.69156100 |
| C | -3.97280000 | 2.61358800  | -0.94037300 |
| C | -2.31494300 | 0.50491400  | 4.20294100  |
| C | -0.44485700 | -0.91392200 | 5.10779400  |
| C | 4.37986400  | -3.19316300 | 1.82037200  |
| C | 3.88193500  | -2.17940700 | 4.05785200  |
| H | 1.63423000  | 1.70384500  | -4.09310700 |
| H | 0.75104300  | 6.77171700  | -3.91231300 |
| H | 1.94256600  | 8.73496300  | -2.90235400 |
| H | 4.12770200  | 8.44305500  | -1.79754800 |
| H | 5.16905700  | 6.16841200  | -1.60805100 |
| H | 4.69834000  | 2.62188600  | -5.19300300 |

|   |             |             |             |
|---|-------------|-------------|-------------|
| H | 3.24579400  | 2.20619400  | -6.12465200 |
| H | 4.69414000  | 1.20169900  | -6.23796000 |
| H | -2.22281800 | 0.79321600  | -3.38861300 |
| H | -6.10670600 | -2.77348800 | -0.08976900 |
| H | -7.50516400 | -4.31805100 | -1.49043800 |
| H | -7.28223700 | -4.33600500 | -3.94590600 |
| H | -5.64966400 | -2.81349200 | -5.08956100 |
| H | -5.28740200 | 1.64051600  | -3.18088300 |
| H | -4.08954500 | 2.14589600  | -4.38623900 |
| H | -4.90371400 | 3.34803000  | -3.37746200 |
| H | -2.65603100 | -1.41054400 | 2.43230900  |
| H | -3.89131500 | -6.44542400 | 1.72630800  |
| H | -2.55587100 | -8.56588800 | 1.71991200  |
| H | -0.17973500 | -8.55735200 | 2.37894800  |
| H | 0.94453000  | -6.42073800 | 3.06499600  |
| H | -2.52008700 | -2.76133700 | 5.35414100  |
| H | -3.80537500 | -1.73996600 | 4.68513300  |
| H | -2.94259100 | -1.24496000 | 6.14807700  |
| H | 5.09194800  | -0.58740100 | 1.17732900  |
| H | 3.79424500  | 3.20014900  | 5.94619600  |
| H | 5.47895900  | 5.03358500  | 6.24400400  |
| H | 7.44688900  | 5.18119600  | 4.76274800  |
| H | 7.79119100  | 3.50801800  | 2.92720000  |
| H | 6.49598200  | -1.22897900 | 3.74680100  |
| H | 6.80243300  | -1.97581000 | 2.16980500  |
| H | 6.42338700  | -2.98080500 | 3.57692700  |
| H | 1.97309500  | 0.02946800  | -5.62890200 |
| H | 2.50125000  | -1.03490400 | -4.31550800 |
| H | 3.51764700  | -0.82056400 | -5.74580300 |
| H | 4.50081900  | -0.34678300 | -2.82666000 |
| H | 5.40035700  | 1.13740500  | -3.17533400 |
| H | 5.45224800  | -0.22332500 | -4.30853100 |
| H | -1.83953500 | 3.12622700  | -3.65877600 |
| H | -1.51563300 | 3.43527100  | -1.94683400 |
| H | -2.80100200 | 4.31407500  | -2.77961100 |
| H | -3.23734900 | 2.57642600  | -0.13496500 |
| H | -4.79391500 | 1.94124500  | -0.67926500 |
| H | -4.38156000 | 3.63087200  | -0.97868100 |
| H | -3.22433900 | 0.54797400  | 3.59184700  |
| H | -1.57825800 | 1.17587200  | 3.76218400  |
| H | -2.56711200 | 0.88925400  | 5.19778100  |
| H | 0.33391100  | -0.38348100 | 4.55606500  |
| H | -0.07698500 | -1.91766900 | 5.33229800  |
| H | -0.58653000 | -0.39057800 | 6.06166600  |
| H | 4.83697300  | -3.07544400 | 0.83190000  |
| H | 3.31076700  | -3.35645600 | 1.68530700  |
| H | 4.80127500  | -4.09713500 | 2.27533000  |
| H | 2.80731400  | -2.07794600 | 3.90503000  |
| H | 4.18589200  | -1.47056700 | 4.83161000  |
| H | 4.06561600  | -3.18798800 | 4.44834300  |

---

X-ray structural analysis for compounds **joef082s** and **joef083**: Crystallographic details are reported in tables 1S and 3S. Bond distances and angles are presented in tables 2S and 4S. Crystals were selected and mounted on plastic mesh using Paratone® oil flash-cooled to 120 K. Data were collected on a Brüker-AXS APEX CCD diffractometer with graphite-monochromated Mo-K $\alpha$  radiation ( $\lambda=0.71073$  Å). Unit cell parameters were obtained from 60 data frames,  $0.3^\circ$   $\omega$ , from three different sections of the Ewald sphere. The systematic absences in the data and the unit cell parameters were consistent to  $P2_1$  and  $P2_1/m$ . The enantiomerically resolved compounds are consistent with the noncentrosymmetrical space group option. The data-sets were treated with SADABS absorption corrections based on redundant multiscan data (Sheldrick, G.M. 2008, Acta Cryst. A64, 112-122). The structures were solved using direct methods and refined with full-matrix, least-squares procedures on  $F^2$ . The Flack parameter (Flack, H.D. 1983, Acta Cryst. A39, 876-881: 13930 Friedel pairs) in **joef082s** refined to 0.02(2) indicating that the true hand of the data was determined. The absolute configuration of **joef083** was assigned from the synthetic method. The compound **joef082s** consistently deposits as multiple, cracked crystals and the data presented herein represent the best of several trials. Two symmetry unique but chemically identical molecules are found in the asymmetric unit of **joef082s** (figures 1S and 2S). Common 1,2 and 1,3 atom distances were restrained for equivalent atoms across all the bridging ligands in **joef082s**. Four toluene and two ethyl acetate molecules of solvation per asymmetric unit in **joef082s** were treated as diffused contributions using Squeeze (Spek, A. L. 2003, J. Appl. Cryst. 36, 7-13). The A and B level alerts for **joef082s** in checkCIF (<http://checkcif.iucr.org>) arise from either Squeeze consequences or from small, unresolvable, apparent disorder causing larger than usual  $U_{eq}$  ranges and apparent Hirshfeld failures however the connectivity is corroborated by noncrystallographic information. The n-butyl chain in **joef083** (figure 3S) displayed increasing yet unresolvable disorder toward the methyl end causing a larger than usual  $U_{eq}$  range for C, and associated H, resulting in a level B Alert in checkCIF. All non-hydrogen atoms were refined with anisotropic displacement parameters. All hydrogen atoms were treated as idealized contributions. Structure factors are contained in the SHELXTL 6.12 program library (Sheldrick, G. M., *op. cit.*). Structure CIFs are deposited with the Cambridge Crystallographic Data Centre under nos. CCDC 725972 &

726150.

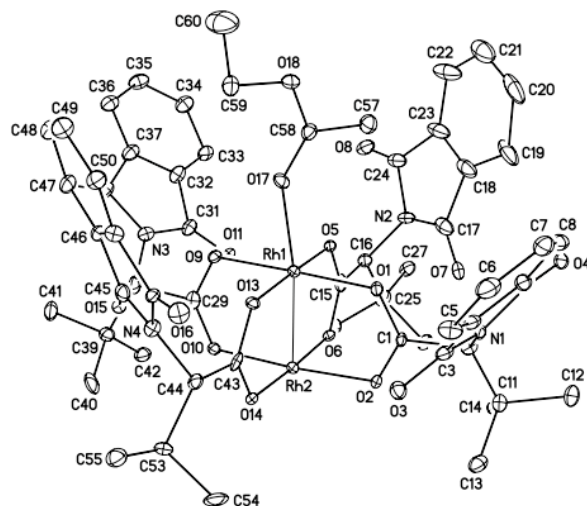

Fig 1S. Molecular diagram and labelling scheme for the first symmetry unique compound molecule in **joef082s** at 30% ellipsoids. Hydrogen atoms omitted for clarity.

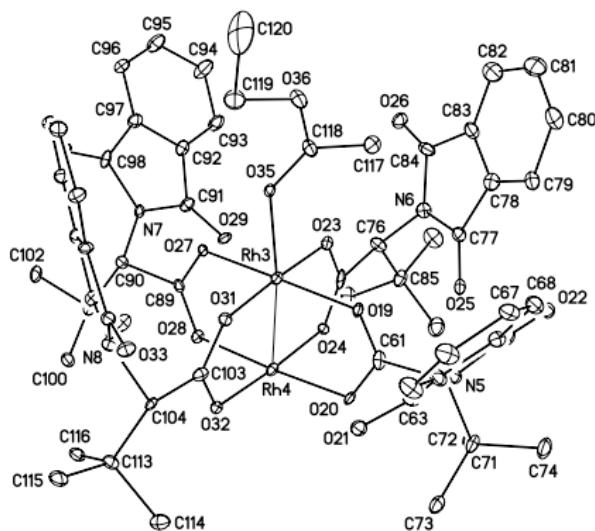

Fig 2S. Molecular diagram and labelling scheme for the second symmetry unique compound molecule in **joef082s** at 30% ellipsoids. Hydrogen atoms omitted for clarity.

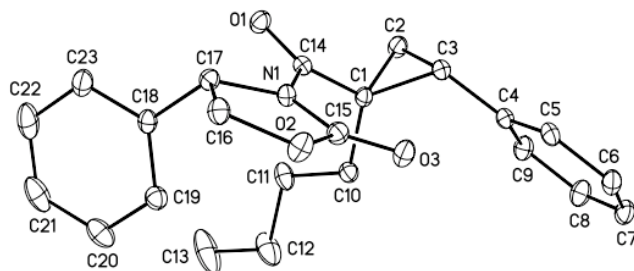

Fig 3S. Molecular diagram and labelling scheme for **joef083** at 30% ellipsoids. Hydrogen atoms omitted for clarity.

Table 1S. Crystal data and structure refinement for **joef082s**.

|                                 |                                                                                |                    |
|---------------------------------|--------------------------------------------------------------------------------|--------------------|
| Identification code             | joef082s                                                                       |                    |
| Empirical formula               | C <sub>78</sub> H <sub>88</sub> N <sub>4</sub> O <sub>20</sub> Rh <sub>2</sub> |                    |
| Formula weight                  | 1607.34                                                                        |                    |
| Temperature                     | 120(2) K                                                                       |                    |
| Wavelength                      | 0.71073 Å                                                                      |                    |
| Crystal system, space group     | Monoclinic, <i>P</i> 2 <sub>1</sub>                                            |                    |
| Unit cell dimensions            | a = 14.182(4) Å                                                                | alpha = 90 °       |
|                                 | b = 20.088(6) Å                                                                | beta = 96.456(6) ° |
|                                 | c = 28.868(9) Å                                                                | gamma = 90 °       |
| Volume                          | 8172(4) Å <sup>3</sup>                                                         |                    |
| Z, Calculated density           | 4, 1.306 g/cm <sup>3</sup>                                                     |                    |
| Absorption coefficient          | 0.473 mm <sup>-1</sup>                                                         |                    |
| F(000)                          | 3336                                                                           |                    |
| Crystal size                    | 0.17 x 0.12 x 0.09 mm                                                          |                    |
| Theta range for data collection | 1.45 to 25.00 °                                                                |                    |
| Limiting indices                | -16 ≤ h ≤ 16, -23 ≤ k ≤ 23, -34 ≤ l ≤ 34                                       |                    |
| Reflections collected / unique  | 81795 / 28757 [R(int) = 0.1366]                                                |                    |
| Completeness to theta = 25.00   | 99.9 %                                                                         |                    |
| Absorption correction           | Semi-empirical from equivalents                                                |                    |
| Max. and min. transmission      | 0.9587 and 0.9239                                                              |                    |
| Refinement method               | Full-matrix least-squares on F <sup>2</sup>                                    |                    |
| Data / restraints / parameters  | 28757 / 813 / 1513                                                             |                    |



|                                      |                                      |
|--------------------------------------|--------------------------------------|
| Goodness-of-fit on $F^2$             | 1.020                                |
| Final R indices [ $I > 2\sigma(I)$ ] | R1 = 0.0718, wR2 = 0.1053            |
| R indices (all data)                 | R1 = 0.1229, wR2 = 0.1173            |
| Absolute structure parameter         | 0.02(2)                              |
| Largest diff. peak and hole          | 1.020 and -0.754 e $\text{\AA}^{-3}$ |

Table 2S. Selected bond lengths [ $\text{\AA}$ ] and angles [ $^\circ$ ] for **joef082s**.

|                   |            |                   |            |             |            |
|-------------------|------------|-------------------|------------|-------------|------------|
| Rh(1)-O(5)        | 1.966(6)   | Rh(1)-O(13)       | 1.987(7)   | Rh(1)-O(1)  | 1.997(7)   |
| Rh(1)-O(9)        | 2.034(7)   | Rh(1)-O(17)       | 2.205(7)   | Rh(1)-Rh(2) | 2.3786(12) |
| Rh(2)-O(6)        | 1.976(7)   | Rh(2)-O(10)       | 2.040(7)   | Rh(2)-O(14) | 2.028(7)   |
| Rh(2)-O(2)        | 2.049(7)   | Rh(3)-O(31)       | 1.931(6)   | Rh(3)-O(23) | 1.985(6)   |
| Rh(3)-O(27)       | 1.998(7)   | Rh(3)-O(19)       | 2.042(7)   | Rh(3)-O(35) | 2.237(6)   |
| Rh(3)-Rh(4)       | 2.3800(12) | Rh(4)-O(32)       | 1.999(6)   | Rh(4)-O(24) | 1.994(7)   |
| Rh(4)-O(20)       | 2.032(7)   | Rh(4)-O(28)       | 2.025(6)   |             |            |
| O(5)-Rh(1)-O(13)  | 177.3(3)   | O(5)-Rh(1)-O(1)   | 88.1(3)    |             |            |
| O(13)-Rh(1)-O(1)  | 92.9(3)    | O(5)-Rh(1)-O(9)   | 88.6(3)    |             |            |
| O(13)-Rh(1)-O(9)  | 90.2(3)    | O(1)-Rh(1)-O(9)   | 176.2(3)   |             |            |
| O(5)-Rh(1)-O(17)  | 99.1(3)    | O(13)-Rh(1)-O(17) | 83.3(3)    |             |            |
| O(1)-Rh(1)-O(17)  | 97.3(3)    | O(9)-Rh(1)-O(17)  | 85.2(3)    |             |            |
| O(5)-Rh(1)-Rh(2)  | 88.06(17)  | O(13)-Rh(1)-Rh(2) | 89.49(18)  |             |            |
| O(1)-Rh(1)-Rh(2)  | 87.88(18)  | O(9)-Rh(1)-Rh(2)  | 89.96(19)  |             |            |
| O(17)-Rh(1)-Rh(2) | 171.27(19) | O(6)-Rh(2)-O(10)  | 91.3(3)    |             |            |
| O(6)-Rh(2)-O(14)  | 177.5(3)   | O(10)-Rh(2)-O(14) | 88.4(3)    |             |            |
| O(6)-Rh(2)-O(2)   | 87.0(3)    | O(10)-Rh(2)-O(2)  | 176.1(3)   |             |            |
| O(14)-Rh(2)-O(2)  | 93.2(3)    | O(6)-Rh(2)-Rh(1)  | 90.06(19)  |             |            |
| O(10)-Rh(2)-Rh(1) | 87.5(2)    | O(14)-Rh(2)-Rh(1) | 87.48(18)  |             |            |
| O(2)-Rh(2)-Rh(1)  | 89.05(18)  | O(31)-Rh(3)-O(23) | 176.9(3)   |             |            |
| O(31)-Rh(3)-O(27) | 92.1(3)    | O(23)-Rh(3)-O(27) | 88.8(3)    |             |            |
| O(31)-Rh(3)-O(19) | 90.7(3)    | O(23)-Rh(3)-O(19) | 88.2(3)    |             |            |
| O(27)-Rh(3)-O(19) | 176.1(3)   | O(31)-Rh(3)-O(35) | 85.1(2)    |             |            |
| O(23)-Rh(3)-O(35) | 97.9(2)    | O(27)-Rh(3)-O(35) | 88.0(2)    |             |            |
| O(19)-Rh(3)-O(35) | 94.9(2)    | O(31)-Rh(3)-Rh(4) | 88.70(18)  |             |            |
| O(23)-Rh(3)-Rh(4) | 88.32(19)  | O(27)-Rh(3)-Rh(4) | 88.51(16)  |             |            |
| O(19)-Rh(3)-Rh(4) | 88.90(19)  | O(35)-Rh(3)-Rh(4) | 172.79(16) |             |            |
| O(32)-Rh(4)-O(24) | 176.9(3)   | O(32)-Rh(4)-O(20) | 92.1(3)    |             |            |
| O(24)-Rh(4)-O(20) | 88.7(3)    | O(32)-Rh(4)-O(28) | 87.7(2)    |             |            |

|                   |           |                   |           |
|-------------------|-----------|-------------------|-----------|
| O(24)-Rh(4)-O(28) | 91.3(3)   | O(20)-Rh(4)-O(28) | 176.3(3)  |
| O(32)-Rh(4)-Rh(3) | 88.50(17) | O(24)-Rh(4)-Rh(3) | 88.54(18) |
| O(20)-Rh(4)-Rh(3) | 87.6(2)   | O(28)-Rh(4)-Rh(3) | 88.65(17) |

Table 3S. Crystal data and structure refinement for **joef083**.

|                                   |                                                  |                     |
|-----------------------------------|--------------------------------------------------|---------------------|
| Identification code               | joef083                                          |                     |
| Empirical formula                 | C <sub>23</sub> H <sub>25</sub> N O <sub>3</sub> |                     |
| Formula weight                    | 363.44                                           |                     |
| Temperature                       | 120(2) K                                         |                     |
| Wavelength                        | 0.71073 Å                                        |                     |
| Crystal system, space group       | Monoclinic, <i>P</i> 2 <sub>1</sub>              |                     |
| Unit cell dimensions              | a = 11.961(4) Å                                  | alpha = 90 °        |
|                                   | b = 5.5326(19) Å                                 | beta = 109.747(5) ° |
|                                   | c = 15.785(5) Å                                  | gamma = 90 °        |
| Volume                            | 983.1(6) Å <sup>3</sup>                          |                     |
| Z, Calculated density             | 2, 1.228 g/cm <sup>3</sup>                       |                     |
| Absorption coefficient            | 0.081 mm <sup>-1</sup>                           |                     |
| F(000)                            | 388                                              |                     |
| Crystal size                      | 0.24 x 0.14 x 0.10 mm                            |                     |
| Theta range for data collection   | 1.37 to 28.29 °                                  |                     |
| Limiting indices                  | -15<=h<=15, -7<=k<=7, -21<=l<=21                 |                     |
| Reflections collected / unique    | 13561 / 2695 [R(int) = 0.0305]                   |                     |
| Completeness to theta = 25.00     | 100.0 %                                          |                     |
| Absorption correction             | Semi-empirical from equivalents                  |                     |
| Max. and min. transmission        | 0.9923 and 0.9807                                |                     |
| Refinement method                 | Full-matrix least-squares on F <sup>2</sup>      |                     |
| Data / restraints / parameters    | 2695 / 1 / 245                                   |                     |
| Goodness-of-fit on F <sup>2</sup> | 1.048                                            |                     |
| Final R indices [I>2sigma(I)]     | R1 = 0.0374, wR2 = 0.1015                        |                     |
| R indices (all data)              | R1 = 0.0430, wR2 = 0.1123                        |                     |
| Largest diff. peak and hole       | 0.360 and -0.262 e Å <sup>-3</sup>               |                     |

Table 4S. Bond lengths [ $\text{\AA}$ ] and angles [ $^\circ$ ] for **joef083**.

|                   |            |                   |            |             |          |
|-------------------|------------|-------------------|------------|-------------|----------|
| N(1)-C(15)        | 1.388(2)   | N(1)-C(14)        | 1.406(2)   | N(1)-C(17)  | 1.467(2) |
| O(1)-C(14)        | 1.209(2)   | O(2)-C(15)        | 1.353(2)   | O(2)-C(16)  | 1.438(2) |
| O(3)-C(15)        | 1.200(2)   | C(1)-C(14)        | 1.505(2)   | C(1)-C(2)   | 1.509(2) |
| C(1)-C(10)        | 1.513(2)   | C(1)-C(3)         | 1.533(2)   | C(2)-C(3)   | 1.505(3) |
| C(3)-C(4)         | 1.488(2)   | C(4)-C(5)         | 1.398(3)   | C(4)-C(9)   | 1.399(2) |
| C(5)-C(6)         | 1.386(3)   | C(6)-C(7)         | 1.395(3)   | C(7)-C(8)   | 1.388(3) |
| C(8)-C(9)         | 1.397(3)   | C(10)-C(11)       | 1.533(2)   | C(11)-C(12) | 1.522(4) |
| C(12)-C(13)       | 1.530(4)   | C(16)-C(17)       | 1.541(2)   | C(17)-C(18) | 1.513(2) |
| C(18)-C(23)       | 1.387(3)   | C(18)-C(19)       | 1.393(3)   | C(19)-C(20) | 1.395(3) |
| C(20)-C(21)       | 1.390(4)   | C(21)-C(22)       | 1.373(4)   | C(22)-C(23) | 1.392(3) |
| C(15)-N(1)-C(14)  | 128.39(14) | C(15)-N(1)-C(17)  | 112.18(14) |             |          |
| C(14)-N(1)-C(17)  | 118.89(14) | C(15)-O(2)-C(16)  | 110.97(14) |             |          |
| C(14)-C(1)-C(2)   | 115.70(15) | C(14)-C(1)-C(10)  | 111.62(13) |             |          |
| C(2)-C(1)-C(10)   | 120.34(15) | C(14)-C(1)-C(3)   | 118.83(14) |             |          |
| C(2)-C(1)-C(3)    | 59.28(11)  | C(10)-C(1)-C(3)   | 121.82(15) |             |          |
| C(3)-C(2)-C(1)    | 61.16(11)  | C(4)-C(3)-C(2)    | 124.21(15) |             |          |
| C(4)-C(3)-C(1)    | 122.60(15) | C(2)-C(3)-C(1)    | 59.55(11)  |             |          |
| C(5)-C(4)-C(9)    | 117.82(17) | C(5)-C(4)-C(3)    | 118.62(15) |             |          |
| C(9)-C(4)-C(3)    | 123.56(16) | C(6)-C(5)-C(4)    | 121.71(17) |             |          |
| C(5)-C(6)-C(7)    | 119.89(17) | C(8)-C(7)-C(6)    | 119.33(19) |             |          |
| C(7)-C(8)-C(9)    | 120.51(18) | C(8)-C(9)-C(4)    | 120.68(18) |             |          |
| C(1)-C(10)-C(11)  | 112.67(16) | C(12)-C(11)-C(10) | 111.7(2)   |             |          |
| C(11)-C(12)-C(13) | 112.2(3)   | O(1)-C(14)-N(1)   | 117.64(16) |             |          |
| O(1)-C(14)-C(1)   | 123.24(16) | N(1)-C(14)-C(1)   | 118.70(15) |             |          |
| O(3)-C(15)-O(2)   | 122.19(17) | O(3)-C(15)-N(1)   | 128.71(17) |             |          |
| O(2)-C(15)-N(1)   | 109.10(15) | O(2)-C(16)-C(17)  | 106.36(14) |             |          |
| N(1)-C(17)-C(18)  | 112.03(13) | N(1)-C(17)-C(16)  | 101.14(13) |             |          |
| C(18)-C(17)-C(16) | 113.12(15) | C(23)-C(18)-C(19) | 119.68(17) |             |          |
| C(23)-C(18)-C(17) | 120.24(17) | C(19)-C(18)-C(17) | 120.05(16) |             |          |

|                   |            |                   |          |
|-------------------|------------|-------------------|----------|
| C(18)-C(19)-C(20) | 119.91(19) | C(21)-C(20)-C(19) | 119.7(2) |
| C(22)-C(21)-C(20) | 120.3(2)   | C(21)-C(22)-C(23) | 120.2(2) |
| C(18)-C(23)-C(22) | 120.1(2)   |                   |          |

---
