# Supplementary material
Source: PubMed Central journal article supplement (PMC2738984)
Supplement: NIHMS116798-supplement-4_si_004.pdf [file NIHMS116798-supplement-4_si_004.pdf]

## Supporting Information

### The Chiral Crown Conformation of $\text{Rh}_2(\text{S-PTTL})_4$ : Enantioselective Cyclopropanation with $\alpha$ -Alkyl- $\alpha$ -diazoesters

Andrew DeAngelis, Olga Dmitrenko, Glenn P. A. Yap, and Joseph M. Fox\*

Brown Laboratories, Department of Chemistry and Biochemistry, University of Delaware,  
Newark, DE 19716

| <b>Experimental Section</b>                              | <b>Page</b> |
|----------------------------------------------------------|-------------|
| General Considerations                                   | S-3         |
| Optimization Table                                       | S-4         |
| Assignment of absolute stereochemistry                   | S-5         |
| Experimental procedures                                  | S-5         |
| <b>NMR, GC, and HPLC data</b>                            |             |
| GC trace of <b>2</b>                                     | S-25        |
| HPLC trace of <b>2</b>                                   | S-26        |
| $^1\text{H}$ and $^{13}\text{C}$ NMR spectra of <b>3</b> | S-27        |
| GC trace of <b>3</b>                                     | S-28        |
| HPLC traces of <b>3</b>                                  | S-29        |
| GC trace of <b>4</b>                                     | S-30        |
| HPLC traces of <b>4</b>                                  | S-31        |
| $^1\text{H}$ and $^{13}\text{C}$ NMR spectra of <b>5</b> | S-32        |
| GC trace of <b>5</b>                                     | S-33        |
| HPLC traces of <b>5</b>                                  | S-34        |
| $^1\text{H}$ and $^{13}\text{C}$ NMR spectra of <b>6</b> | S-35        |

|                                                           |      |
|-----------------------------------------------------------|------|
| GC trace of <b>6</b>                                      | S-36 |
| GC trace of <b>7</b>                                      | S-37 |
| $^1\text{H}$ and $^{13}\text{C}$ NMR spectra of <b>8</b>  | S-38 |
| GC trace of <b>8</b>                                      | S-39 |
| HPLC traces of <b>8</b>                                   | S-40 |
| $^1\text{H}$ and $^{13}\text{C}$ NMR spectra of <b>9</b>  | S-41 |
| GC trace of <b>9</b>                                      | S-42 |
| GC trace of <b>10</b>                                     | S-43 |
| HPLC traces of <b>10</b>                                  | S-44 |
| $^1\text{H}$ and $^{13}\text{C}$ NMR spectra of <b>11</b> | S-45 |
| $^1\text{H}$ and $^{13}\text{C}$ NMR spectra of <b>12</b> | S-46 |
| GC trace of <b>12</b>                                     | S-47 |
| HPLC traces of <b>12</b>                                  | S-48 |
| $^1\text{H}$ and $^{13}\text{C}$ NMR spectra of <b>13</b> | S-49 |
| GC trace of <b>13</b>                                     | S-50 |
| HPLC traces of <b>13</b>                                  | S-51 |
| $^1\text{H}$ and $^{13}\text{C}$ NMR spectra of <b>15</b> | S-52 |
| HPLC traces of <b>15</b>                                  | S-53 |
| $^1\text{H}$ and $^{13}\text{C}$ NMR spectra of <b>16</b> | S-54 |
| HPLC traces of <b>16</b>                                  | S-55 |
| $^1\text{H}$ and $^{13}\text{C}$ NMR spectra of <b>17</b> | S-56 |
| HPLC traces of <b>17</b>                                  | S-57 |
| $^1\text{H}$ and $^{13}\text{C}$ NMR spectra of <b>18</b> | S-58 |
| HPLC traces of <b>18</b>                                  | S-59 |
| $^1\text{H}$ and $^{13}\text{C}$ NMR spectra of <b>19</b> | S-60 |
| $^1\text{H}$ and $^{13}\text{C}$ NMR spectra of <b>20</b> | S-61 |
| References                                                | S-62 |

## Experimental Procedures

### General Considerations

All non-aqueous reactions were carried out in glassware that was flame-dried under vacuum and cooled under nitrogen.  $\text{CH}_2\text{Cl}_2$ , toluene, diethyl ether, and hexanes were dried with columns packed with activated neutral alumina. THF was distilled from sodium/benzophenone. Chromatography was performed on silica gel (silicycle 40-63D, 60Å). For  $^{13}\text{C}$  NMR, multiplicities were distinguished using a ATP pulse sequence: typical methylene and quaternary carbons appear 'up' (u); methine and methyl carbons appear 'down' (dn). NMR yields were determined by addition of 1 equivalent of mesitylene as an internal standard to the crude reaction mixture. Reagents were used directly as purchased from commercial sources without further purification. Ethyl 2-diazopropanoate, ethyl 2-diazobutanoate, ethyl 2-diazohehexanoate, ethyl 2-diazo-octanoate, and ethyl 2-diazo-5-methylhexanoate were prepared from the corresponding  $\beta$ -ketoesters according to literature protocol.<sup>1</sup> (*E*)-1-phenylbutadiene was prepared according to a literature procedure.<sup>2</sup> Dirhodium tetrakis triphenylacetate,<sup>3</sup> dirhodium tetrakis *N*-phthaloyl (*S*)-valinate, and dirhodium tetrakis *N*-phthaloyl (*S*)-*tert*-leucinate were also prepared according to methods described in the literature.<sup>4</sup> The "racemic" (+/-)  $\text{Rh}_2(\text{PTV})_4$  was prepared by mixing an equimolar amount of each enantiomer, and then dissolving the mixture in  $\text{CH}_2\text{Cl}_2$  and subsequently evaporating the solvent. X-ray quality crystals of  $\text{Rh}_2(\text{S-PTTL})_4$  were grown by slow evaporation of 20:2:1 drop hexanes/toluene/ethyl acetate. Enantiomeric excesses were measured on materials directly after chromatography (i.e. the reported ee's have not been enhanced through crystallization).

## Optimization Table

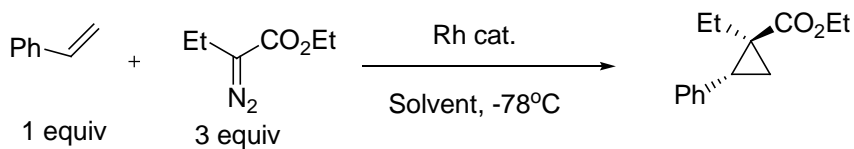

| Entry    | Rh cat.                                   | Solvent                         | Yield      | dr          | ee         |
|----------|-------------------------------------------|---------------------------------|------------|-------------|------------|
| 1        | Rh <sub>2</sub> (S-DOSP) <sub>4</sub>     | CH <sub>2</sub> Cl <sub>2</sub> | 26%        | 84:16       | 0%         |
| 2        | Rh <sub>2</sub> (R-PTAD) <sub>4</sub>     | CH <sub>2</sub> Cl <sub>2</sub> | 51%        | 82:18       | -30%       |
| 3        | Rh <sub>2</sub> (R-PTAD) <sub>4</sub>     | PhMe                            | 98%        | 90:10       | -70%       |
| 4        | Rh <sub>2</sub> (S-PTPA) <sub>4</sub>     | PhMe                            | 24%        | >99:1       | 28%        |
| 5        | Rh <sub>2</sub> (S-PTV) <sub>4</sub>      | PhMe                            | 95%        | 85:15       | 73%        |
| 6        | Rh <sub>2</sub> (S-PTTL) <sub>4</sub>     | CH <sub>2</sub> Cl <sub>2</sub> | 94%        | 80:20       | 50%        |
| <b>7</b> | <b>Rh<sub>2</sub>(S-PTTL)<sub>4</sub></b> | <b>Hexanes</b>                  | <b>95%</b> | <b>92:8</b> | <b>79%</b> |
| 8        | Rh <sub>2</sub> (S-PTTL) <sub>4</sub>     | Et <sub>2</sub> O               | 92%        | 89:11       | 75%        |
| 9        | Rh <sub>2</sub> (S-PTTL) <sub>4</sub>     | PhMe                            | 99%        | 90:10       | 72%        |

\*Bold face denotes optimized conditions

## Assignment of absolute configuration

For the cyclopropanations catalyzed by  $\text{Rh}_2(S\text{-PTTL})_4$  the absolute configuration was determined by x-ray diffraction of compound **20**, which was prepared from compound **19** (96% ee) and (*S*)-(+)-4-phenyl 2-oxazolidinone. From the x-ray data, it was determined that the absolute configuration of the cyclopropane is 1*S*, 2*R*.

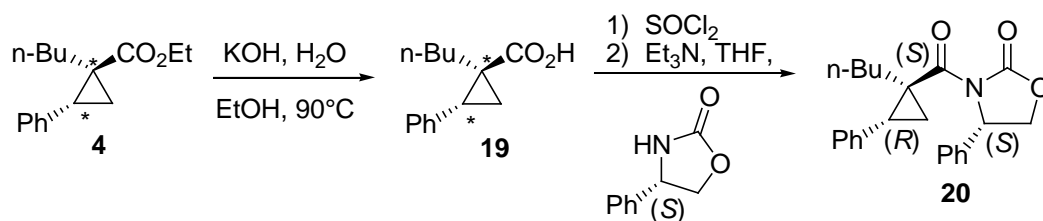

## General procedure for cyclopropanation to provide racemic samples

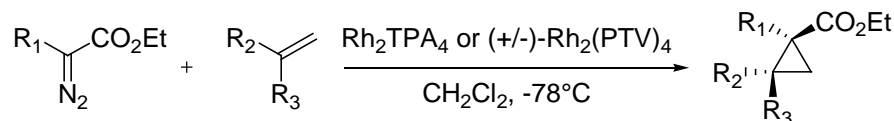

In a dry round bottomed flask,  $\text{Rh}_2\text{TPA}_4$  (3 mg, 0.002 mmol) or  $(\pm)\text{-Rh}_2(\text{PTV})_4$  (2 mg, 0.002 mmol) and 0.40 mmol of alkene were dissolved in anhydrous  $\text{CH}_2\text{Cl}_2$  (2.0 mL) and cooled by a bath of dry ice/acetone ( $-78^\circ\text{C}$ ) under a nitrogen atmosphere. The appropriate diazoester (1.20 mmol) was dissolved in anhydrous  $\text{CH}_2\text{Cl}_2$  (1.2 mL) and added to the reaction mixture via syringe pump at a rate of 1 mL/h. After the addition was complete, the mixture was allowed to warm to room temperature. The solvent was subsequently removed and the residue was chromatographed on silica gel.

NOTE: Compounds **2**, **4**, **7**, and **10** were prepared according to previously described protocols.<sup>5</sup>

### General procedure I for enantioselective cyclopropanation using $\text{Rh}_2(\text{S-PTTL})_4$

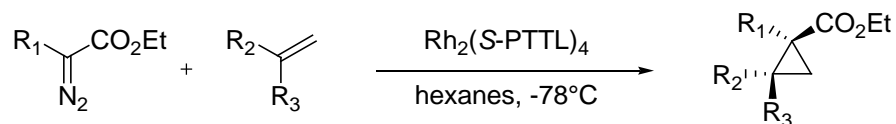

In a dry round bottomed flask,  $\text{Rh}_2(\text{S-PTTL})_4$  (2 mg, 0.002 mmol) and 0.44 mmol of alkene were dissolved in anhydrous hexanes (2.2 mL) and cooled by a bath of dry ice/acetone ( $-78^\circ\text{C}$ ) under a nitrogen atmosphere. The appropriate diazoester (0.40 mmol) was dissolved in anhydrous hexanes (1.0 mL) and added to the reaction mixture via syringe pump at a rate of 1 mL/h. After the addition was complete, the mixture was allowed to warm to room temperature. The solvent was subsequently removed and the residue was chromatographed on silica gel.

### General procedure II for enantioselective cyclopropanation using $\text{Rh}_2(\text{S-PTTL})_4$

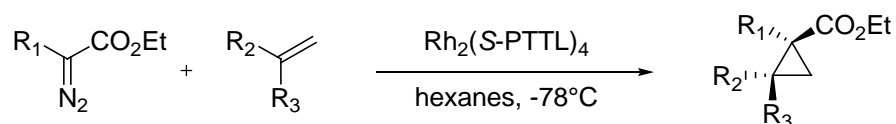

In a dry round bottomed flask,  $\text{Rh}_2(\text{S-PTTL})_4$  (2 mg, 0.002 mmol) and 0.40 mmol of alkene were dissolved in anhydrous hexanes (2.0 mL) and cooled by a bath of dry ice/acetone ( $-78^\circ\text{C}$ ) under a nitrogen atmosphere. The appropriate diazoester (1.20 mmol) was dissolved in anhydrous hexanes (1.2 mL) and added to the reaction mixture via syringe pump at a rate of 1 mL/h. After the addition was complete, the mixture was allowed to warm to room temperature. The solvent was subsequently removed and the residue was chromatographed on silica gel.

**(1*S*,2*R*)-(+)-Ethyl 1-ethyl-2-phenylcyclopropane-1-carboxylate (2)**

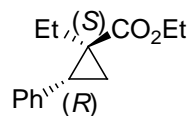

General procedure I was followed with 55 mg (0.39 mmol) of ethyl 2-diazobutanoate and 45 mg (0.43 mmol) of styrene to give 66 mg (0.30 mmol, 77%) of known compound **2** as a colorless oil. The purity was measured to be  $\geq 95\%$  by <sup>1</sup>H NMR and GC. The diastereomer ratio was measured to be 92:8 by GC analysis. The enantiomeric excess of the major diastereomer was measured to be 79% ee by HPLC analysis (CHIRACEL OD column, 0.1% isopropanol in hexanes, 1 mL/min, 220 nm). A similar experiment starting with 57 mg (0.40 mmol) of ethyl 2-diazobutanoate and 46 mg (0.44 mmol) of styrene gave 66 mg (0.30 mmol, 75%) of **2**. The diastereomer ratio was measured to be 92:8 by GC analysis. The enantiomeric excess of the major diastereomer was measured to be 79% ee by HPLC analysis. Alternatively, general procedure II with 40 mg (0.38 mmol) of styrene (99% purity) and 160 mg (1.13 mmol) of ethyl 2-diazobutanoate gave 76 mg (0.35 mmol, 92%) of **2**. A repetition of that experiment gave **2** in 98% yield.  $[\alpha]_{\text{D}}^{20} = +78^{\circ}$  (*c.* 1.04 CHCl<sub>3</sub>); The spectral properties were identical to those previously described in the literature for the racemic material.<sup>5</sup>

**(1*S*,2*R*)-(+)-Ethyl 2-phenyl-1-propylcyclopropane-1-carboxylate (3)**

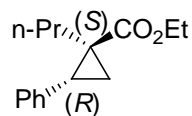

General procedure I was followed with 62 mg (0.40 mmol) of ethyl 2-diazopentanoate and 45 mg (0.44 mmol) of styrene to give 77 mg (0.33 mmol, 83%) of **3** as a colorless oil. The purity was measured to be  $\geq 95\%$  by  $^1\text{H}$  NMR and GC. Two peaks were detected in a 99:1 ratio by GC analysis. The enantiomeric excess was measured to be 94% ee by HPLC analysis (CHIRACEL OD column, 0.2% isopropanol in hexanes, 1 mL/min, 220 nm). A similar experiment starting with 67 mg (0.43 mmol) of ethyl 2-diazopentanoate and 49 mg (0.47 mmol) of styrene gave 85 mg (0.37 mmol, 86%) of **3**. Two peaks were detected in a  $> 99:1$  ratio by GC analysis. The enantiomeric excess was measured to be 94% ee by HPLC analysis. Alternatively, general procedure II with 23 mg (0.22 mmol) of styrene (99% purity) and 104 mg (0.67 mmol) of ethyl 2-diazopentanoate gave 52 mg (0.22 mmol, 100%) of **3**. A repetition of that experiment gave **3** in 100% yield.  $[\alpha]_{\text{D}}^{20} = +83^\circ$  (*c.* 1.95  $\text{CHCl}_3$ );  $^1\text{H}$  NMR (400 MHz,  $\text{CDCl}_3$ ,  $\delta$ ): 7.33-7.27 (m, 2H), 7.26-7.18 (m, 3H), 4.25-4.12 (m, 2H), 2.75 (dd,  $J = 9.0$  Hz, 7.1 Hz, 1H), 1.69 (m, 1H), 1.67-1.58 (m, 1H), 1.43-1.27 (m, 2H), 1.29 (t,  $J = 7.2$  Hz, 3H), 1.19 (dd,  $J = 7.2$  Hz, 4.6 Hz, 1H), 0.83-0.78 (m, 1H), 0.73 (t,  $J = 7.2$  Hz, 3H);  $^{13}\text{C}$  NMR (100 MHz,  $\text{CDCl}_3$ ,  $\delta$ ): 175.0 (u), 137.2 (u), 129.3 (dn), 128.1 (dn), 126.6 (dn), 60.6 (u), 32.1 (dn), 30.7 (u), 30.5 (u), 20.7 (u), 17.9 (u), 14.3 (dn, 2 carbons); IR ( $\text{CHCl}_3$ ,  $\text{cm}^{-1}$ ): 3020, 2962, 1709, 1458, 1382, 1295, 1217, 1158, 757, 699, 669; HRMS-ESI  $m/z$ :  $[\text{M}^+]$ , calcd for  $\text{C}_{15}\text{H}_{20}\text{O}_2$ , 232.1463; found 232.1454.



**(1*S*,2*R*)-(+)-Ethyl 1-butyl-2-phenylcyclopropane-1-carboxylate (4)**

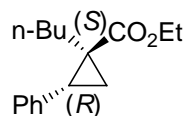

General procedure I was followed with 73 mg (0.43 mmol) of ethyl 2-diazohehexanoate and 49 mg (0.47 mmol) of styrene to give 92 mg (0.37 mmol, 86%) of **4** as a colorless oil. The purity was measured to be  $\geq 95\%$  by  $^1\text{H}$  NMR and GC. Two peaks were detected in a 99:1 ratio by GC analysis. The enantiomeric excess was measured to be 96% ee by HPLC analysis (CHIRACEL OD column, 0.1% isopropanol in hexanes, 1 mL/min, 220 nm). A similar experiment starting with 75 mg (0.44 mmol) of ethyl 2-diazohehexanoate and 51 mg (0.49 mmol) of styrene gave 88 mg (0.36 mmol, 82%) of **4**. Two peaks were detected in a  $> 99:1$  ratio by GC analysis. The enantiomeric excess was measured to be 97% ee by HPLC analysis. Alternatively, general procedure II with 20 mg (0.19 mmol) of styrene (99% purity) and 97 mg (0.57 mmol) of ethyl 2-diazohehexanoate gave 45 mg (0.18 mmol, 95%) of **4**. A repetition of that experiment gave **4** in 92% yield.  $[\alpha]_{\text{D}}^{20} = +67^\circ$  (*c.* 0.93  $\text{CHCl}_3$ ); The spectral properties were identical to those previously described in the literature for the racemic material.<sup>5</sup>

**(1*S*,2*R*)-(+)-Ethyl 1-isopentyl-2-phenylcyclopropane-1-carboxylate (5)**

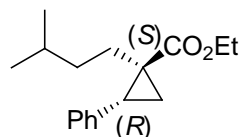

General procedure I was followed with 81 mg (0.44 mmol) of ethyl 2-diazo-5-methylhexanoate and 51 mg (0.49 mmol) of styrene to give 102 mg (0.39 mmol, 89%) of **5** as a colorless oil. The

purity was measured to be  $\geq 95\%$  by  $^1\text{H}$  NMR and GC. Two peaks were detected in a 99:1 ratio by GC analysis. The enantiomeric excess was measured to be 99% ee by HPLC analysis (CHIRACEL OD column, 0.2% isopropanol in hexanes, 1 mL/min, 220 nm). A similar experiment starting with 79 mg (0.43 mmol) of ethyl 2-diazo-5-methylhexanoate and 49 mg (0.47 mmol) of styrene gave 100 mg (0.38 mmol, 88%) of **5**. Two peaks were detected in a  $> 99:1$  ratio by GC analysis. The enantiomeric excess was measured to be 99% ee by HPLC analysis. Alternatively, general procedure II with 36 mg (0.34 mmol) of styrene (99% purity) and 176 mg (1.04 mmol) of ethyl 2-diazo-5-methylhexanoate gave 81 mg (0.31 mmol, 91%) of **5**. A repetition of that experiment gave **5** in 93% yield.  $[\alpha]_{\text{D}}^{20} = +77^\circ$  (c. 1.84  $\text{CHCl}_3$ );  $^1\text{H}$  NMR ( $\text{CDCl}_3$ , 400 MHz,  $\delta$ ): 7.33-7.26 (m, 2H), 7.25-7.17 (m, 3H), 4.23-4.12 (m, 2H), 2.69 (dd,  $J = 9.4$  Hz, 7.4 Hz, 1H), 1.64 (m, 1H), 1.59-1.51 (m, 1H), 1.30-1.22 (m, 1H), 1.28 (t,  $J = 7.3$  Hz, 3H), 1.21-1.15 (m, 3H), 0.96-0.88 (m, 1H), 0.72 (d,  $J = 6.5$  Hz, 3H), 0.69 (d,  $J = 6.5$  Hz, 3H);  $^{13}\text{C}$  NMR ( $\text{CDCl}_3$ , 100 MHz,  $\delta$ ): 174.9 (u), 137.0 (u), 129.2 (dn), 128.0 (dn), 126.6 (dn), 60.6 (u), 36.4 (u), 32.0 (dn), 30.6 (u), 28.1 (dn), 26.2 (u), 22.6 (dn), 22.1 (dn), 18.0 (u), 14.2 (dn); IR ( $\text{CHCl}_3$ ,  $\text{cm}^{-1}$ ): 3020, 2957, 1708, 1499, 1459, 1384, 1216, 1158, 1082, 1026, 757, 699, 669; HRMS-ESI  $m/z$ :  $[\text{M} + \text{Na}]$ , calcd for  $\text{C}_{17}\text{H}_{24}\text{O}_2\text{Na}$ , 283.1674; found 283.1669.

**(1*S*,2*R*)-(+)-Ethyl 1-butyl-2-(4-methoxyphenyl)cyclopropane-1-carboxylate (6)**

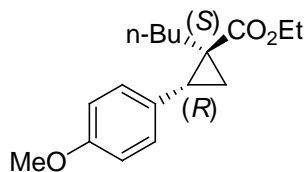

General procedure II was followed with 30 mg (0.22 mmol) of 4-vinylanisole (97% purity) and 75 mg (0.44 mmol) of ethyl 2-diazohexanoate to give 51 mg (0.18 mmol, 82%) of **6** as a colorless oil. The purity was measured to be  $\geq 95\%$  by  $^1\text{H}$  NMR and only 1 peak was detected by GC analysis. The enantiomeric excess was measured to be 90% ee by HPLC analysis of the alcohol adduct obtained upon DIBAL reduction of the ester. A similar experiment starting with 65 mg (0.47 mmol) of 4-vinylanisole (97% purity) and 240 mg (1.41 mmol) of ethyl 2-diazohexanoate gave 104 mg (0.38 mmol, 81%) of **6**. Two peaks were detected in a  $> 99:1$  ratio by GC analysis. The enantiomeric excess was measured to be 91% by HPLC analysis.  $[\alpha]_{\text{D}}^{20} = +78^\circ$  (c. 1.04  $\text{CHCl}_3$ );  $^1\text{H}$  NMR ( $\text{CDCl}_3$ , 400 MHz,  $\delta$ ): 7.09 (d,  $J = 8.2$  Hz, 2H), 6.82 (d,  $J = 8.8$  Hz, 2H), 4.22-4.10 (m, 2H), 3.80 (s, 3H), 2.69 (dd,  $J = 9.3$  Hz, 7.2 Hz, 1H), 1.68-1.55 (m, 2H), 1.34-1.22 (m, 2H), 1.29 (t,  $J = 7.2$  Hz, 3H), 1.19-1.10 (m, 3H), 0.83-0.73 (m, 1H), 0.78 (t,  $J = 7.2$  Hz, 3H);  $^{13}\text{C}$  NMR ( $\text{CDCl}_3$ , 100 MHz,  $\delta$ ): 175.1 (u), 158.3 (u), 130.2 (dn), 129.1 (u), 113.5 (dn), 60.5 (u), 55.2 (dn), 31.5 (dn), 30.4 (u), 29.7 (u), 28.1 (u), 22.8 (u), 18.1 (u), 14.2 (dn), 13.9 (dn); IR ( $\text{CHCl}_3$ ,  $\text{cm}^{-1}$ ): 3011, 2959, 2873, 1706, 1612, 1515, 1463, 1380, 1318, 1292, 1249, 1203, 1174, 1059, 1035, 837, 736, 667; HRMS-ESI  $m/z$ :  $[\text{M} + \text{Na}]$ , calcd for  $\text{C}_{17}\text{H}_{24}\text{O}_3\text{Na}$ , 299.1623; found 299.1618.

**(1*S*,2*R*)-(+)-Ethyl 1-butyl-2-(4-fluorophenyl)cyclopropane-1-carboxylate (7)**

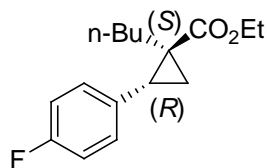

General procedure II was followed with 56 mg (0.45 mmol) of 4-fluorostyrene (97% purity) and 228 mg (1.34 mmol) of ethyl 2-diazohehexanoate to give 118 mg (0.45 mmol, 100%) of known compound **7** as a colorless oil. The purity was measured to be  $\geq 95\%$  by  $^1\text{H}$  NMR and GC. Two peaks were detected in a 99:1 ratio by GC analysis. The enantiomeric excess was measured to be 96% ee by HPLC analysis of the alcohol adduct obtained upon DIBAL reduction of the ester. A similar experiment starting with 49 mg (0.39 mmol) of 4-fluorostyrene (97% purity) and 200 mg (1.18 mmol) of ethyl 2-diazohehexanoate gave 104 mg (0.39 mmol, 100%) of **7**. Two peaks were detected in a  $> 99:1$  ratio by GC analysis. The enantiomeric excess was measured to be 97% ee by HPLC analysis.  $[\alpha]_{\text{D}}^{20} = +82^\circ$  (*c.* 1.28  $\text{CHCl}_3$ ); The spectral properties were identical to those previously described in the literature for the racemic material.<sup>5</sup>

**(1*S*,2*R*)-(+)-Ethyl 1-butyl-2-(*E*)-(β)-styrylcyclopropane-1-carboxylate (8)**

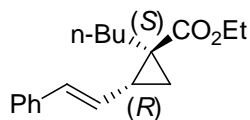

General procedure II was followed with 53 mg (0.41 mmol) of (*E*)-1-phenylbutadiene and 209 mg (1.23 mmol) of ethyl 2-diazoheptanoate to give 77 mg (0.28 mmol, 68%) of **8** as a colorless oil. The purity was measured to be 93% by <sup>1</sup>H NMR. Two peaks were detected in a 96:4 ratio by GC analysis. The enantiomeric excess was measured to be 85% ee by HPLC analysis (CHIRACEL OD column, 0.2% isopropanol in hexanes, 1 mL/min, 220 nm). A similar experiment starting with 55 mg (0.42 mmol) of (*E*)-1-phenylbutadiene and 214 mg (1.26 mmol) of ethyl 2-diazoheptanoate gave 86 mg (0.32 mmol, 76%) of **8**. Two peaks were detected in a 97:3 ratio by GC analysis. The enantiomeric excess was measured to be 85% ee by HPLC analysis.  $[\alpha]_D^{20} = +56^\circ$  (c. 0.84 CHCl<sub>3</sub>); <sup>1</sup>H NMR (CDCl<sub>3</sub>, 400 MHz, δ): 7.36-7.27 (m, 4H), 7.25-7.18 (m, 1H), 6.57 (d, *J* = 16.0 Hz, 1H), 5.98 (dd, *J* = 16.0 Hz, 8.4 Hz, 1H), 4.15 (dq, *J* = 7.1 Hz, 1.1 Hz, 2H), 2.30 (app q, *J* = 8.6 Hz, 1H), 2.73-2.65 (m, 1H), 1.61-1.57 (m, 1H), 1.56-1.50 (m, 1H), 1.49-1.41 (m, 2H), 1.33-1.23 (m, 5H), 0.96-0.87 (m, 4H); <sup>13</sup>C NMR (CDCl<sub>3</sub>, 100 MHz, δ): 174.6 (u), 137.3 (u), 132.3 (dn), 128.6 (dn), 127.9 (dn), 127.2 (dn), 125.9 (dn), 60.6 (u), 30.8 (u), 30.1 (dn), 30.0 (u), 29.0 (u), 22.9 (u), 21.6 (u), 14.2 (dn), 14.0 (dn); IR (CHCl<sub>3</sub>, cm<sup>-1</sup>): 3014, 2959, 2872, 1709, 1450, 1382, 1244, 1207, 1176, 1156, 1044, 961, 758, 747, 694, 667; HRMS-CI(NH<sub>3</sub>) *m/z*: [M+H], calcd for C<sub>18</sub>H<sub>25</sub>O<sub>2</sub>, 273.1855; found 273.1865.

**(1*S*,2*R*)-(-)-Ethyl 2-(naphthalen-1-yl)-1-propylcyclopropane-1-carboxylate (9)**

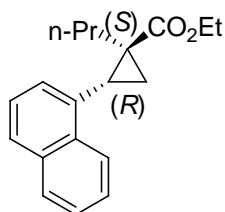

General procedure II was followed with 31 mg (0.19 mmol) of 1-vinylnaphthalene (95% purity) and 89 mg (0.57 mmol) of ethyl 2-diazopentanoate to give 41 mg (0.15 mmol, 79%) of **9** as a pale yellow oil. The purity was measured to be  $\geq 95\%$  by  $^1\text{H}$  NMR and GC. Two peaks were detected in a 98:2 ratio by GC analysis. The enantiomeric excess was measured to be 93% ee by HPLC analysis of the alcohol adduct obtained upon DIBAL reduction of the ester. A similar experiment starting with 70 mg (0.43 mmol) of 1-vinylnaphthalene (95% purity) and 201 mg (1.28 mmol) of ethyl 2-diazopentanoate gave 85 mg (0.30 mmol, 70%) of **9**. Two peaks were detected in a 99:1 ratio by GC analysis. The enantiomeric excess was measured to be 94% ee by HPLC analysis.  $[\alpha]_{\text{D}}^{20} = -113^\circ$  (c. 1.60  $\text{CHCl}_3$ );  $^1\text{H}$  NMR ( $\text{CDCl}_3$ , 400 MHz,  $\delta$ ): 8.04 (d,  $J = 7.9$  Hz, 1H), 7.85 (d,  $J = 7.5$  Hz, 1H), 7.75 (d,  $J = 7.9$  Hz, 1H), 7.56-7.48 (m, 2H), 7.41 (t,  $J = 7.1$ , 1H), 7.30-7.24 (m, 1H), 4.30 (q,  $J = 7.1$  Hz, 2H), 3.01 (dd,  $J = 8.8$  Hz, 7.7 Hz, 1H), 1.90 (m, 1H), 1.75-1.66 (m, 1H), 1.43-1.32 (m, 2H), 1.38 (t,  $J = 7.1$  Hz, 3H), 1.30-1.19 (m, 1H), 0.66 (t,  $J = 7.4$  Hz, 3H), 0.47-0.38 (m, 1H);  $^{13}\text{C}$  NMR ( $\text{CDCl}_3$ , 100 MHz,  $\delta$ ): 175.1 (u), 134.1 (u), 133.5 (u, 2 carbons), 128.4 (dn), 127.5 (dn), 126.2 (dn), 126.1 (dn), 125.8 (dn), 125.2 (dn), 124.2 (dn), 60.7 (u), 30.6 (u), 30.4 (u), 30.4 (dn), 20.9 (u), 17.6 (u), 14.4 (dn), 14.1 (dn); IR ( $\text{CHCl}_3$ ,  $\text{cm}^{-1}$ ): 3011, 2963, 2873, 1708, 1463, 1374, 1294, 1226, 1177, 1138, 1054, 802, 749; HRMS-ESI  $m/z$ :  $[\text{M} + \text{Na}]$ , calcd for  $\text{C}_{19}\text{H}_{22}\text{O}_2\text{Na}$ , 305.1518; found 305.1514.

**(1*S*,2*R*)-(+)-Ethyl 1-butyl-2-methyl-2-phenylcyclopropane-1-carboxylate (10)**

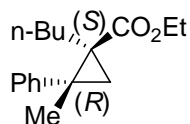

General procedure II was followed with 20 mg (0.17 mmol) of  $\alpha$ -methylstyrene (99% purity) and 87 mg (0.51 mmol) of ethyl 2-diazohexanoate to give 39 mg (0.15 mmol, 88%) of known compound **10** as a colorless oil. The purity was measured to be  $\geq 95\%$  by <sup>1</sup>H NMR and GC. Two peaks were detected in a 99:1 ratio by GC analysis. The enantiomeric excess was measured to be 97% ee by HPLC analysis (CHIRACEL OD column, 0.1% isopropanol in hexanes, 1 mL/min, 220 nm). A similar experiment starting with 51 mg (0.43 mmol) of  $\alpha$ -methylstyrene (99% purity) and 217 mg (1.28 mmol) of ethyl 2-diazohexanoate gave 80 mg (0.41 mmol, 95%) of **10**. Two peaks were detected in a  $> 99:1$  ratio by GC analysis. The enantiomeric excess was measured to be 96% ee by HPLC analysis.  $[\alpha]_D^{20} = +50^\circ$  (*c.* 0.56 CHCl<sub>3</sub>); The spectral properties were identical to those previously described in the literature for the racemic material.<sup>5</sup>

**(S)-(-)-Ethyl 1-butyl-2,2-diphenylcyclopropane-1-carboxylate (11)**

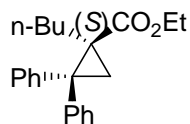

General procedure II was followed with 33 mg (0.18 mmol) of 1,1-diphenylethylene (97% purity) and 61 mg (0.36 mmol) of ethyl 2-diazohexanoate to give 53 mg (0.16 mmol, 89%) of **11** as a colorless oil. The purity was measured to be  $\geq 95\%$  by <sup>1</sup>H NMR. The enantiomeric excess was measured to be 63% ee by HPLC analysis of the alcohol adduct obtained upon DIBAL reduction of the ester. A similar experiment starting with 80 mg (0.43 mmol) of 1,1-diphenylethylene (97% purity) and 219 mg (1.29 mmol) of ethyl 2-diazohexanoate gave 138 mg (0.43 mmol, 100%) of **11**. The enantiomeric excess was measured to be 63% ee by HPLC analysis.  $[\alpha]_D^{20} = -5.2^\circ$  (c. 0.90 CHCl<sub>3</sub>); <sup>1</sup>H NMR (CDCl<sub>3</sub>, 400 MHz,  $\delta$ ): 7.39-7.33 (m, 4H), 7.22-7.19 (m, 2H), 7.17-7.10 (m, 3H), 7.08-7.01 (m, 1H), 3.83-3.75 (m, 1H), 3.72-3.65 (m, 1H), 2.38-2.28 (m, 1H), 2.24 (dd,  $J = 5.0$  Hz, 1.5 Hz, 1H), 1.35 (d,  $J = 5.0$  Hz, 1H), 1.34-1.11 (m, 4H), 0.82 (t,  $J = 7.2$  Hz, 3H), 0.75 (t,  $J = 7.2$  Hz, 3H), 0.45 (m, 1H); <sup>13</sup>C NMR (CDCl<sub>3</sub>, 100 MHz,  $\delta$ ): 172.5 (u), 143.2 (u), 142.3 (u), 129.4 (dn), 128.9 (dn), 128.5 (dn), 128.2 (dn), 126.6 (dn), 126.4 (dn), 60.3 (u), 43.9 (u), 36.7 (u), 32.7 (u), 30.1 (u), 22.7 (u), 22.2 (u), 14.1 (dn), 13.7 (dn); IR (CHCl<sub>3</sub>, cm<sup>-1</sup>): 3029, 2958, 2930, 2872, 1710, 1494, 1449, 1373, 1263, 1087, 1025, 760, 748, 707; HRMS-ESI m/z: [M + Na], calcd for C<sub>22</sub>H<sub>26</sub>O<sub>2</sub>Na, 345.1831; found 345.1829.



**(1*R*,5*S*,6*S*)-(+)-3,4-Benzo-6-ethoxycarbonyl-6-isopentyl-2-oxabicyclo[3.1.0]hex-3-ene (12)**

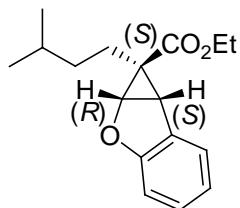

General procedure II was followed with 49 mg (0.41 mmol) of benzofuran and 228 mg (1.24 mmol) of ethyl 2-diazo-5-methylhexanoate to give 106 mg (0.39 mmol, 95%) of **12** as a colorless oil. The purity was measured to be  $\geq 95\%$  by  $^1\text{H}$  NMR and GC. The diastereomer ratio was measured to be  $\geq 95:5$  by  $^1\text{H}$  NMR, and only one peak was detected by GC analysis. The enantiomeric excess was measured to be 99% ee by HPLC analysis (CHIRACEL OD column, 0.1% isopropanol in hexanes, 1 mL/min, 220 nm). An identical experiment gave 106 mg (0.39 mmol, 95%) of **12**. The diastereomer ratio was measured to be  $\geq 95:5$  by  $^1\text{H}$  NMR, and only one peak was detected by GC analysis. The enantiomeric excess was measured to be 99% ee by HPLC analysis.  $[\alpha]_{\text{D}}^{20} = +240^\circ$  (c. 0.84  $\text{CHCl}_3$ );  $^1\text{H}$  NMR ( $\text{CDCl}_3$ , 400 MHz,  $\delta$ ): 7.35 (dd,  $J = 7.4$  Hz, 1.4 Hz, 1H), 7.18 (app dt,  $J = 7.7$  Hz, 1.5 Hz, 1H), 6.93 (app dt,  $J = 7.6$  Hz, 1.3 Hz, 1H), 6.86 (d,  $J = 8.0$  Hz, 1H), 4.98 (d,  $J = 5.7$  Hz, 1H), 4.19 (q,  $J = 7.1$  Hz, 2H), 3.33 (d,  $J = 5.7$  Hz, 1H), 1.39-1.27 (m, 1H), 1.29 (t,  $J = 7.2$  Hz, 3H), 1.26-1.18 (m, 2H), 1.04-0.93 (m, 2H), 0.68 (d,  $J = 6.8$  Hz, 3H), 0.55 (d,  $J = 6.6$  Hz, 3H);  $^{13}\text{C}$  NMR ( $\text{CDCl}_3$ , 100 MHz,  $\delta$ ): 173.6 (u), 161.4 (u), 128.1 (dn), 126.1 (u), 125.6 (dn), 121.2 (dn), 109.3 (dn), 70.9 (dn), 61.0 (u), 35.8 (u), 34.8 (dn), 28.0 (dn), 26.0 (u), 22.4 (dn), 21.9 (dn), 18.8 (u), 14.3 (dn); IR ( $\text{CHCl}_3$ ,  $\text{cm}^{-1}$ ): 2958, 2871, 1703, 1616, 1596, 1464, 1370, 1311, 1239, 1204, 1159, 1090, 1058, 1033, 758, 747; HRMS- $\text{CI}(\text{NH}_3)$  m/z:  $[\text{M}^+]$ , calcd for  $\text{C}_{17}\text{H}_{22}\text{O}_3$ , 274.1569; found 274.1564.

**(1*S*,2*R*)-(+)-Ethyl 1-hexyl-2-phenylcyclopropane-1-carboxylate (13)**

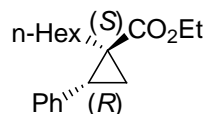

In a dry round bottomed flask,  $\text{Rh}_2(\text{S-PTTL})_4$  (2 mg, 0.001 mmol) and 85 mg (0.81 mmol) of styrene (99% purity) were dissolved in anhydrous hexanes (2.5 mL) and cooled by a bath of dry ice/acetone ( $-78^\circ\text{C}$ ) under a nitrogen atmosphere. Ethyl 2-diazoctanoate (54 mg, 0.27 mmol) was dissolved in hexanes (1.5 mL) and added to the reaction mixture via syringe pump at a rate of 1 mL/h. After the addition was complete, mesitylene (47 mg, 0.39 mmol) was added to the reaction mixture, and an  $^1\text{H}$  NMR spectrum was taken to estimate the yield. The solvent was subsequently removed and the residue was chromatographed on silica gel to give 55 mg (0.20 mmol, 74%) of **13** as a colorless oil. The purity was measured to be  $\geq 95\%$  by  $^1\text{H}$  NMR and only one peak was detected by GC analysis. The enantiomeric excess was measured to be 96% ee by HPLC analysis (CHIRACEL OD column, 0.2% isopropanol in hexanes, 1 mL/min, 220 nm). A similar experiment starting with 82 mg (0.78 mmol) of styrene (99% purity) and 51 mg (0.26 mmol) of ethyl 2-diazoctanoate gave 49 mg (0.18 mmol, 69%) of **13**. Only one peak was detected by GC analysis. The enantiomeric excess was measured to be 95% ee by HPLC analysis.  $[\alpha]_D^{20} = +82^\circ$  (*c.* 0.93  $\text{CHCl}_3$ );  $^1\text{H}$  NMR ( $\text{CDCl}_3$ , 400 MHz,  $\delta$ ): 7.32-7.26 (m, 2H), 7.24-7.17 (m, 3H), 4.25-4.13 (m, 2H), 2.77 (dd,  $J = 8.9$  Hz, 6.8 Hz, 1H), 1.67 (dq,  $J = 4.8$  Hz, 1.3 Hz, 1H), 1.63-1.53 (m, 1H), 1.33-1.26 (m, 2H), 1.30 (t,  $J = 7.1$  Hz, 3H), 1.20-1.06 (m, 7H), 0.89-0.79 (m, 1H), 0.81 (t,  $J = 7.2$  Hz, 3H);  $^{13}\text{C}$  NMR ( $\text{CDCl}_3$ , 100 MHz,  $\delta$ ): 175.0 (u), 137.3 (u), 129.2 (dn), 128.1 (dn), 126.6 (dn), 60.6 (u), 32.0 (dn), 31.6 (u), 30.5 (u), 29.4 (u), 28.5 (u), 27.4 (u), 22.5 (u), 17.9 (u), 14.2 (dn), 14.0 (dn); IR ( $\text{CHCl}_3$ ,  $\text{cm}^{-1}$ ): 2930, 1720, 1459, 1219, 1185, 1153, 772, 698; HRMS-ESI  $m/z$ :  $[\text{M} + \text{Na}]$ , calcd for  $\text{C}_{18}\text{H}_{26}\text{O}_2\text{Na}$ , 297.1831; found 297.1825.

## General procedure for ester reduction

To a dry round bottomed flask was added 0.10 mmol of the cyclopropane carboxylic ester in 0.7 mL anhydrous THF. The mixture was cooled by a bath of dry ice/acetone ( $-78\text{ }^{\circ}\text{C}$ ), and 0.39 mL (0.39 mmol) of a 1.0 M solution of diisobutylaluminium hydride in THF was added dropwise. The reaction mixture was then warmed to room temperature and allowed to stir for 1 hour. The flask was then cooled by a bath of ice water ( $0\text{ }^{\circ}\text{C}$ ) and 161 mg (0.50 mmol)  $\text{Na}_2\text{SO}_4 \cdot 10\text{H}_2\text{O}$  was added and the mixture was allowed to warm to room temperature and stir for 30 minutes. The mixture was then filtered, concentrated, and chromatographed on silica gel.

### (1*S*,2*R*)-(+)-1-Butyl-2-(4-methoxyphenyl)cyclopropylmethanol (**15**)

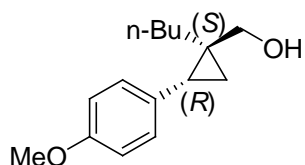

The general procedure was followed starting with 18 mg (0.065 mmol) of **9** and 0.26 mL (0.26 mmol) of a 1.0 M diisobutylaluminium hydride solution to give 11 mg (0.047 mmol, 72%) of **15** as a colorless oil. The purity was measured to be  $> 95\%$  by  $^1\text{H}$  NMR. The enantiomeric excess was measured to be 90% ee by HPLC analysis (CHIRACEL OD column, 2% isopropanol in hexanes, 1 mL/min, 220 nm). A similar experiment starting with 29 mg (0.11 mmol) of **9** and 0.43 mL (0.43 mmol) of diisobutylaluminium hydride solution gave 19 mg (0.081 mmol, 74%) of **15**. The enantiomeric excess was measured to be 91% ee by HPLC analysis.  $[\alpha]_{\text{D}}^{20} = +21^{\circ}$  (c. 0.50  $\text{CHCl}_3$ );  $^1\text{H}$  NMR (400 MHz,  $\text{CDCl}_3$ ,  $\delta$ ): 7.09 (d,  $J = 8.5$  Hz, 2H), 6.81 (d,  $J = 8.5$  Hz, 2H), 3.79 (s, 3H), 3.68 (d,  $J = 10.2$  Hz, 1H), 3.42 (d,  $J = 10.2$  Hz, 1H), 2.01 (dd,  $J = 8.5$  Hz, 5.9

Hz, 1H), 1.55 (bs, 1H), 1.32-1.22 (m, 3H), 1.20-1.06 (m, 2H), 0.96-0.88 (m, 1H), 0.87-0.80 (m, 2H), 0.77 (t,  $J = 7.1$  Hz, 3H);  $^{13}\text{C}$  NMR (100 MHz,  $\text{CDCl}_3$ ,  $\delta$ ): 157.8 (u), 130.7 (u), 130.0 (dn), 113.4 (dn), 69.1 (u), 55.2 (dn), 29.2 (u), 28.7 (u), 28.6 (u), 26.7 (dn), 22.9 (u), 14.2 (u), 14.0 (dn); IR ( $\text{CHCl}_3$ ,  $\text{cm}^{-1}$ ): 3613, 3457 (br), 3017, 2959, 2933, 2873, 1612, 1514, 1465, 1247, 1215, 1178, 1037, 909, 836, 757, 745, 735, 669; HRMS-CI( $\text{NH}_3$ )  $m/z$ : [ $\text{M}^+$ ], calcd for  $\text{C}_{15}\text{H}_{22}\text{O}_2$ , 234.1620; found 234.1611.

**(1*S*,2*R*)-(-)-1-Butyl-2-(4-fluorophenyl)cyclopropylmethanol (16)**

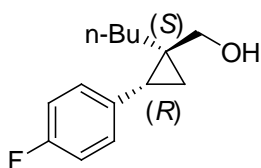

The general procedure for ester reduction was followed starting with 34 mg (0.13 mmol) of **10** and 0.52 mL (0.52 mmol) of a 1.0 M diisobutylaluminium hydride solution to give 14 mg (0.063 mmol, 48%) of **16** as a colorless oil. The purity was measured to be > 95% by  $^1\text{H}$  NMR. The enantiomeric excess was measured to be 98% ee by HPLC analysis (CHIRACEL OD column, 2% isopropanol in hexanes, 1 mL/min, 220 nm). A similar experiment starting with 44 mg (0.17 mmol) of **10** and 0.67 mL (0.67 mmol) of diisobutylaluminium hydride solution gave 19 mg (0.086 mmol, 51%) of **16**. The enantiomeric excess was measured to be 97% ee by HPLC analysis.  $[\alpha]_{\text{D}}^{20} = -11^\circ$  (c. 0.88  $\text{CHCl}_3$ );  $^1\text{H}$  NMR (400 MHz,  $\text{CDCl}_3$ ,  $\delta$ ): 7.12 (dd,  $J = 8.7$  Hz, 5.4 Hz, 2H), 6.93 (app t,  $J = 8.7$  Hz, 2H), 3.67 (d,  $J = 11.3$  Hz, 1H), 3.42 (d,  $J = 11.3$  Hz, 1H), 2.02 (dd,  $J = 8.8$  Hz, 7.0 Hz, 1H), 1.62 (bs, 1H), 1.33-1.20 (m, 3H), 1.20-1.02 (m, 2H), 0.98-0.89 (m, 2H), 0.88-0.83 (m, 1H), 0.75 (t,  $J = 7.2$  Hz, 3H);  $^{13}\text{C}$  NMR (100 MHz,  $\text{CDCl}_3$ ,  $\delta$ ): 161.3 (u)

[d,  $^1J(\text{CF}) = 243 \text{ Hz}$ ], 134.3 (u) [d,  $^4J(\text{CF}) = 3 \text{ Hz}$ ], 130.4 (dn) [d,  $^3J(\text{CF}) = 8 \text{ Hz}$ ], 114.7 (dn) [d,  $^2J(\text{CF}) = 21 \text{ Hz}$ ], 68.8 (u), 29.3 (u), 28.6 (u, 2 carbons), 26.6 (dn), 22.9 (u), 14.4 (u), 13.9 (dn); IR ( $\text{CHCl}_3$ ,  $\text{cm}^{-1}$ ): 3452 (br), 3016, 2959, 2933, 2873, 1604, 1511, 1466, 1380, 1213, 1158, 1043, 1016, 840, 778, 767, 744, 669; HRMS- $\text{Cl}(\text{NH}_3)$  m/z:  $[\text{M} - \text{CH}_2\text{OH}]$ , calcd for  $\text{C}_{13}\text{H}_{16}\text{F}$ , 191.1236; found 191.1238.

**(1*S*,2*R*)-(-)-2-(Naphthalen-1-yl)-1-propylcyclopropylmethanol (**17**)**

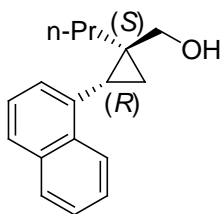

The general procedure was followed starting with 19 mg (0.071 mmol) of **12** and 0.27 mL (0.27 mmol) of a 1.0 M diisobutylaluminium hydride solution to give 12 mg (0.050 mmol, 75%) of **17** as a colorless oil. The purity was measured to be > 95% by  $^1\text{H}$  NMR. The enantiomeric excess was measured to be 92% ee by HPLC analysis (CHIRACEL OD column, 2% isopropanol in hexanes, 1 mL/min, 220 nm). A similar experiment starting with 26 mg (0.092 mmol) of **12** and 0.37 mL (0.37 mmol) of diisobutylaluminium hydride solution gave 18 mg (0.075 mmol, 82%) of **17**. The enantiomeric excess was measured to be 93% ee by HPLC analysis.  $[\alpha]_{\text{D}}^{20} = -180^\circ$  (c. 0.55  $\text{CHCl}_3$ );  $^1\text{H}$  NMR (400 MHz,  $\text{CDCl}_3$ ,  $\delta$ ): 8.43 (d,  $J = 8.0 \text{ Hz}$ , 1H), 7.87 (d,  $J = 8.2 \text{ Hz}$ , 1H), 7.72 (d,  $J = 8.2 \text{ Hz}$ , 1H), 7.55-7.48 (m, 2H), 7.41-7.38 (m, 1H), 7.28-7.26 (m, 1H), 4.05 (d,  $J = 11.1 \text{ Hz}$ , 1H), 3.59 (d,  $J = 11.1 \text{ Hz}$ , 1H), 2.47 (dd,  $J = 8.5 \text{ Hz}$ , 6.7 Hz, 1H), 1.61 (bs, 1H), 1.41-1.19 (m, 3H), 1.10-1.00 (m, 2H), 0.66 (t,  $J = 7.3 \text{ Hz}$ , 3H), 0.61-0.52 (m, 1H);  $^{13}\text{C}$  NMR

(100 MHz, CDCl<sub>3</sub>, δ): 135.6 (u), 134.0 (u), 133.5 (u), 128.3 (dn), 126.8 (dn), 126.1 (dn), 125.8 (dn), 125.6 (dn), 125.3 (dn), 124.8 (dn), 69.0 (u), 31.1 (u), 28.9 (u), 25.8 (dn), 19.9 (u), 14.3 (dn), 13.6 (u); IR (CHCl<sub>3</sub>, cm<sup>-1</sup>): 3363 (br), 3020, 2961, 1510, 1422, 1215, 1045, 929, 757, 669, 627; HRMS-Cl(NH<sub>3</sub>) m/z: [M<sup>+</sup>], calcd for C<sub>17</sub>H<sub>20</sub>O, 240.1514; found 240.1518.

**(S)-(+)-(1-Butyl-2,2-diphenylcyclopropyl)methanol (18)**

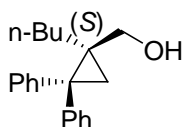

The general procedure for ester reduction was followed starting with 45 mg (0.14 mmol) of **14** and 0.56 mL (0.56 mmol) of a 1.0 M diisobutylaluminium hydride solution to give 28 mg (0.10 mmol, 71%) of **18** as a colorless oil. The purity was measured to be > 95% by <sup>1</sup>H NMR. The enantiomeric excess was measured to be 63% ee by HPLC analysis (CHIRACEL OD column, 2% isopropanol in hexanes, 1 mL/min, 220 nm). A similar experiment starting with 31 mg (0.10 mmol) of **14** and 0.39 mL (0.39 mmol) of diisobutylaluminium hydride solution gave 22 mg (0.079 mmol, 79%) of **18**. The enantiomeric excess was measured to be 63% ee by HPLC analysis.  $[\alpha]_D^{20} = +19^\circ$  (c. 0.90 CHCl<sub>3</sub>); <sup>1</sup>H NMR (400 MHz, CDCl<sub>3</sub>, δ): 7.51 (dd, *J* = 8.5 Hz, 1.7 Hz, 2H), 7.42 (dd, *J* = 8.6 Hz, 1.5 Hz, 2H), 7.28-7.21 (m, 4H), 7.17-7.10 (m, 2H), 3.69 (d, *J* = 11.7 Hz, 1H), 3.19 (d, *J* = 11.7 Hz, 1H), 1.87-1.78 (m, 1H), 1.59-1.47 (m, 1H), 1.53-1.29 (m, 3H), 1.26-1.17 (m, 3H), 0.91-0.87 (m, 1H), 0.83 (t, *J* = 7.2 Hz, 3H); <sup>13</sup>C NMR (100 MHz, CDCl<sub>3</sub>, δ): 143.7 (u), 143.3 (u), 129.9 (dn), 129.5 (dn), 128.6 (dn), 128.3 (dn), 126.3 (dn), 126.1 (dn), 64.5 (u), 42.6 (u), 32.8 (u), 31.4 (u), 28.9 (u), 23.0 (u), 20.1 (u), 14.1 (dn); IR (CHCl<sub>3</sub>, cm<sup>-1</sup>

<sup>1</sup>): 3439 (br), 3023, 2958, 2932, 2860, 1493, 1461, 1379, 1033, 909, 773, 760, 709, 670; HRMS-  
CI(NH<sub>3</sub>) m/z: [M – CH<sub>2</sub>OH], calcd for C<sub>19</sub>H<sub>21</sub>, 249.1643; found 249.1641.

**(1*S*,2*R*)-1-Butyl-2-phenylcyclopropanecarboxylic acid (19)**

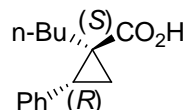

To a round bottom flask was added 43 mg (0.18 mmol) of **7** (96% ee) followed by 2 mL of 3:1 2.0 M KOH : EtOH. The mixture was heated to 90 °C for 16 hours. The mixture was then acidified with 3 M HCl, extracted with three 5 mL portions of CH<sub>2</sub>Cl<sub>2</sub>. The organic extracts were combined, dried (Na<sub>2</sub>SO<sub>4</sub>) and concentrated to give 39 mg (0.18 mmol, 100%) of **19** as a colorless oil. The purity of the crude material was measured to be 97% by <sup>1</sup>H NMR. It was used in the next step without further purification. <sup>1</sup>H NMR (400 MHz, CDCl<sub>3</sub>, δ): 11.0 (bs, 1H), 7.25-7.20 (m, 2H), 7.20-7.10 (m, 3H), 2.80 (dd, *J* = 9.2 Hz, 7.5 Hz, 1H), 1.68 (dq, *J* = 4.9 Hz, 1.0 Hz, 1H), 1.56-1.48 (m, 1H), 1.36-1.13 (m, 3H), 1.10-0.98 (m, 2H), 0.79-0.62 (m, 4H); <sup>13</sup>C NMR (100 MHz, CDCl<sub>3</sub>, δ): 182.1 (u), 136.6 (u), 129.2 (dn), 128.2 (dn), 126.8 (dn), 33.2 (dn), 30.3 (u), 29.5 (u), 27.8 (u), 22.8 (u), 18.6 (u), 13.9 (dn).

**(1*S*,2*R*,3*S*)-(-)-1-Butyl-2-phenylcyclopropanecarbonyl-4-phenyloxazolidin-2-one (20)**

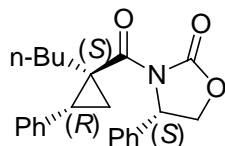

To a dry round bottom flask was added 39 mg (0.18 mmol) **19** in 0.5 mL SOCl<sub>2</sub>. The mixture was stirred at room temperature for 1 hour, and the excess SOCl<sub>2</sub> was subsequently removed *in vacuo*. Anhydrous THF (1.0 mL) was then added, followed by 44 mg (0.27 mmol) of (*S*)-(+)-4-phenyl 2-oxazolidinone and 63 μL Et<sub>3</sub>N. The mixture was allowed to stir for 18 hours at room temperature. A white precipitate formed. The mixture was then added to 10 mL H<sub>2</sub>O, and extracted with CH<sub>2</sub>Cl<sub>2</sub> three times. The organic extracts were combined, dried (MgSO<sub>4</sub>), concentrated and chromatographed on silica gel to give 44 mg (0.12 mmol, 67%) of **20** as a white solid, m.p. 90-91 °C. Small peaks attributable to impurities were observed at 5.57 ppm, 5.19 ppm, 4.80 ppm, 4.39 ppm, 2.61 ppm, 2.20 ppm, 1.12 ppm, and 0.44 ppm. X-ray quality crystals were grown from 1:1 Et<sub>2</sub>O:hexanes.  $[\alpha]_D^{20} = -56^\circ$  (*c.* 0.50 CHCl<sub>3</sub>); <sup>1</sup>H NMR (400 MHz, CDCl<sub>3</sub>, δ): 7.30-7.09 (m, 10H), 5.38 (dd, *J* = 8.9 Hz, 6.1 Hz, 1H), 4.61 (app t, *J* = 8.9 Hz, 1H), 4.22 (dd, *J* = 8.9 Hz, 6.3 Hz, 1H), 2.37 (dd, *J* = 9.4 Hz, 7.1 Hz, 1H), 1.83-1.74 (m, 1H), 1.65-1.57 (m, 1H), 1.02-0.88 (m, 5H), 0.81-0.70 (m, 1H), 0.55 (t, *J* = 7.1 Hz, 3H); <sup>13</sup>C NMR (100 MHz, CDCl<sub>3</sub>, δ): 174.3 (u), 152.7 (u), 138.3 (u), 136.5 (u), 129.9 (dn), 129.1 (dn), 128.9 (dn), 127.9 (dn), 126.9 (dn), 126.6 (dn), 69.8 (u), 58.6 (dn), 34.9 (u), 30.5 (dn), 30.0 (u), 28.8 (u), 22.6 (u), 14.9 (u), 13.9 (dn); IR (CHCl<sub>3</sub>, cm<sup>-1</sup>): 3023, 2928, 1787, 1688, 1460, 1383, 1324, 1225, 1201, 1047, 791, 700, 671; HRMS-ESI *m/z*: [M + Na], calcd for C<sub>23</sub>H<sub>25</sub>NO<sub>3</sub>Na, 386.1732; found 386.1725.



GC trace of **2** (Hewlett Packard HP1 column, 200 °C injection, 50–300 °C over 27 min)

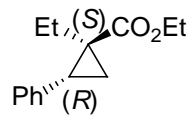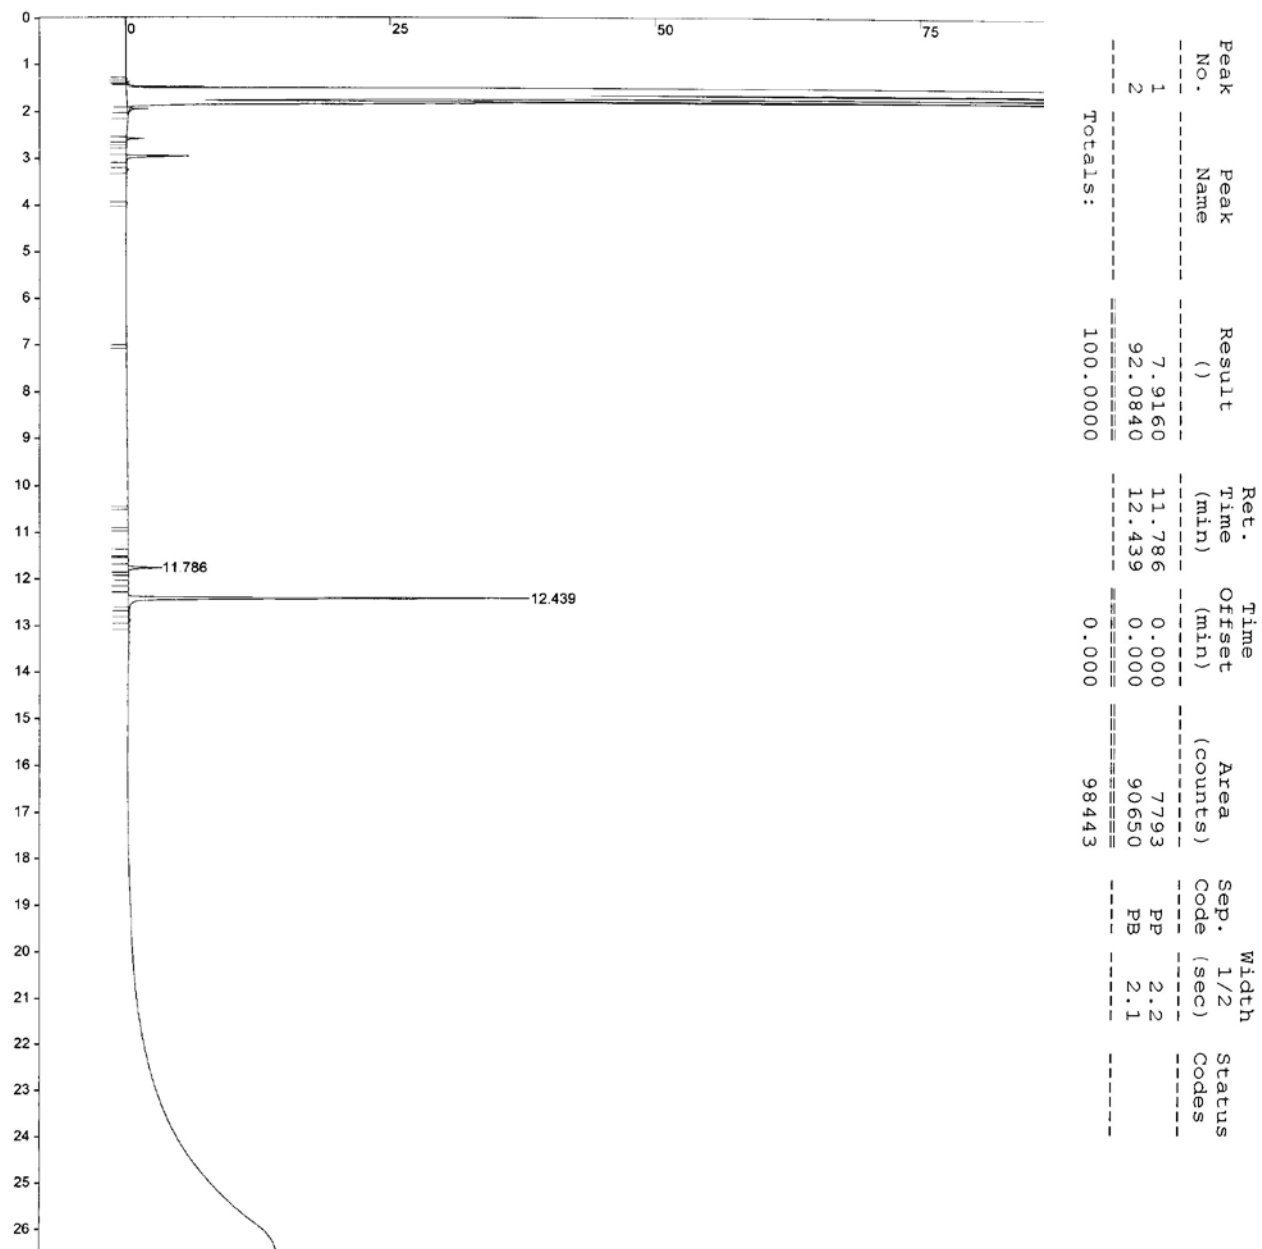

HPLC resolution of racemic **2** (Chiracel OD column, 99.9:0.1 hexanes:isopropanol, 1 mL/min, 220 nm)

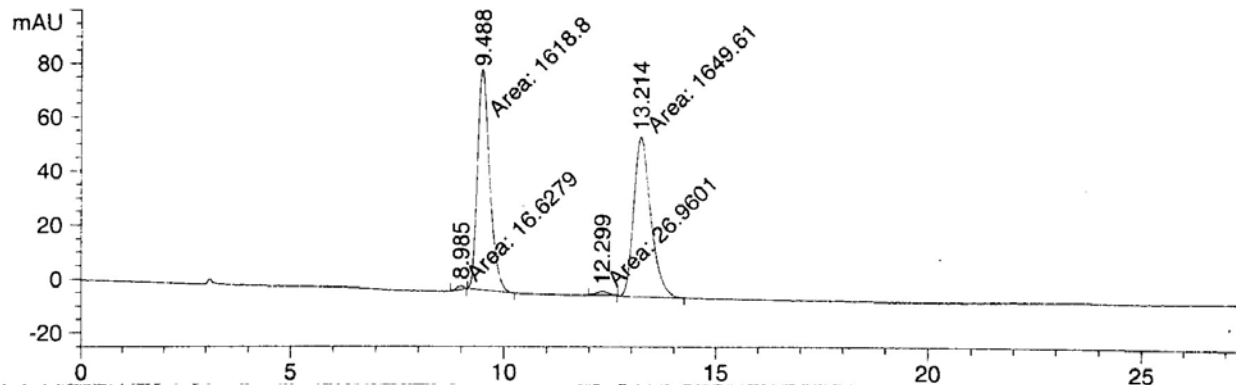

Enantiomeric excess of **2** (Chiracel OD column, 99.9:0.1 hexanes:isopropanol, 1 mL/min, 220 nm)

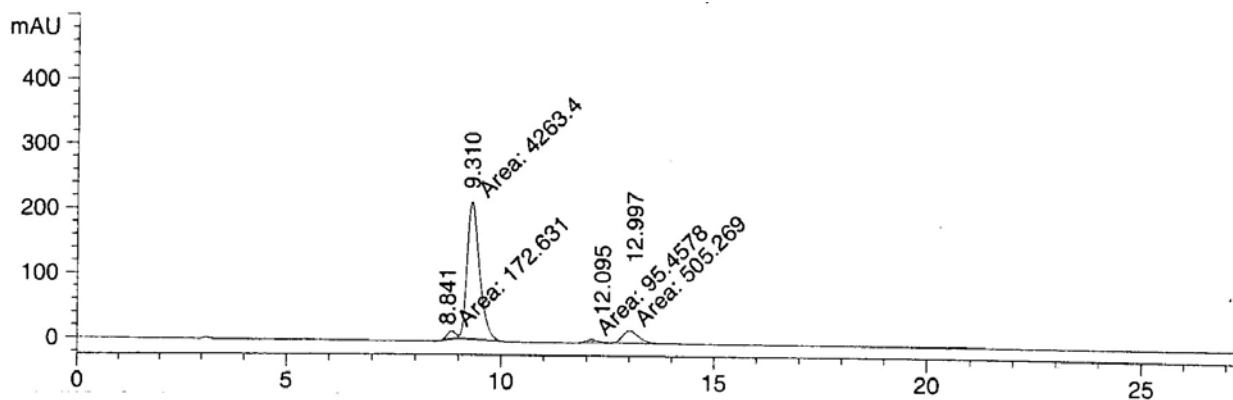

| Peak # | RetTime [min] | Type | Width [min] | Area [mAU*s] | Height [mAU] | Area %  |
|--------|---------------|------|-------------|--------------|--------------|---------|
| 1      | 8.841         | MM   | 0.2245      | 172.63121    | 12.81829     | 3.4274  |
| 2      | 9.310         | MM   | 0.3363      | 4263.39990   | 211.31097    | 84.6457 |
| 3      | 12.095        | MM   | 0.3612      | 95.45778     | 4.40508      | 1.8952  |
| 4      | 12.997        | MM   | 0.4376      | 505.26917    | 19.24272     | 10.0316 |

Totals : 5036.75806 247.77707

$^1\text{H}$  NMR spectrum of **3** (400 MHz,  $\text{CDCl}_3$ )

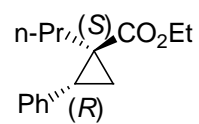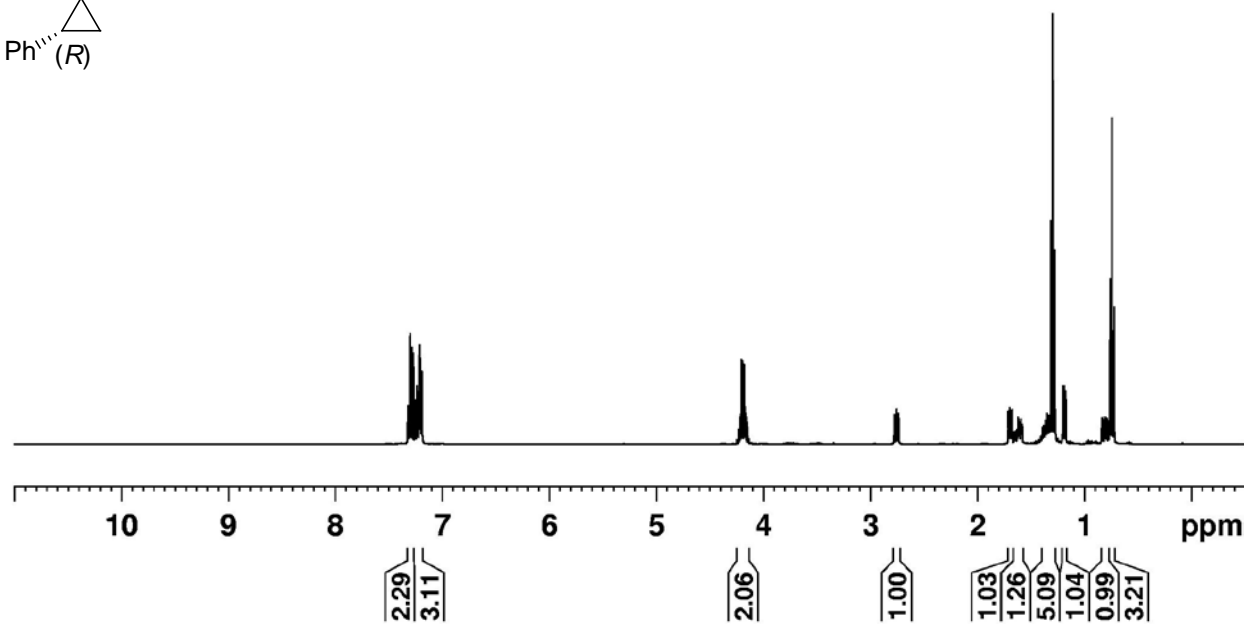

$^{13}\text{C}$  NMR spectrum of **3** (100 MHz,  $\text{CDCl}_3$ )

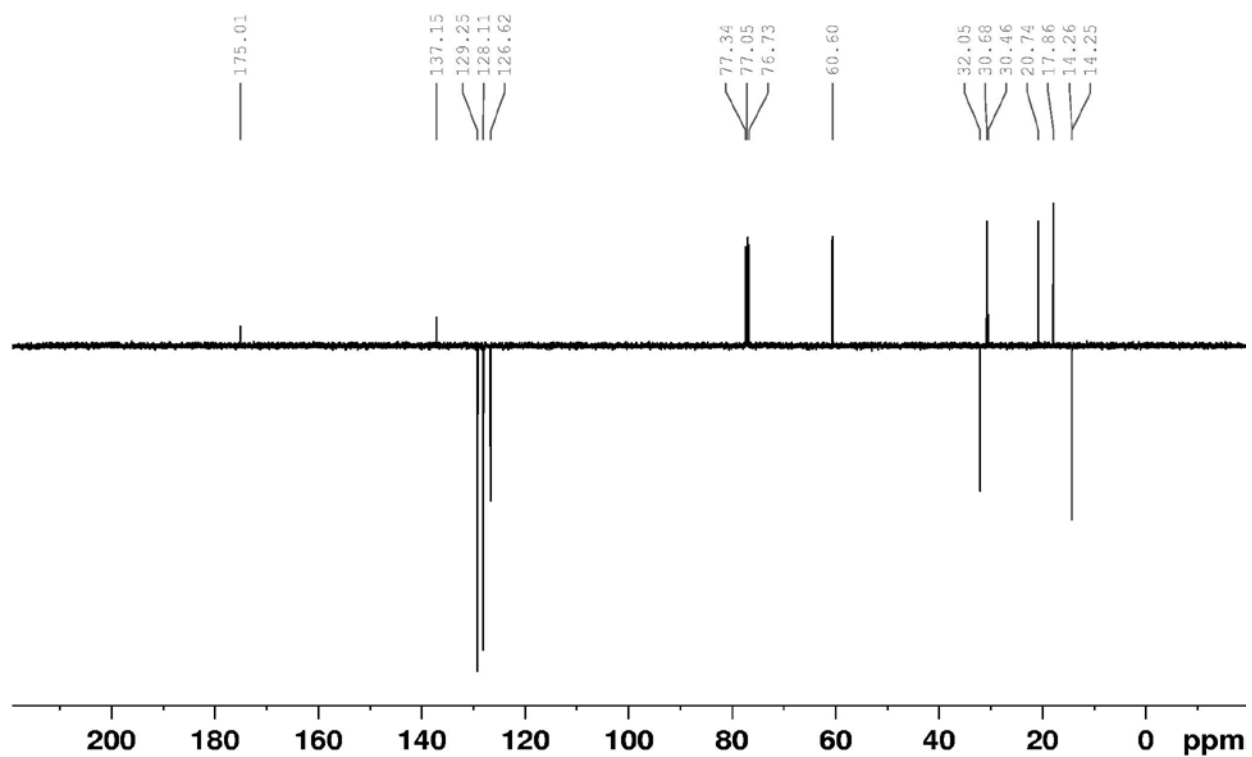

GC trace of 3 (Hewlett Packard HP1 column, 200 °C injection, 50–300 °C over 27 min)

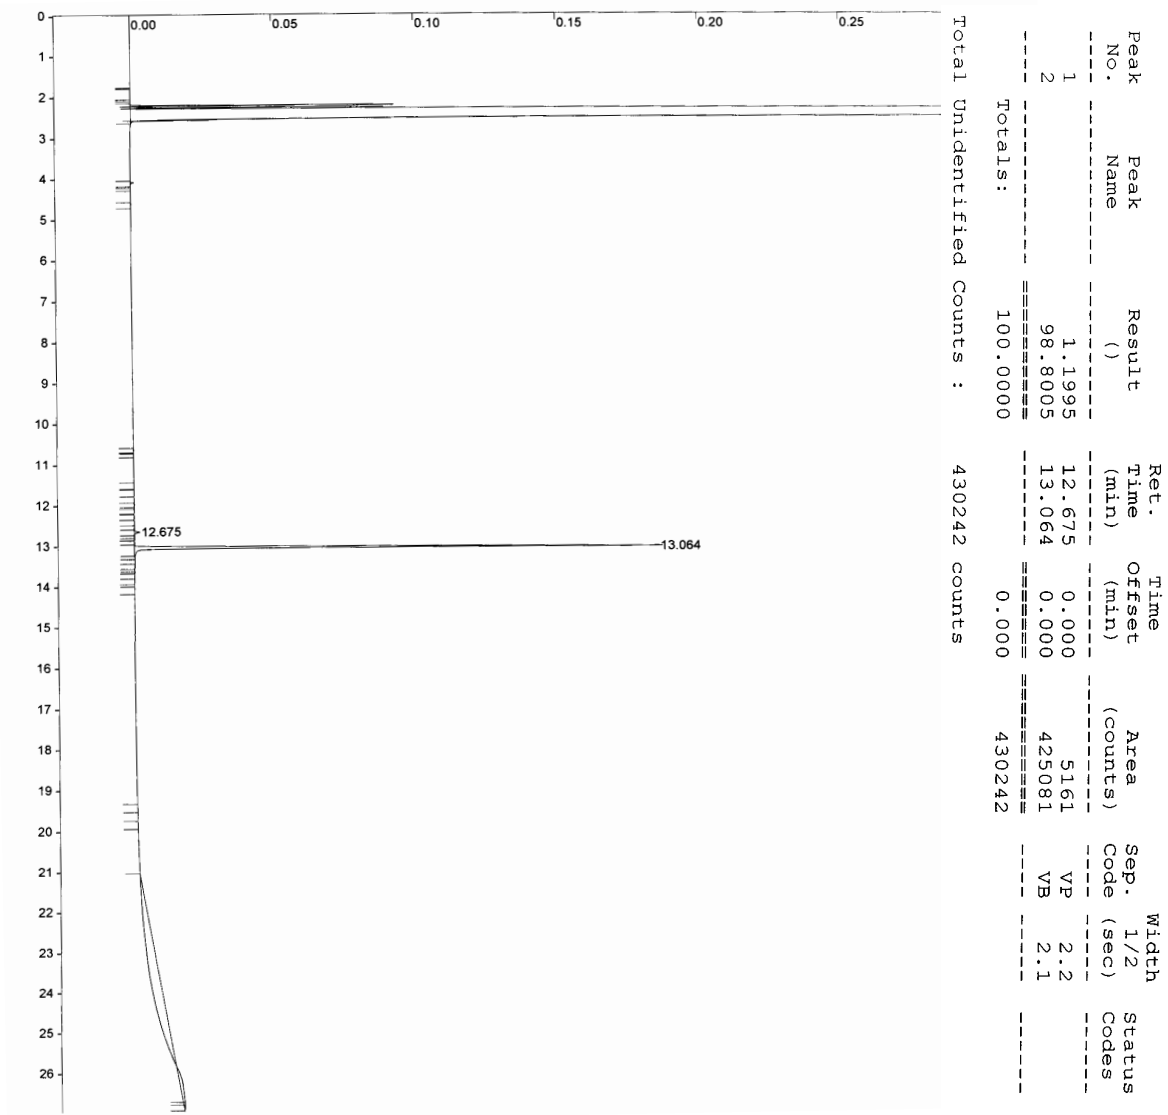

HPLC resolution of racemic **3** (Chiracel OD column, 99.8:0.2 hexanes:isopropanol, 1 mL/min, 220 nm)

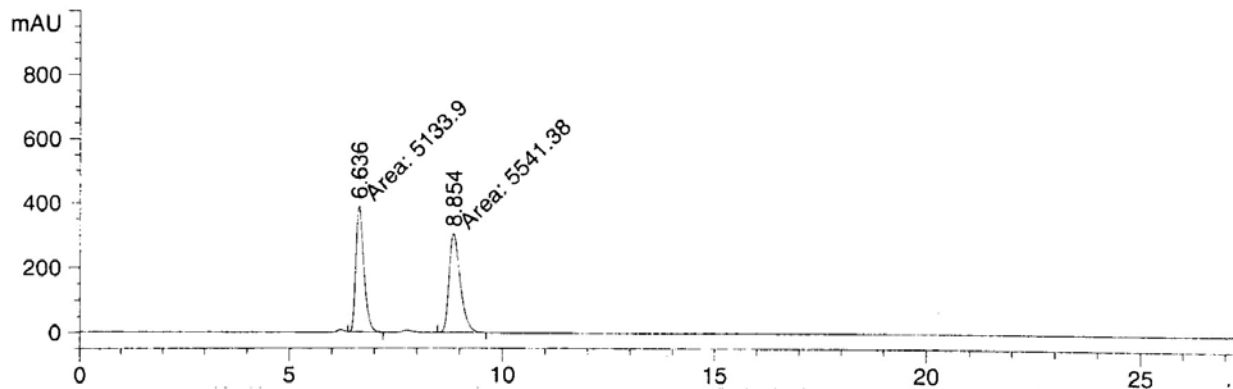

Enantiomeric excess of **3** (Chiracel OD column, 99.8:0.2 hexanes:isopropanol, 1 mL/min, 220 nm)

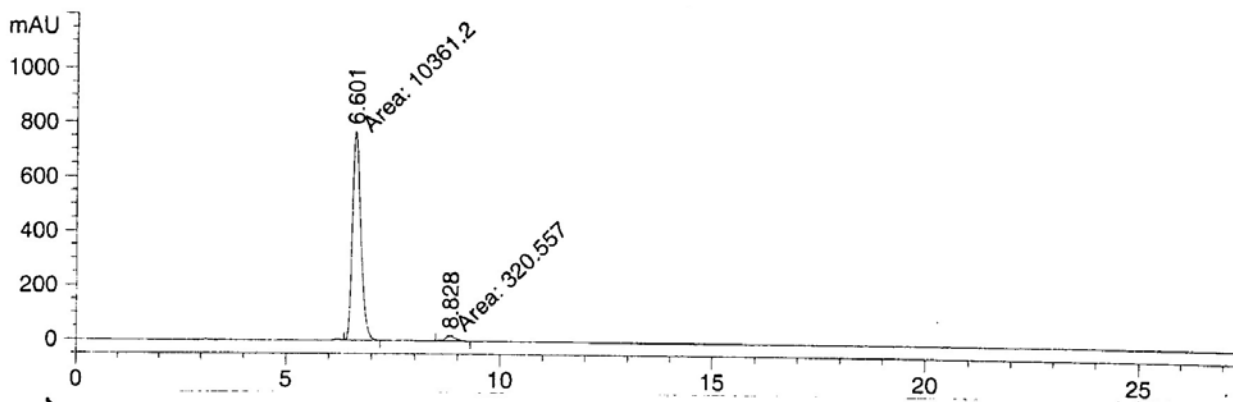

| Peak # | RetTime [min] | Type | Width [min] | Area [mAU*s] | Height [mAU] | Area %  |
|--------|---------------|------|-------------|--------------|--------------|---------|
| 1      | 6.601         | MM   | 0.2246      | 1.03612e4    | 768.95618    | 96.9990 |
| 2      | 8.828         | MM   | 0.2755      | 320.55746    | 19.39226     | 3.0010  |

Totals : 1.06818e4 788.34843

GC trace of **4** (Hewlett Packard HP1 column, 200 °C injection, 50–300 °C over 27 min)

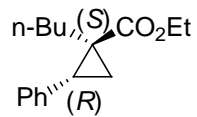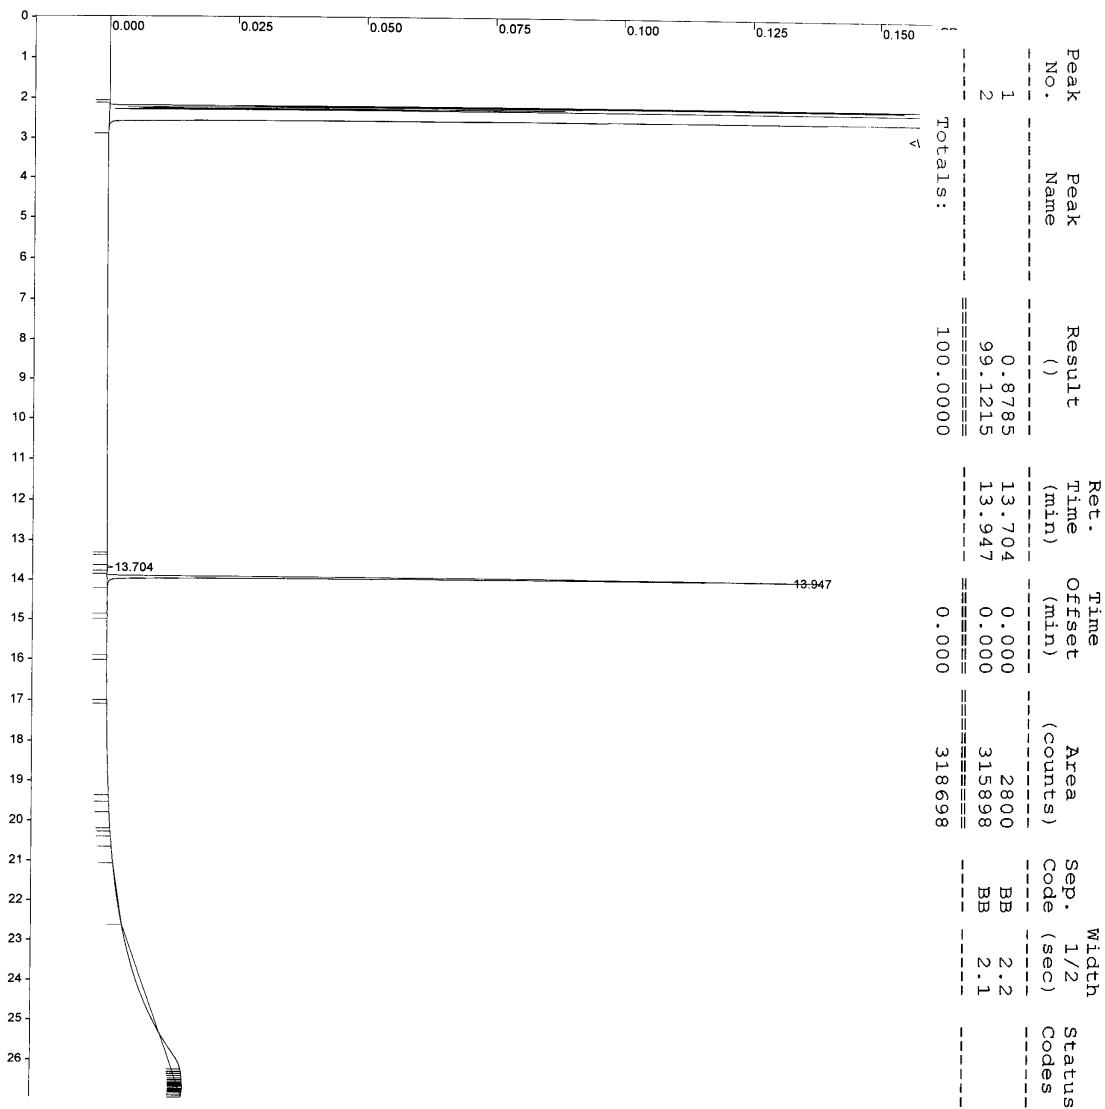

HPLC resolution of racemic **4** (Chiracel OD column, 99.9:0.1 hexanes:isopropanol, 1 mL/min, 220 nm)

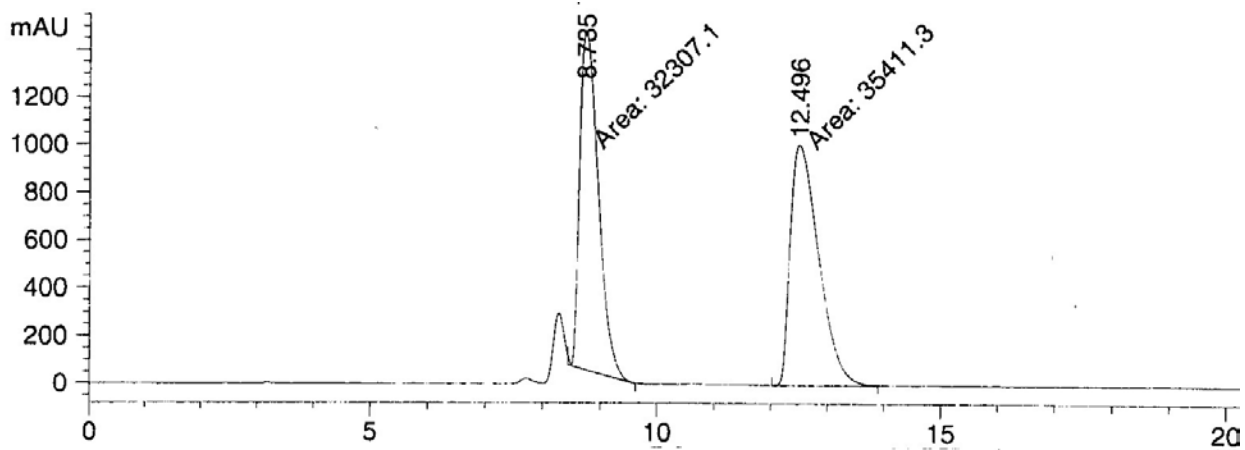

Enantiomeric excess of **4** (Chiracel OD column, 99.9:0.1 hexanes:isopropanol, 1 mL/min, 220 nm)

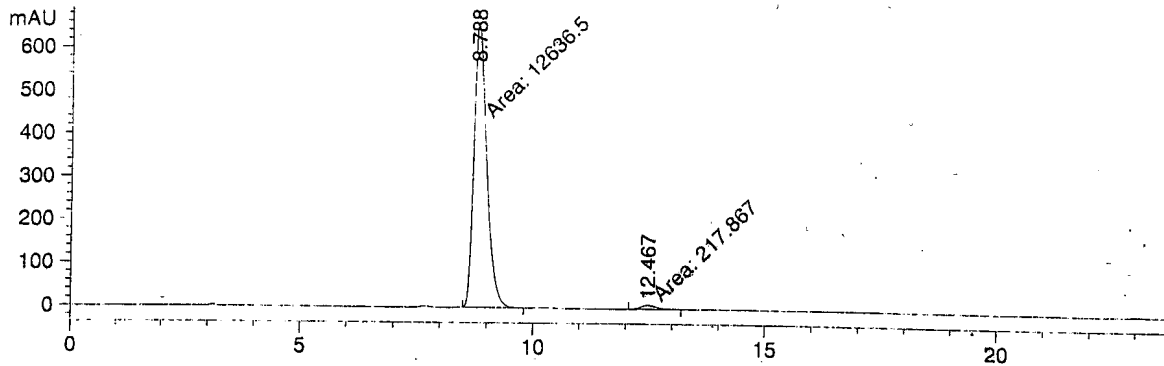

| Peak #   | RetTime [min] | Type | Width [min] | Area [mAU*s] | Height [mAU] | Area %  |
|----------|---------------|------|-------------|--------------|--------------|---------|
| 1        | 8.788         | MM   | 0.3187      | 1.26365e4    | 660.85651    | 98.3051 |
| 2        | 12.467        | MM   | 0.3976      | 217.86749    | 9.13299      | 1.6949  |
| Totals : |               |      |             | 1.28544e4    | 669.98949    |         |

$^1\text{H}$  NMR spectrum of **5** (400 MHz,  $\text{CDCl}_3$ )

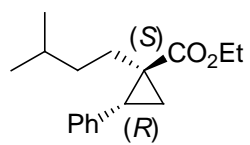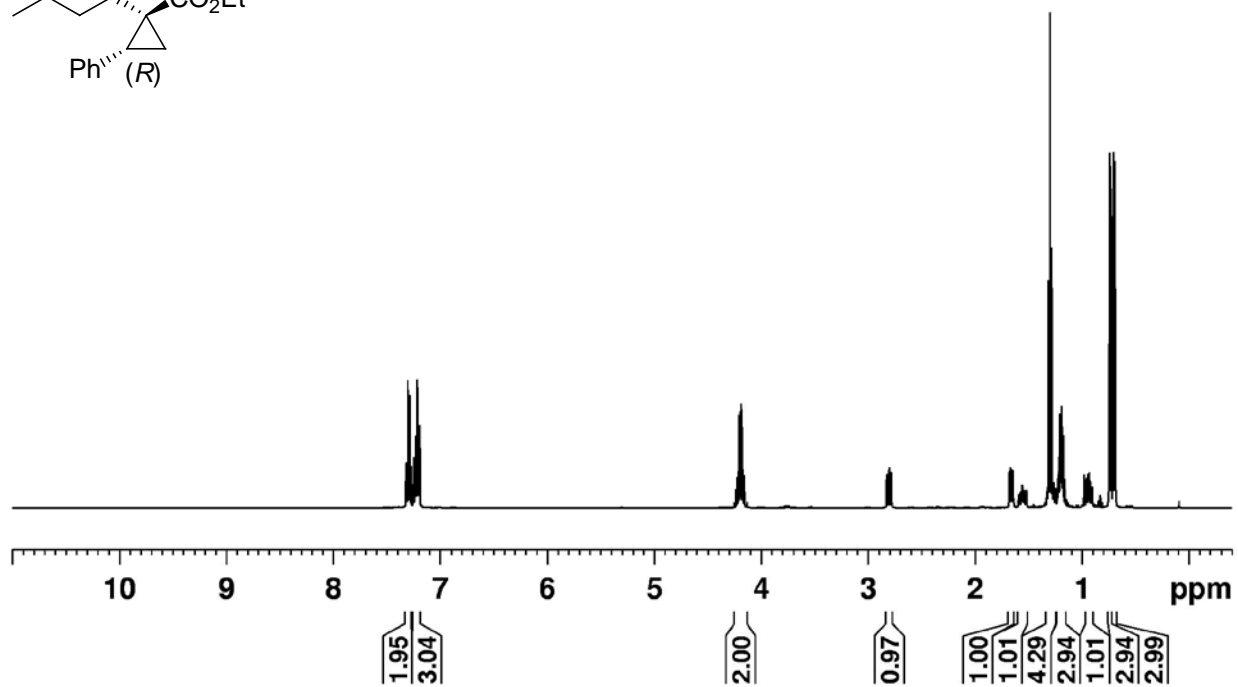

$^{13}\text{C}$  NMR spectrum of **5** (100 MHz,  $\text{CDCl}_3$ )

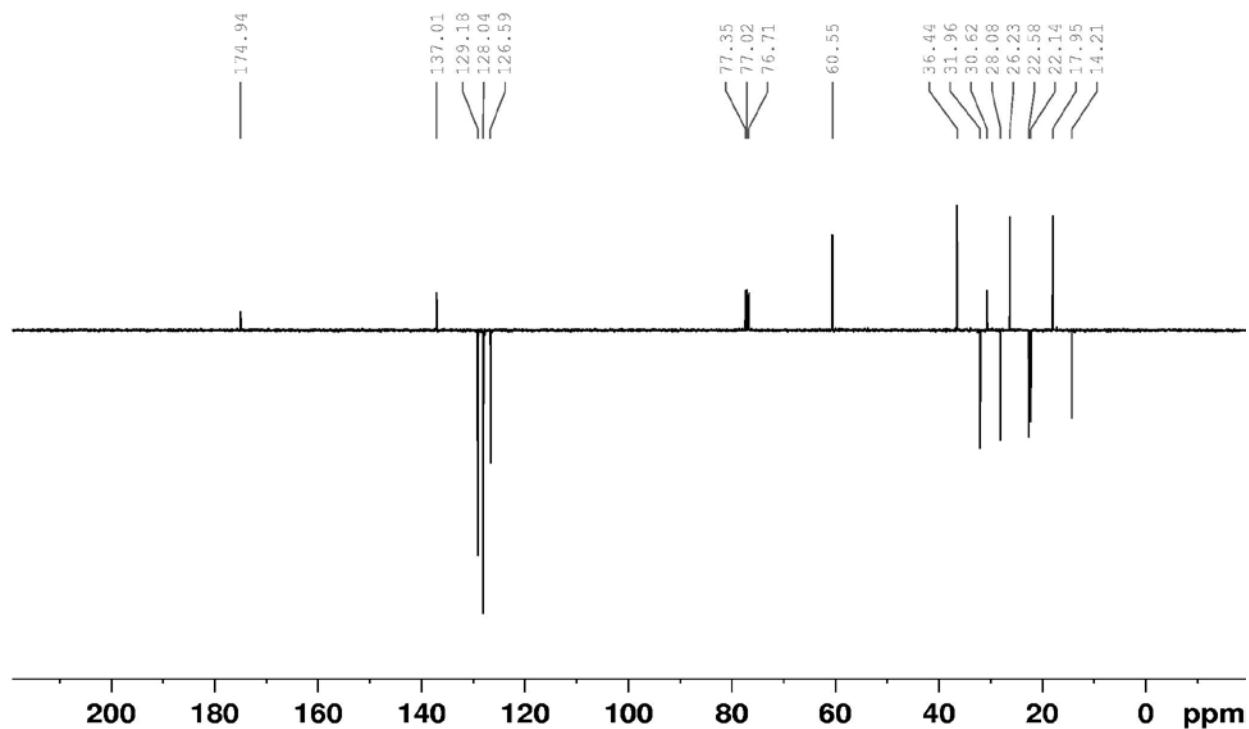



GC trace of 5 (Hewlett Packard HP1 column, 200 °C injection, 50–300 °C over 27 min)

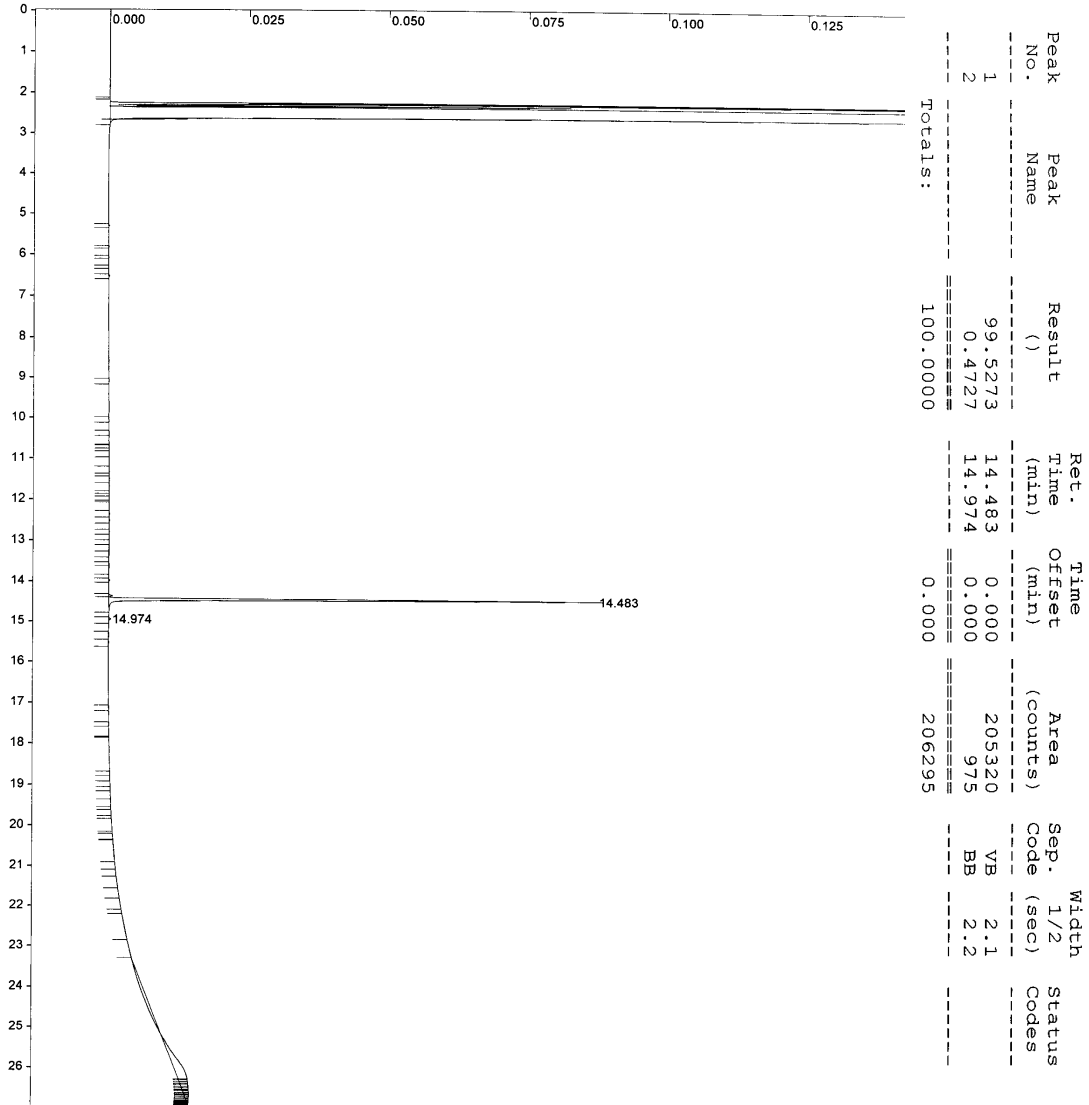

HPLC resolution of racemic **5** (Chiracel OD column, 99.8:0.2 hexanes:isopropanol, 1 mL/min, 220 nm)

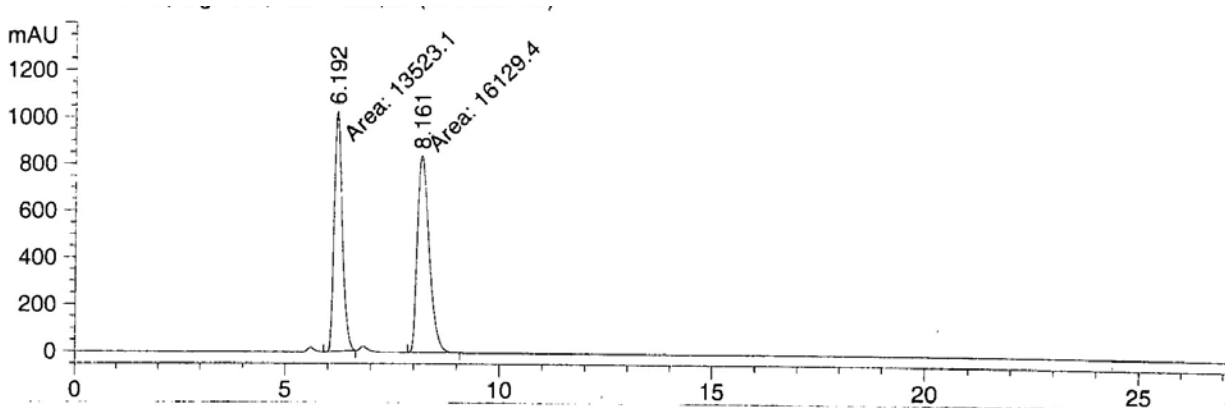

Enantiomeric excess of **5** (Chiracel OD column, 99.8:0.2 hexanes:isopropanol, 1 mL/min, 220 nm)

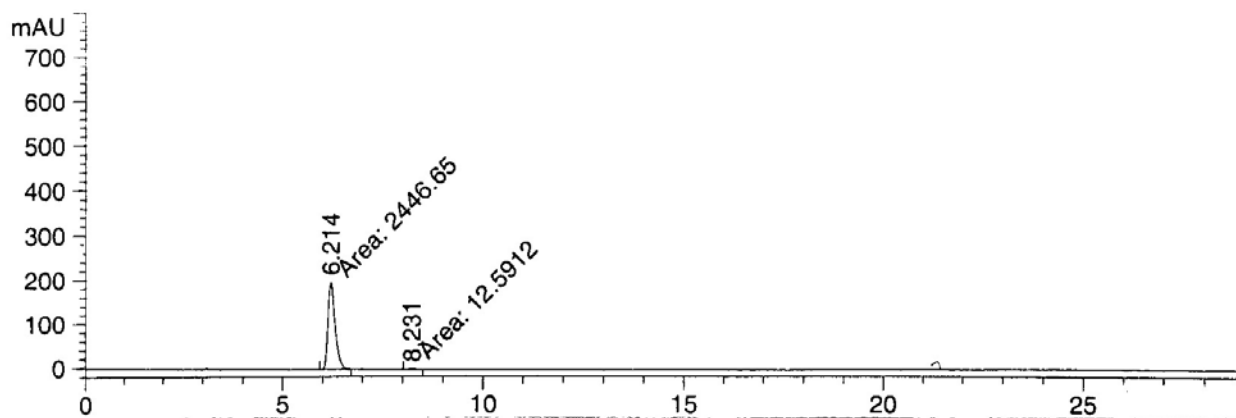

| Peak # | RetTime [min] | Type | Width [min] | Area [mAU*s] | Height [mAU] | Area %  |
|--------|---------------|------|-------------|--------------|--------------|---------|
| 1      | 6.214         | MM   | 0.2063      | 2446.64844   | 197.69658    | 99.4880 |
| 2      | 8.231         | MM   | 0.2252      | 12.59121     | 9.31769e-1   | 0.5120  |

Totals : 2459.23964 198.62835

$^1\text{H}$  NMR spectrum of **6** (400 MHz,  $\text{CDCl}_3$ )

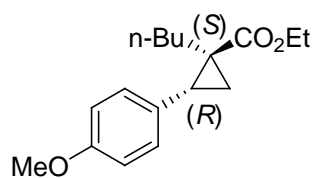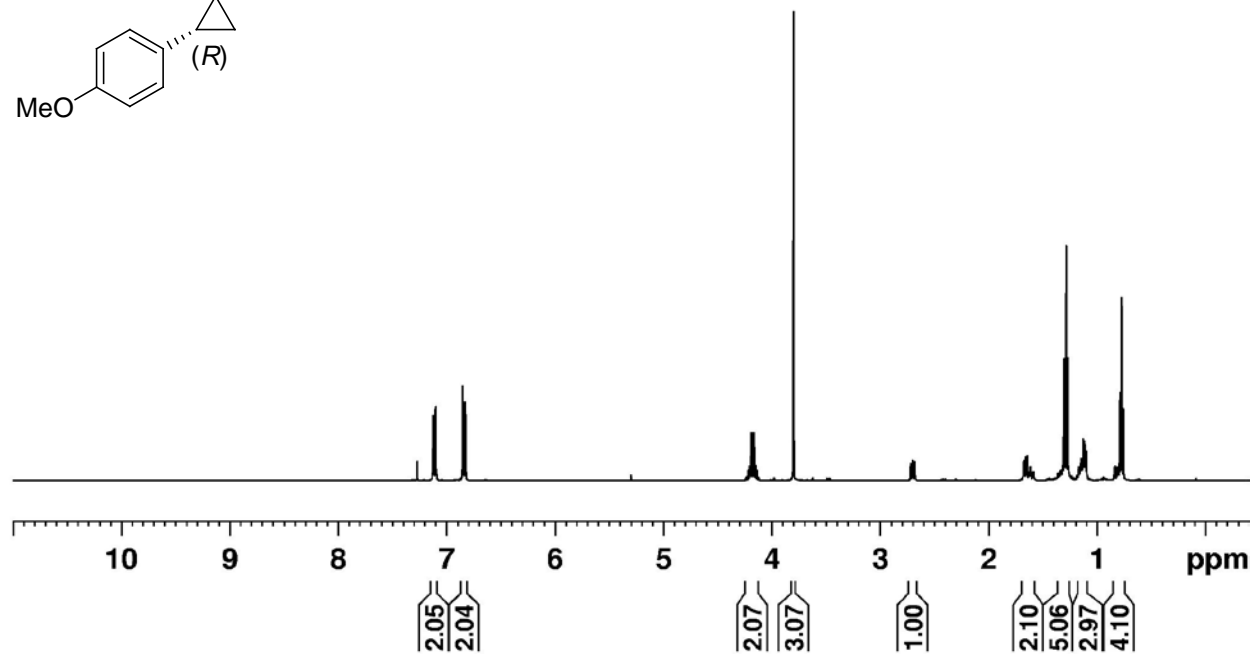

$^{13}\text{C}$  NMR spectrum of **6** (100 MHz,  $\text{CDCl}_3$ )

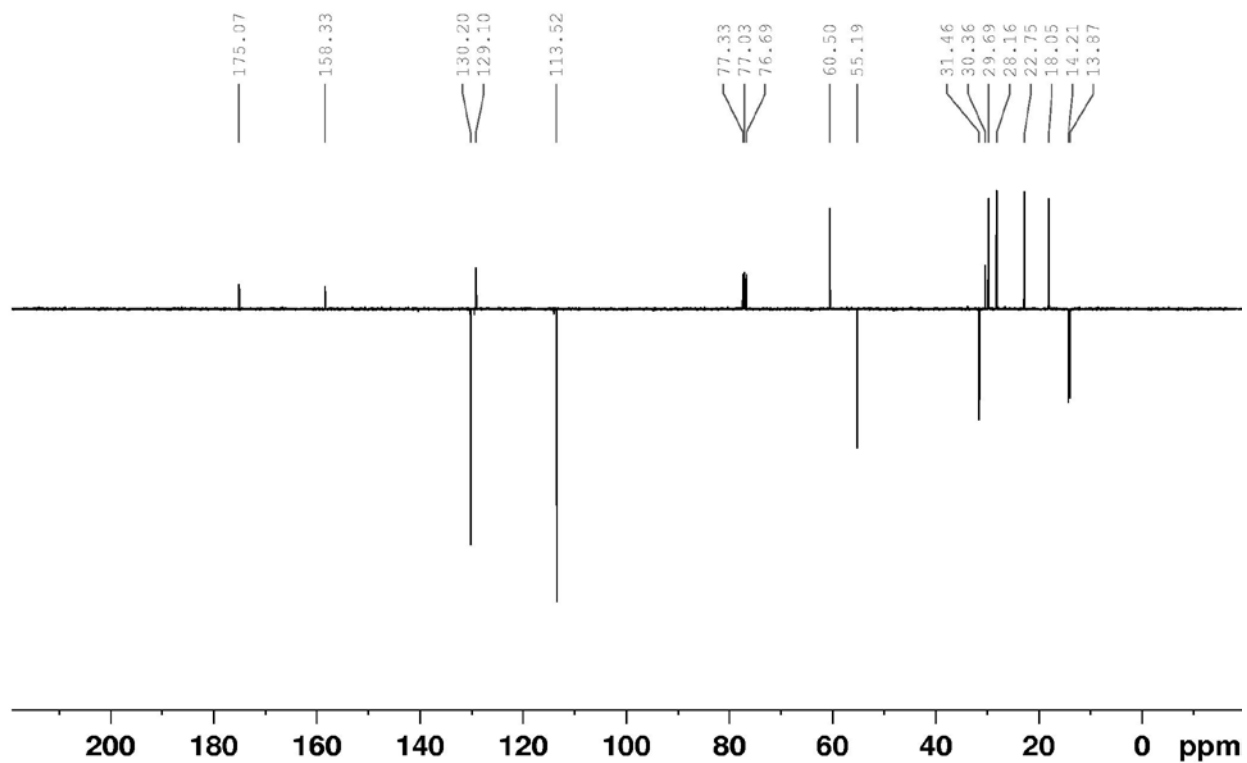

GC trace of 6 (Hewlett Packard HP1 column, 200 °C injection, 50–300 °C over 27 min)

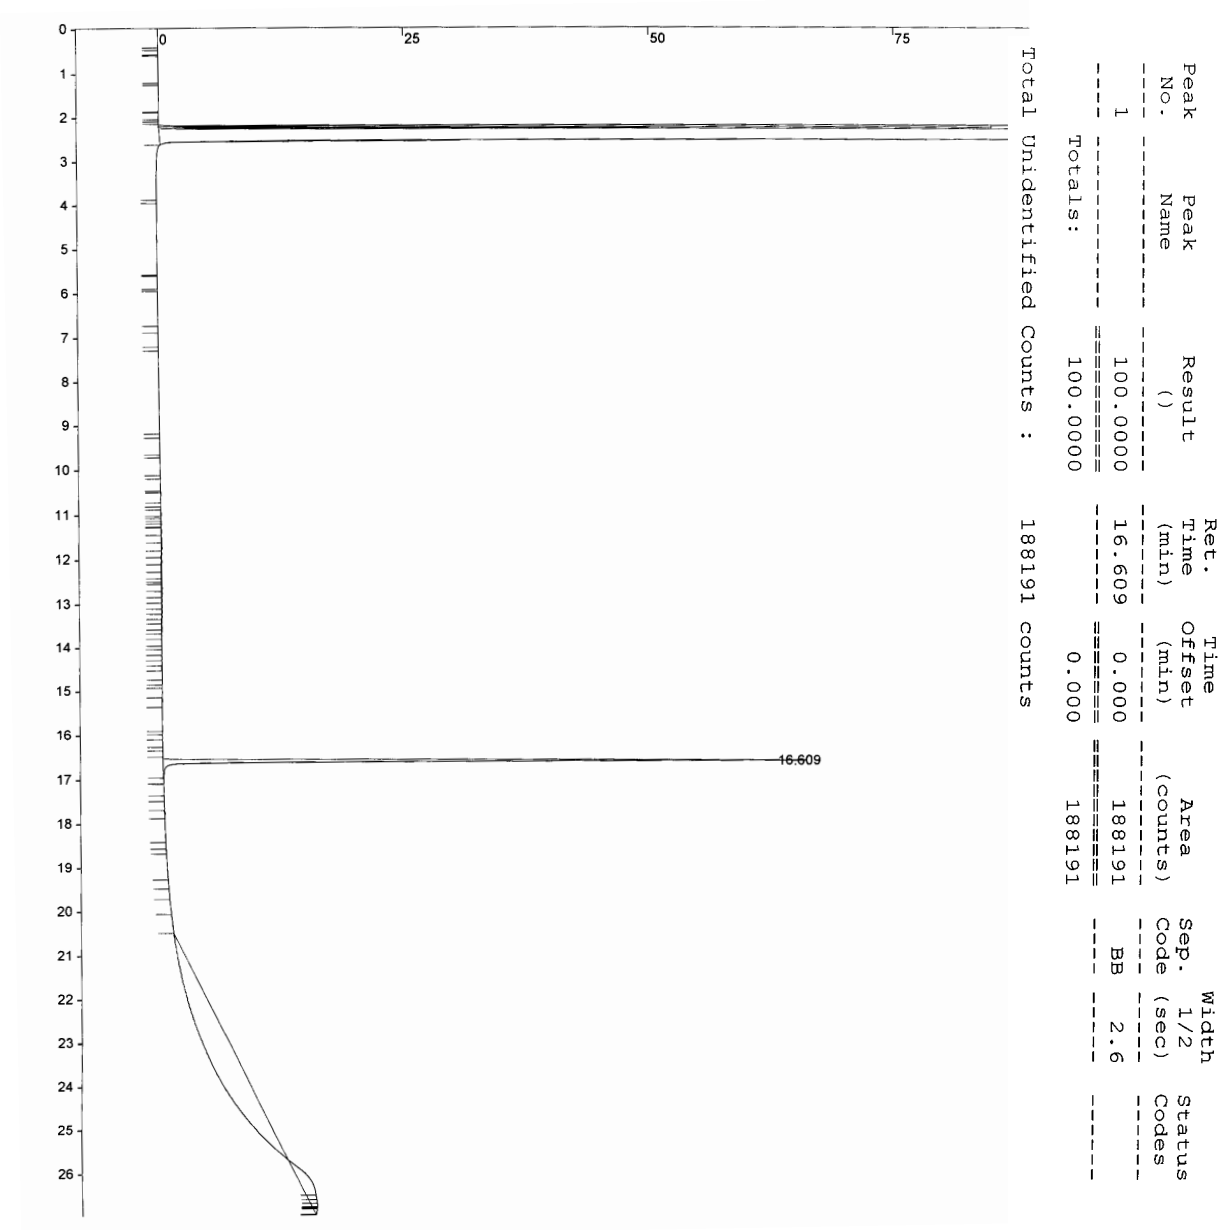

GC trace of **7** (Hewlett Packard HP1 column, 200 °C injection, 50–300 °C over 27 min)

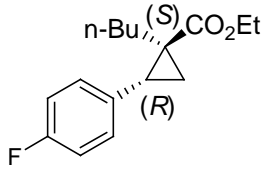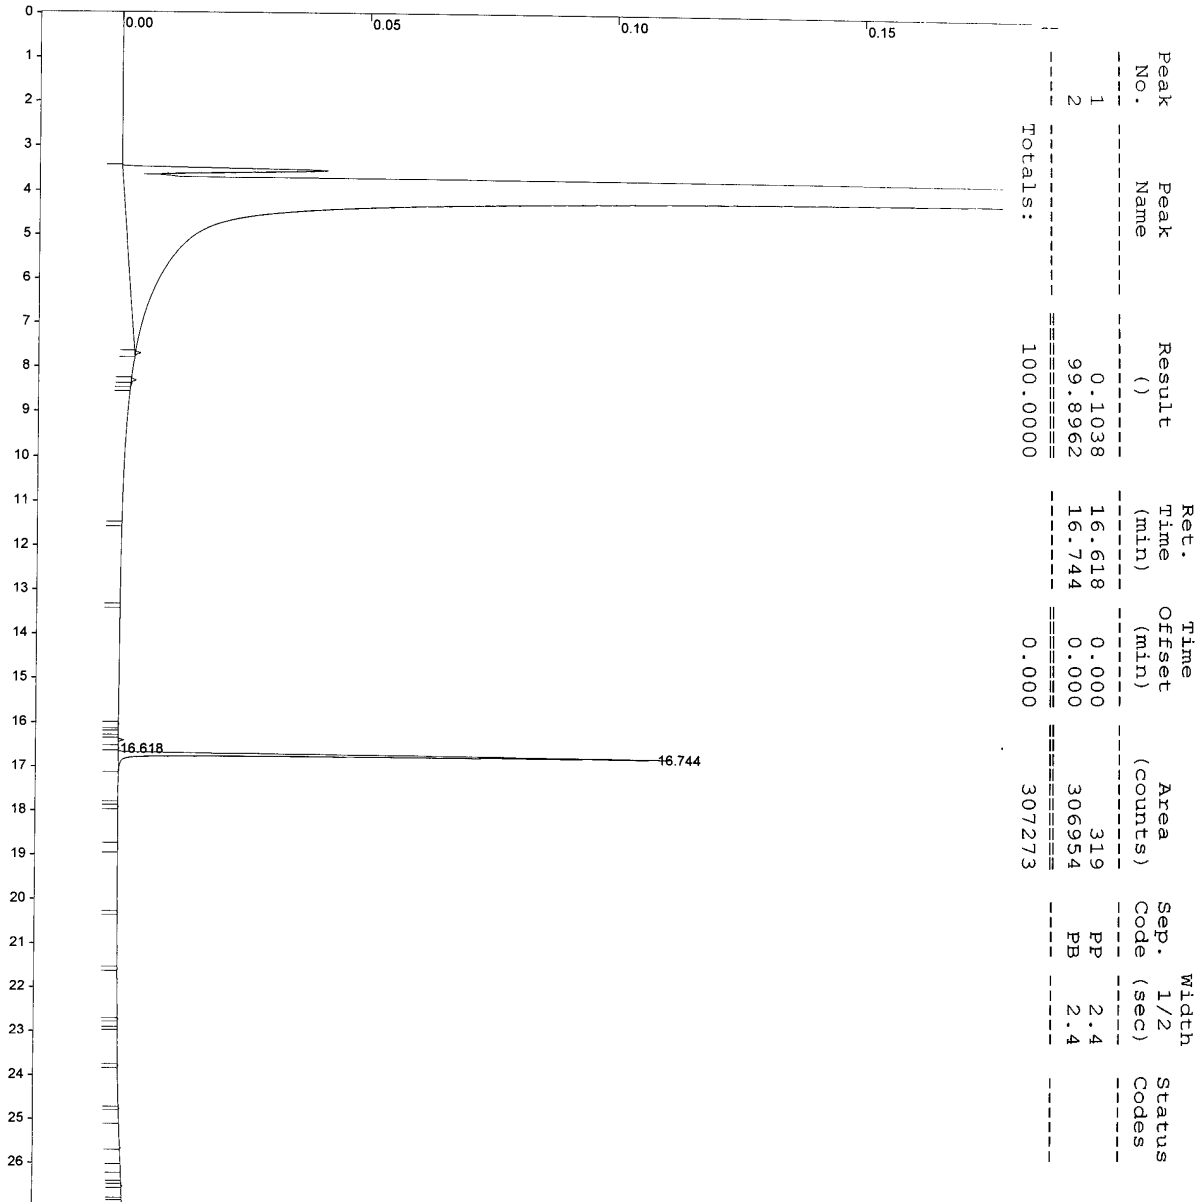

$^1\text{H}$  NMR spectrum of **8** (400 MHz,  $\text{CDCl}_3$ ) (93% purity)

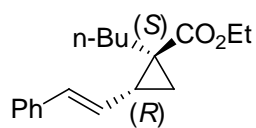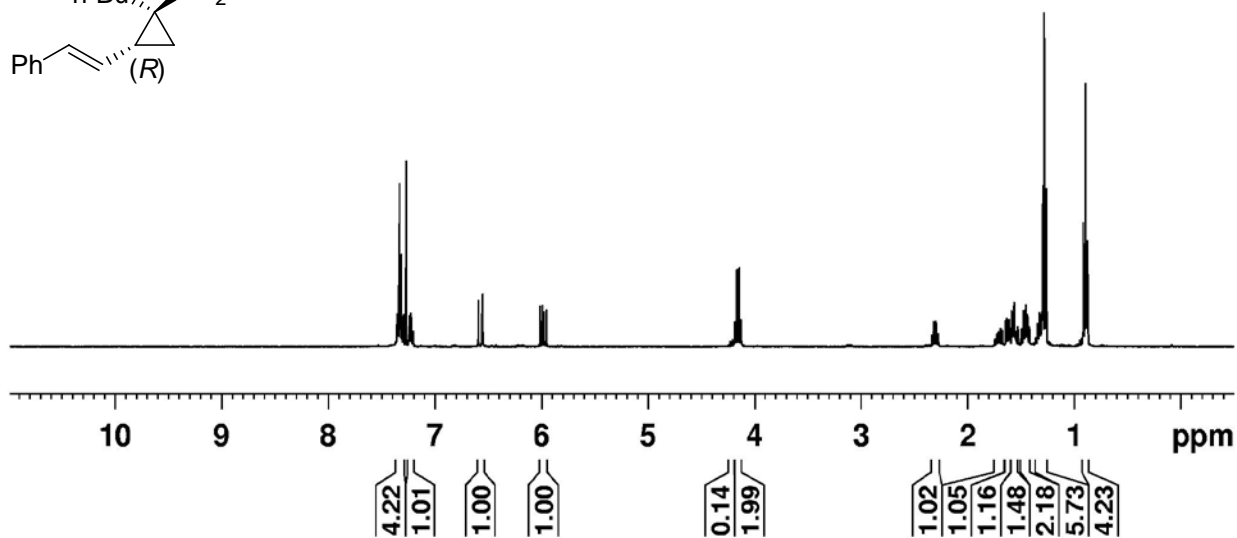

$^{13}\text{C}$  NMR spectrum of **8** (100 MHz,  $\text{CDCl}_3$ ) (93% purity)

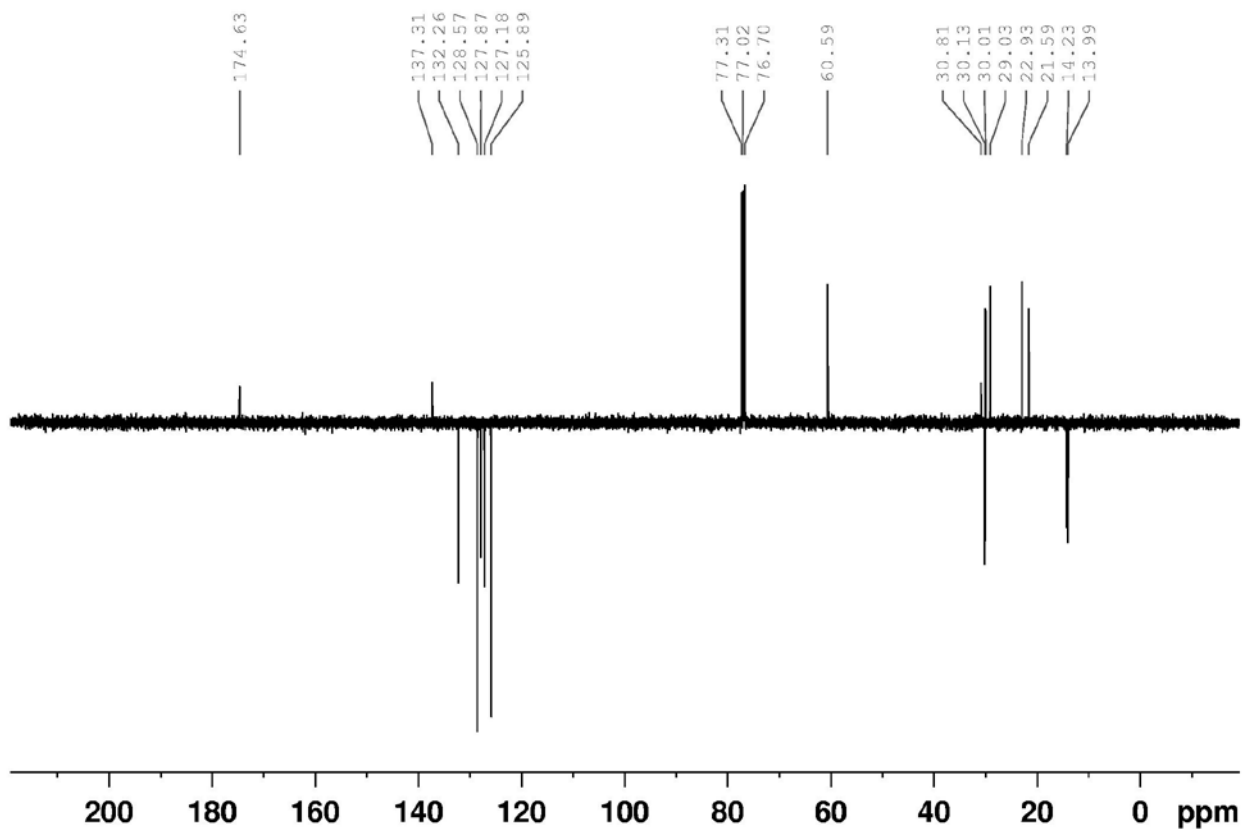

GC trace of 8 (Hewlett Packard HP1 column, 200 °C injection, 50–300 °C over 27 min)

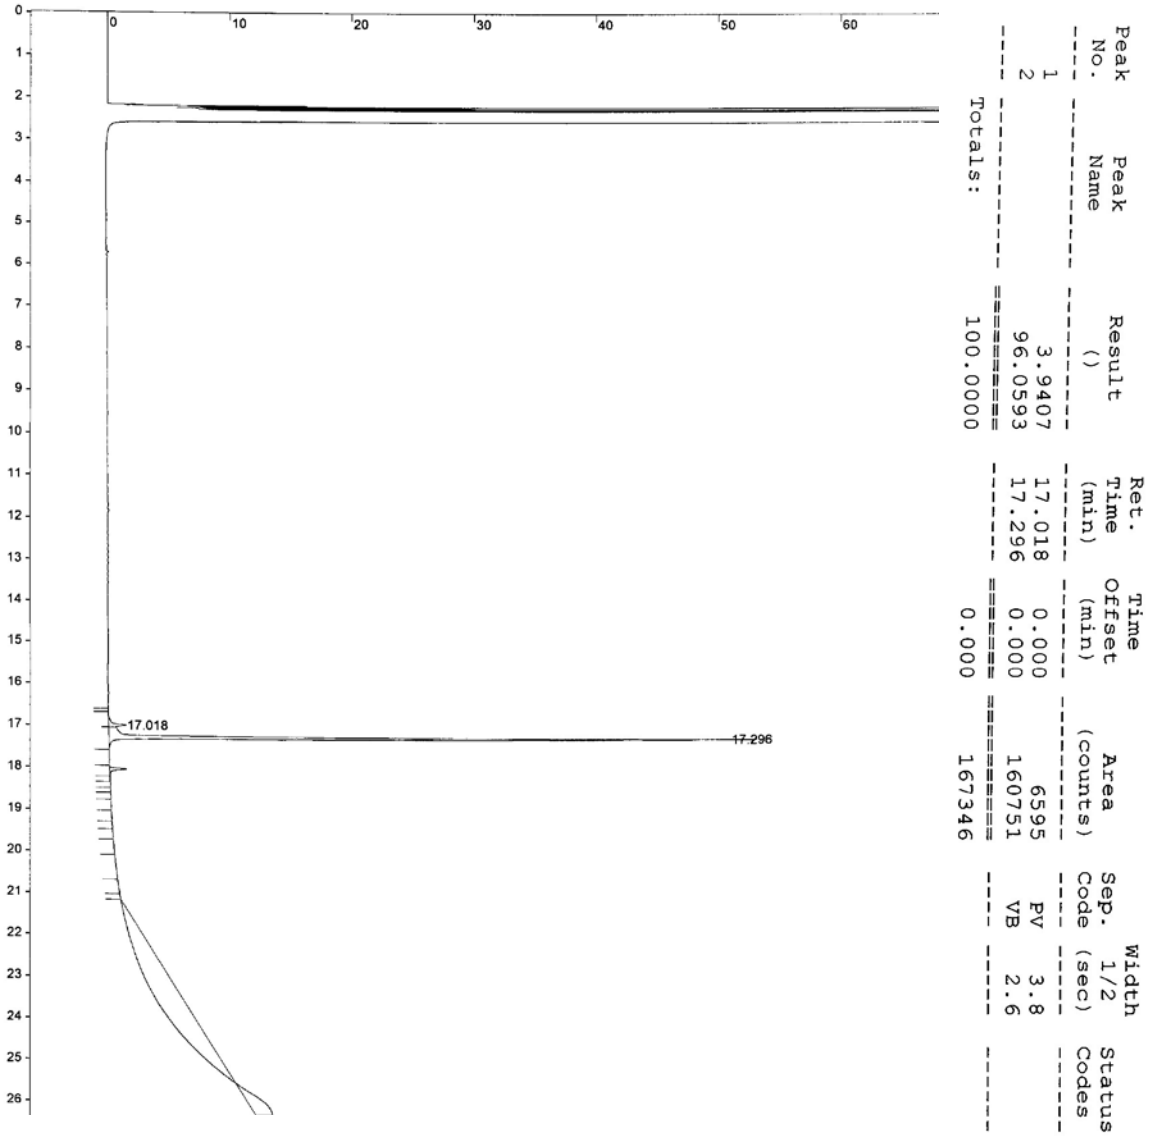

HPLC resolution of racemic **8** (Chiracel OD column, 99.8:0.2 hexanes:isopropanol, 1 mL/min, 220 nm)

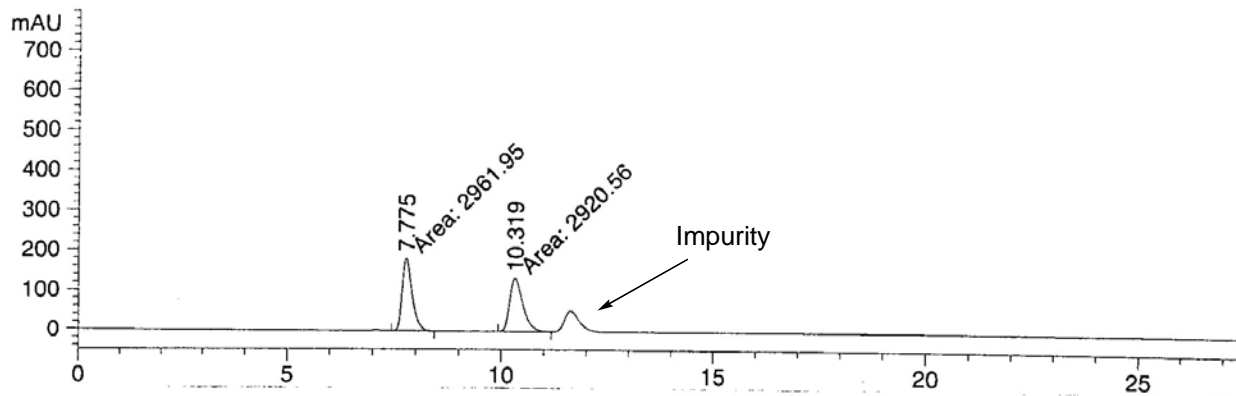

Enantiomeric excess of **8** (Chiracel OD column, 99.8:0.2 hexanes:isopropanol, 1 mL/min, 220 nm)

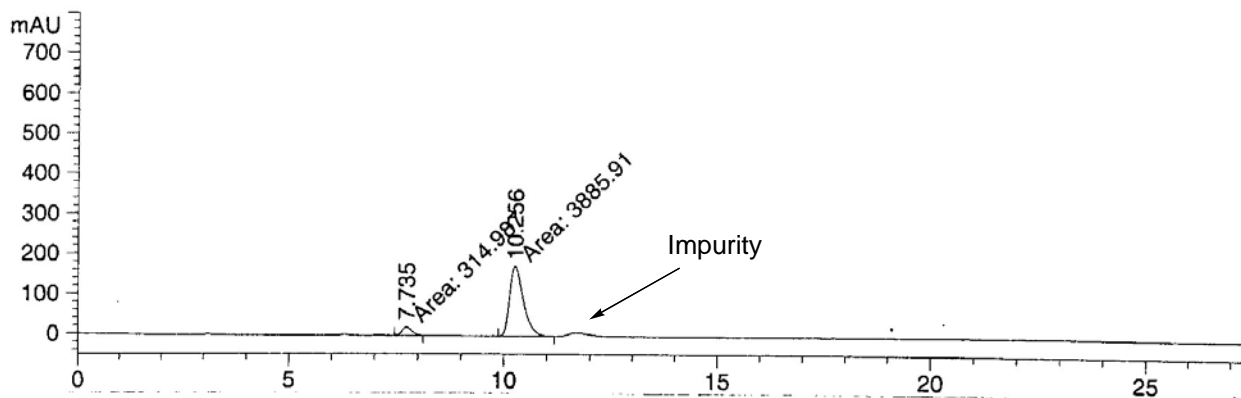

| Peak #   | RetTime [min] | Type | Width [min] | Area [mAU*s] | Height [mAU] | Area %  |
|----------|---------------|------|-------------|--------------|--------------|---------|
| 1        | 7.735         | MM   | 0.2528      | 314.98734    | 20.76708     | 7.4981  |
| 2        | 10.256        | MM   | 0.3726      | 3885.90942   | 173.83311    | 92.5019 |
| Totals : |               |      |             | 4200.89676   | 194.60020    |         |



$^1\text{H}$  NMR spectrum of **9** (400 MHz,  $\text{CDCl}_3$ )

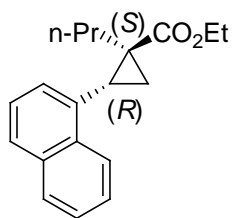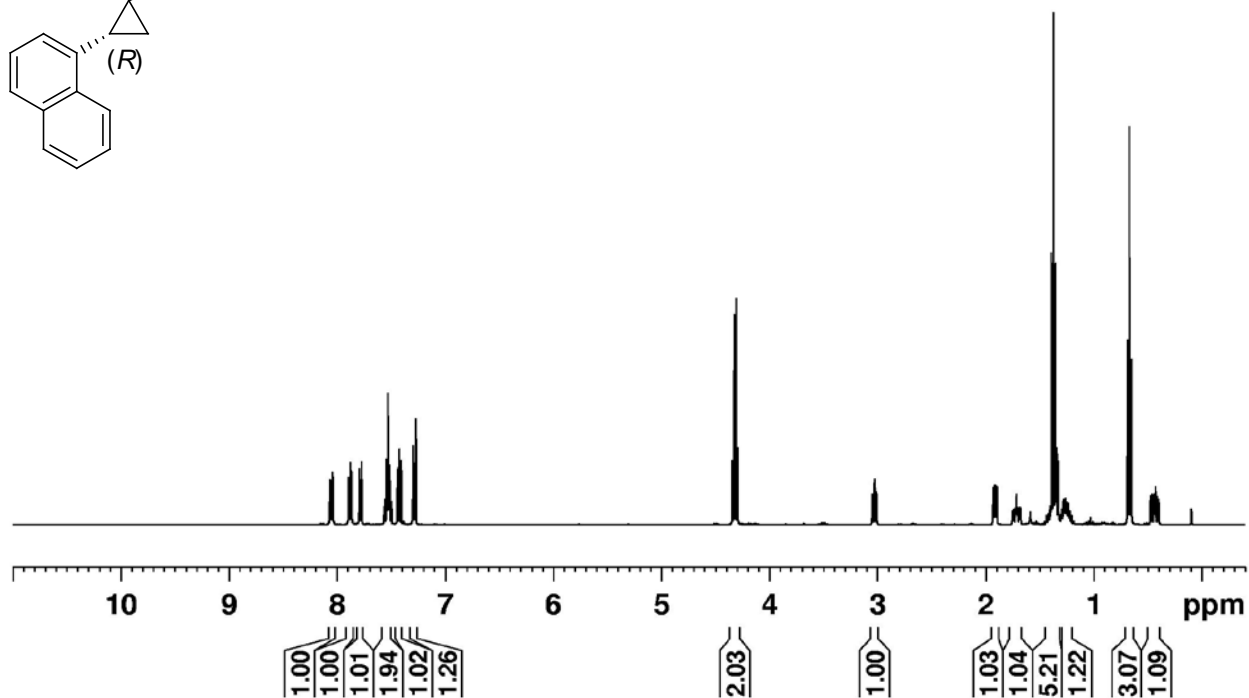

$^{13}\text{C}$  NMR spectrum of **9** (100 MHz,  $\text{CDCl}_3$ )

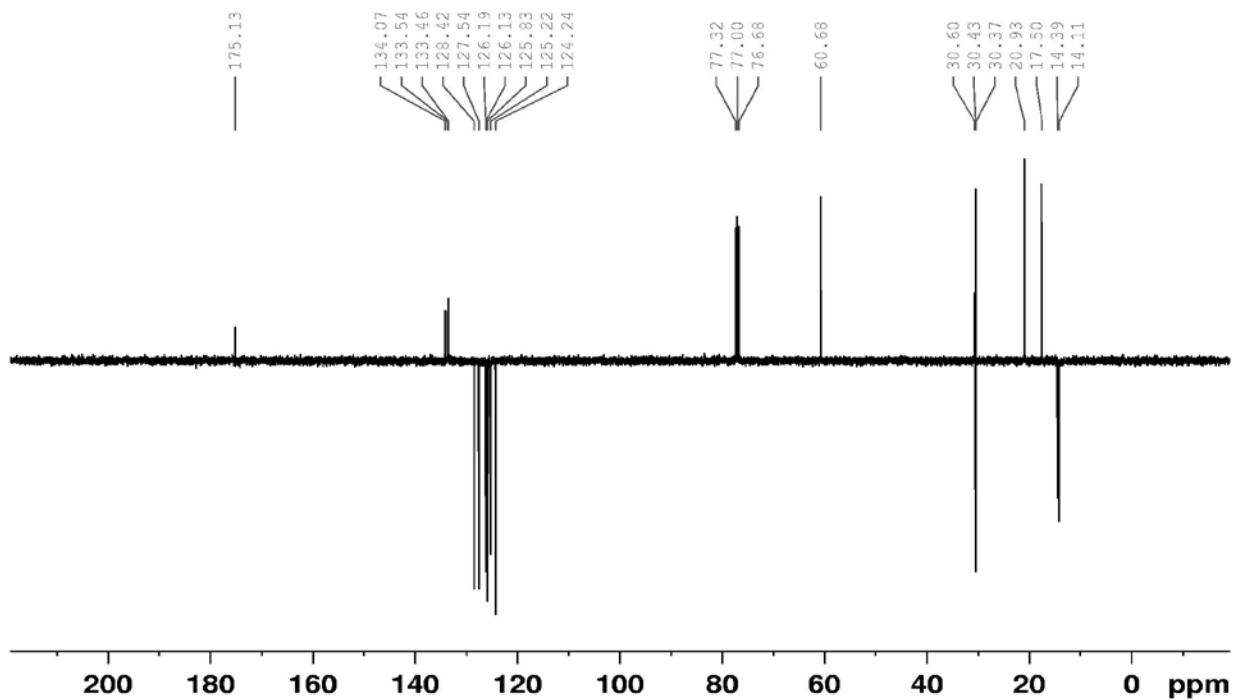

GC trace of 9 (Hewlett Packard HP1 column, 200 °C injection, 50–300 °C over 27 min)

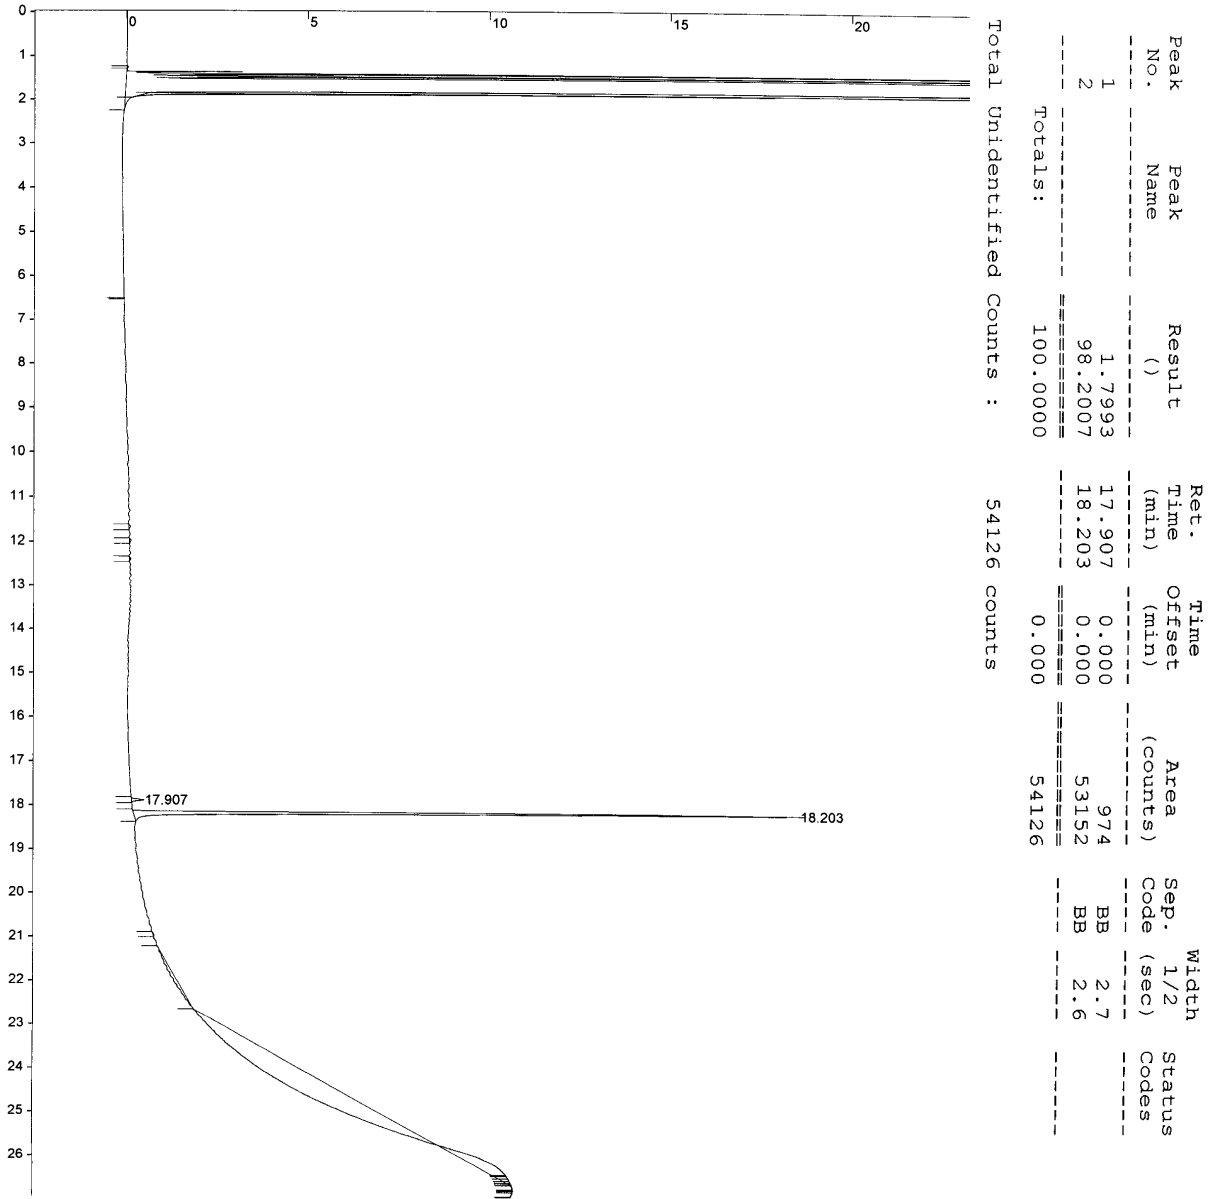

GC trace of **10** (Hewlett Packard HP1 column, 200 °C injection, 50–300 °C over 27 min)

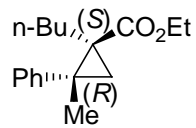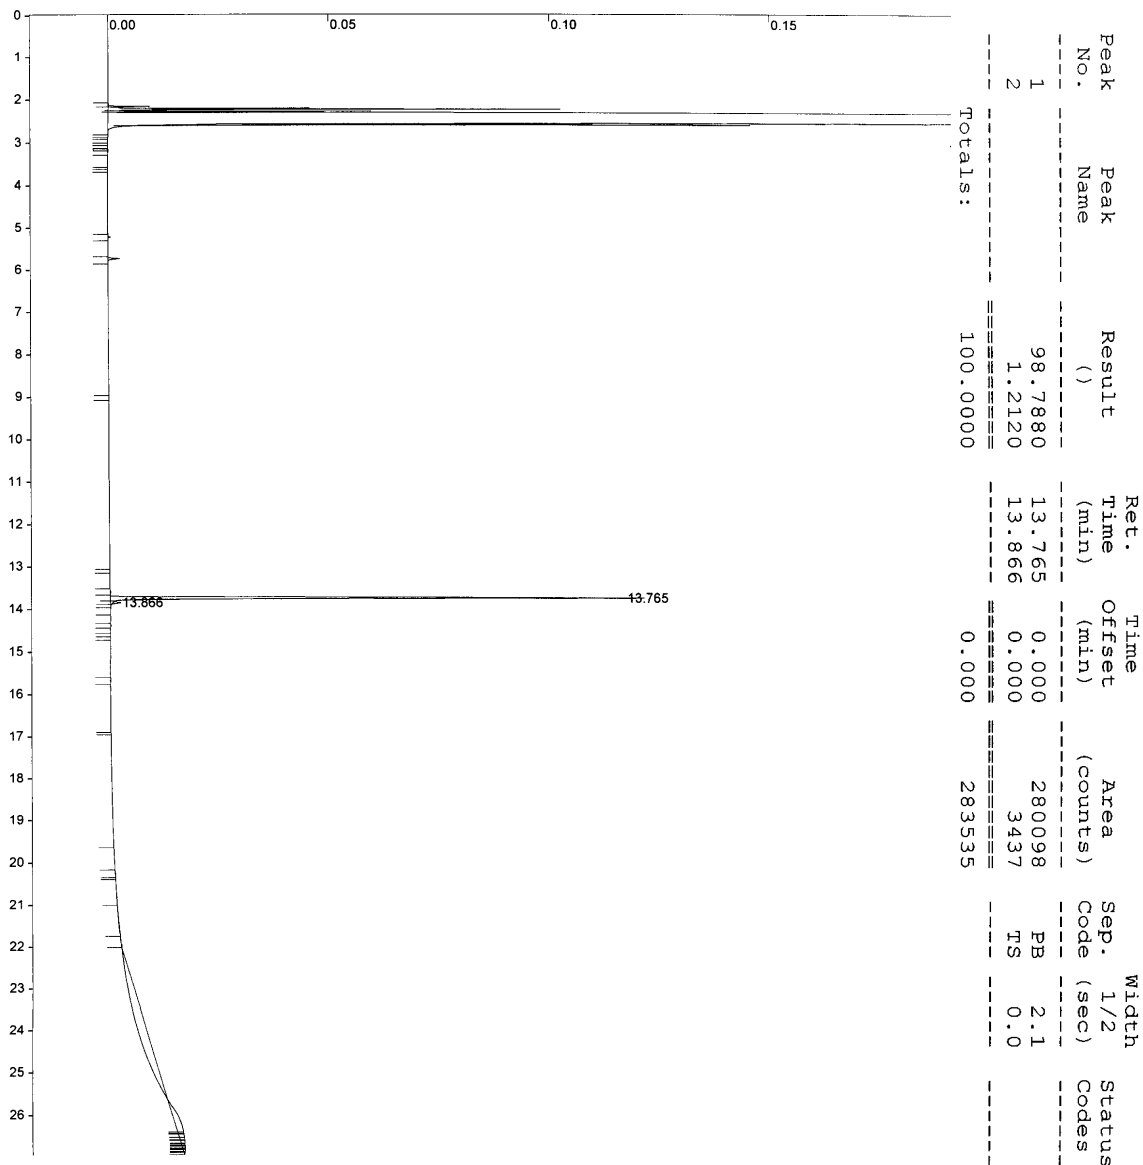

HPLC resolution of racemic **10** (Chiracel OD column, 99.9:0.1 hexanes:isopropanol, 1 mL/min, 220 nm)

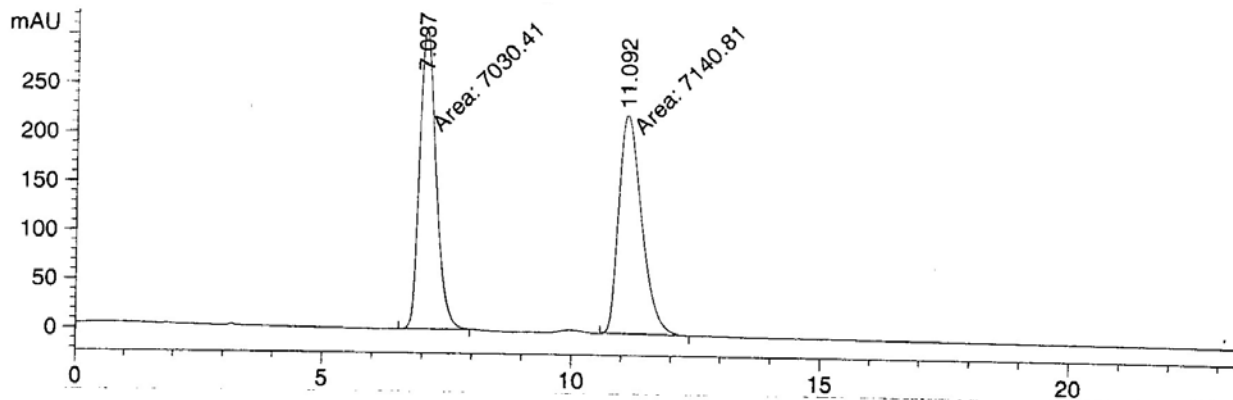

Enantiomeric excess of **10** (Chiracel OD column, 99.9:0.1 hexanes:isopropanol, 1 mL/min, 220 nm)

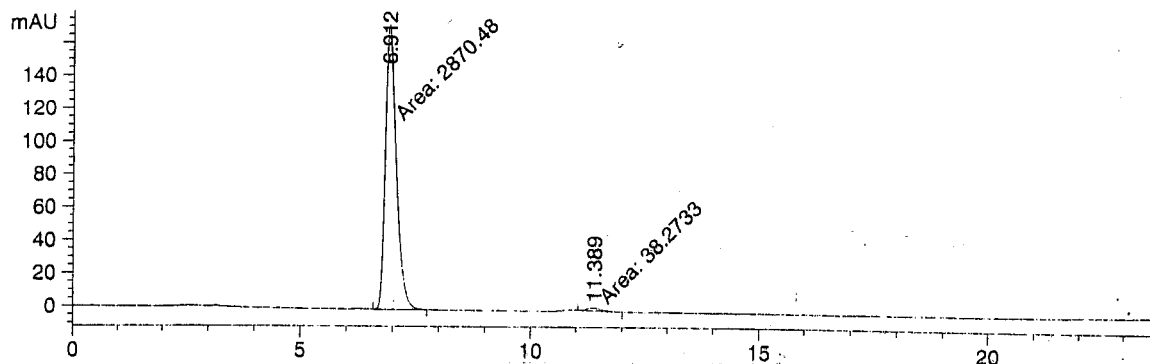

| Peak #   | RetTime [min] | Type | Width [min] | Area [mAU*s] | Height [mAU] | Area %  |
|----------|---------------|------|-------------|--------------|--------------|---------|
| 1        | 6.912         | MM   | 0.2762      | 2870.47803   | 173.22308    | 98.6842 |
| 2        | 11.389        | MM   | 0.3320      | 38.27334     | 1.92132      | 1.3158  |
| Totals : |               |      |             | 2908.75137   | 175.14440    |         |

$^1\text{H}$  NMR spectrum of **11** (400 MHz,  $\text{CDCl}_3$ )

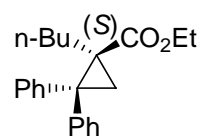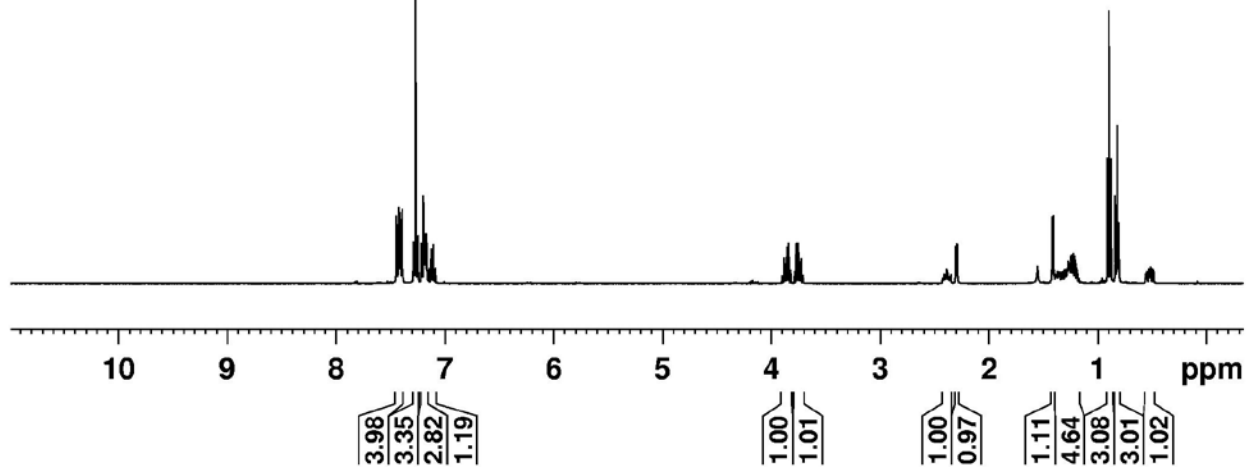

$^{13}\text{C}$  NMR spectrum of **11** (100 MHz,  $\text{CDCl}_3$ )

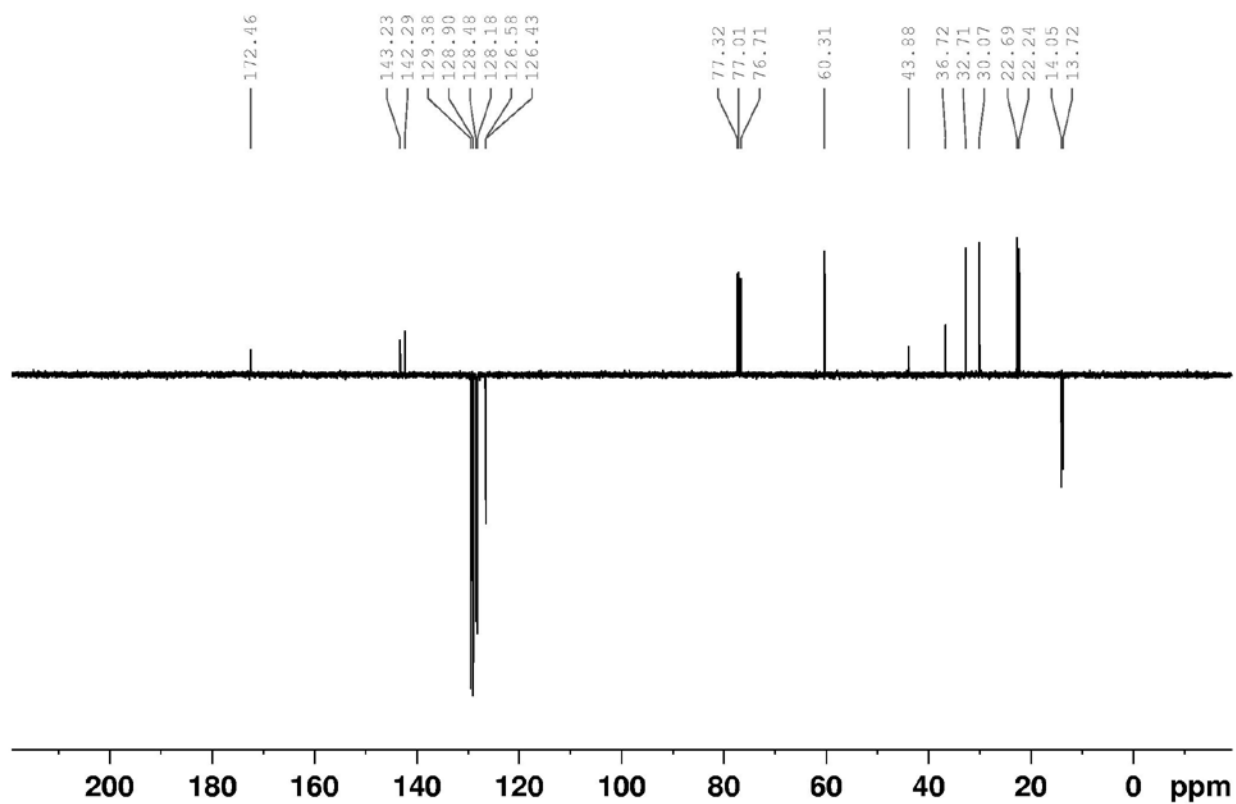

$^1\text{H}$  NMR spectrum of **12** (400 MHz,  $\text{CDCl}_3$ )

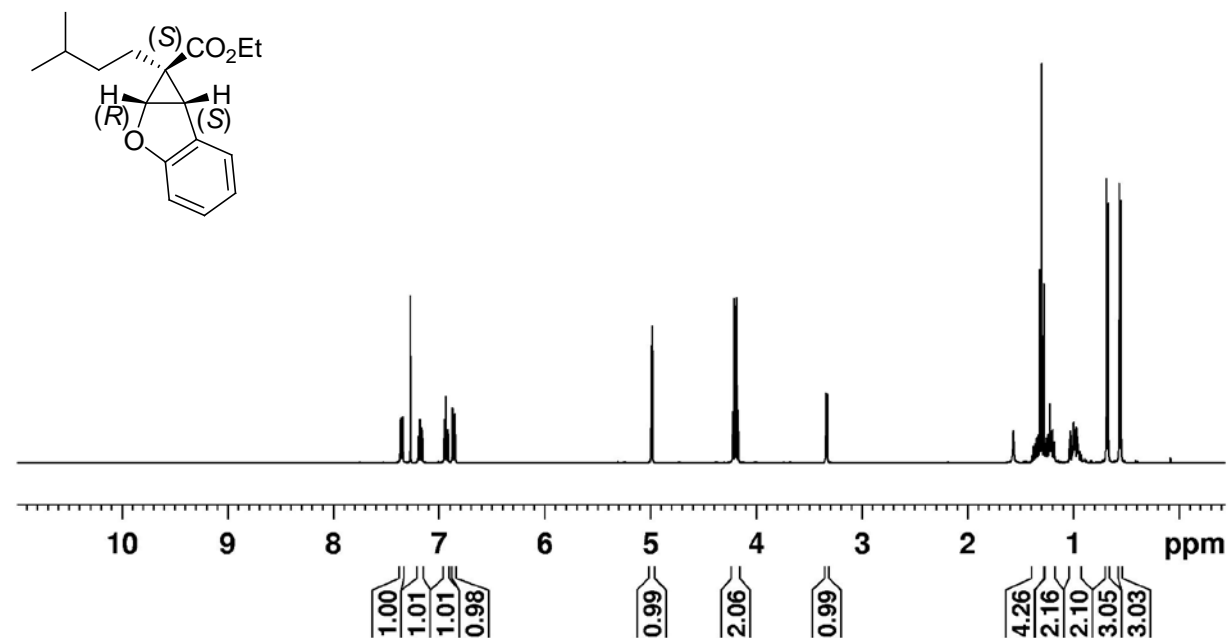

$^{13}\text{C}$  NMR spectrum of **12** (100 MHz,  $\text{CDCl}_3$ )

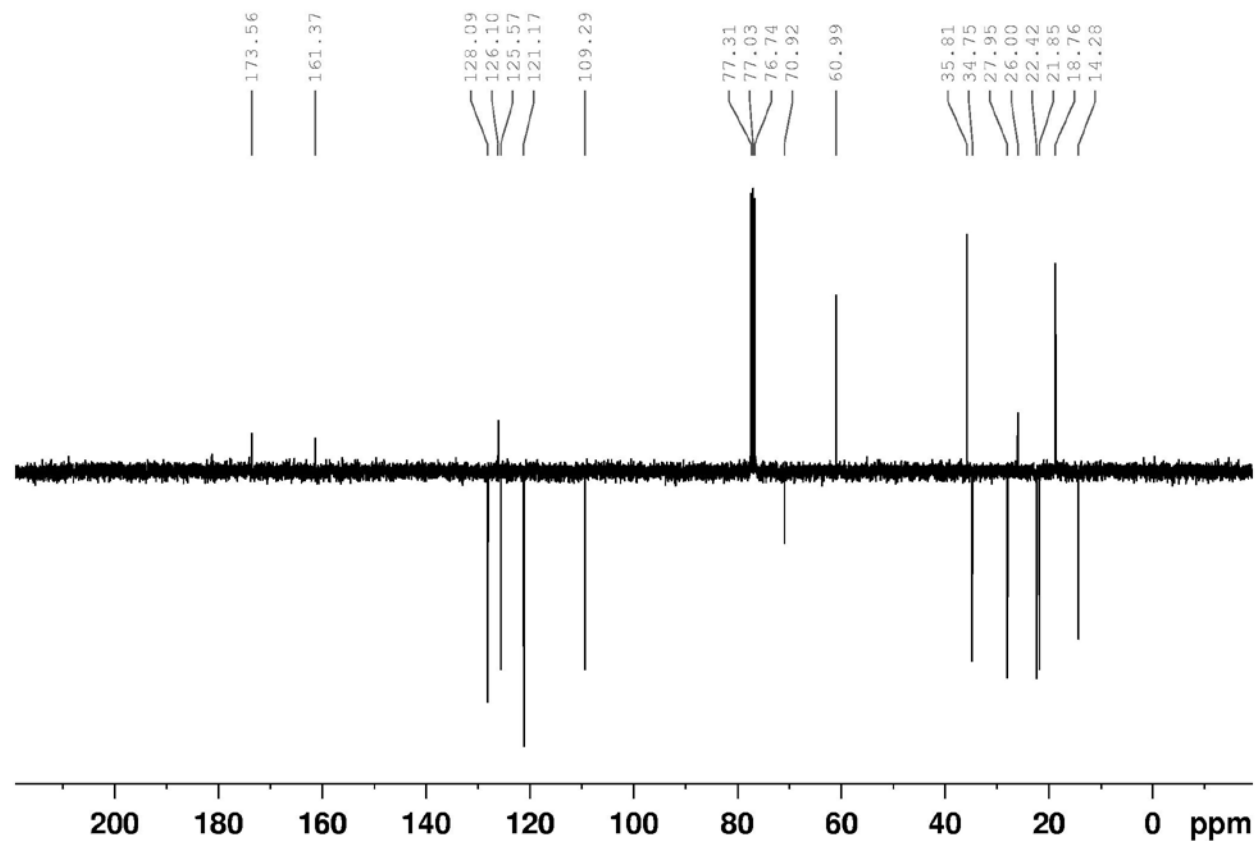

GC trace of **12** (Hewlett Packard HP1 column, 200 °C injection, 50–300 °C over 27 min)

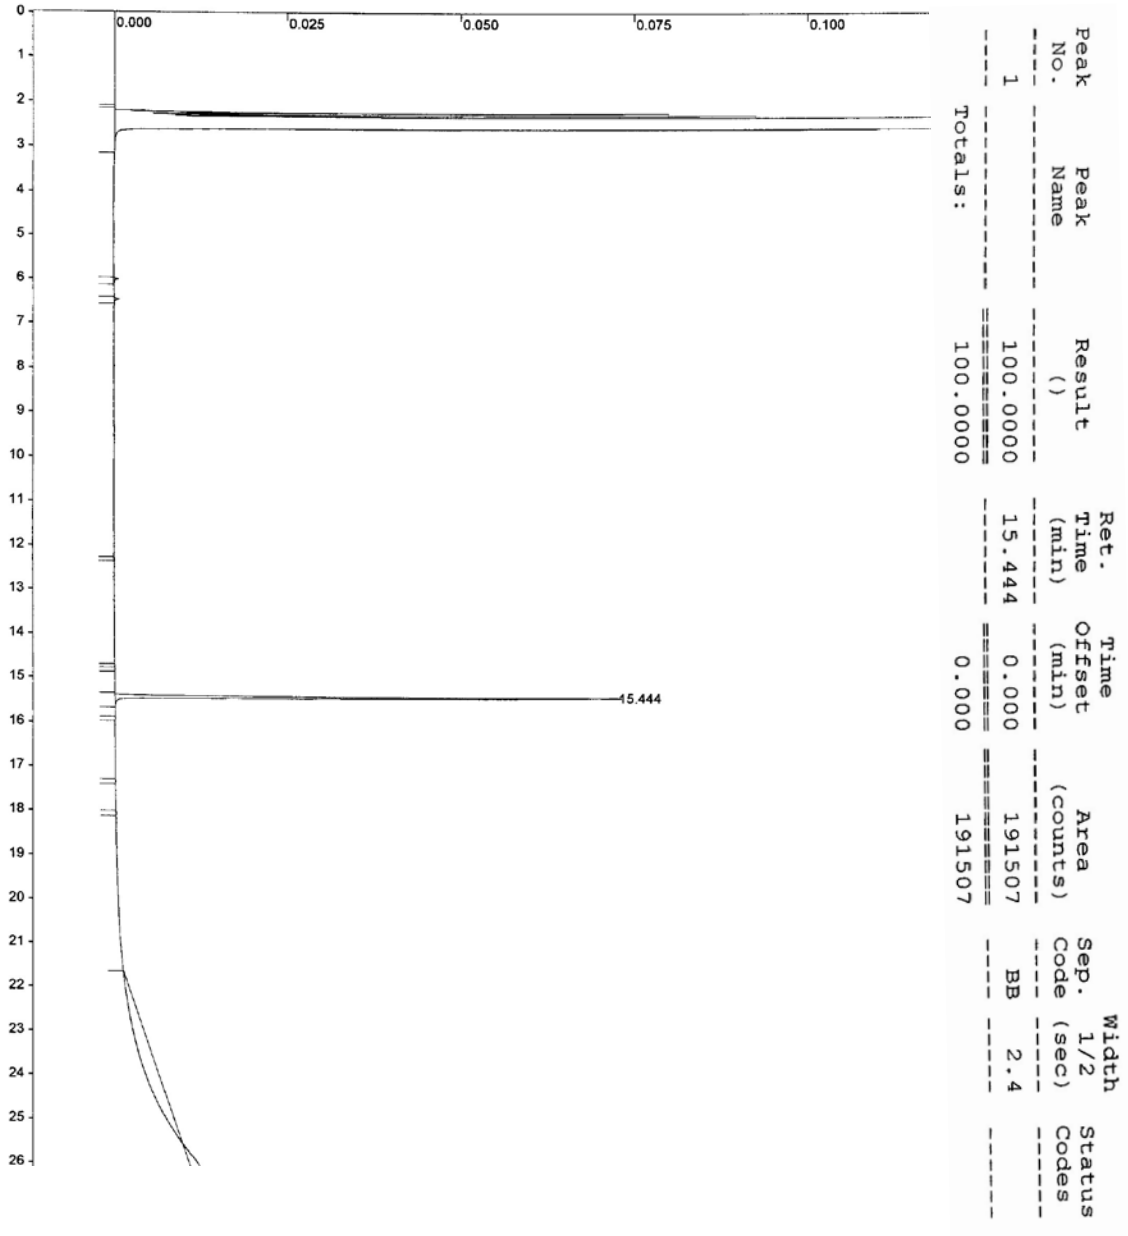

HPLC resolution of racemic **12** (Chiracel OD column, 99.9:0.1 hexanes:isopropanol, 1 mL/min, 220 nm)

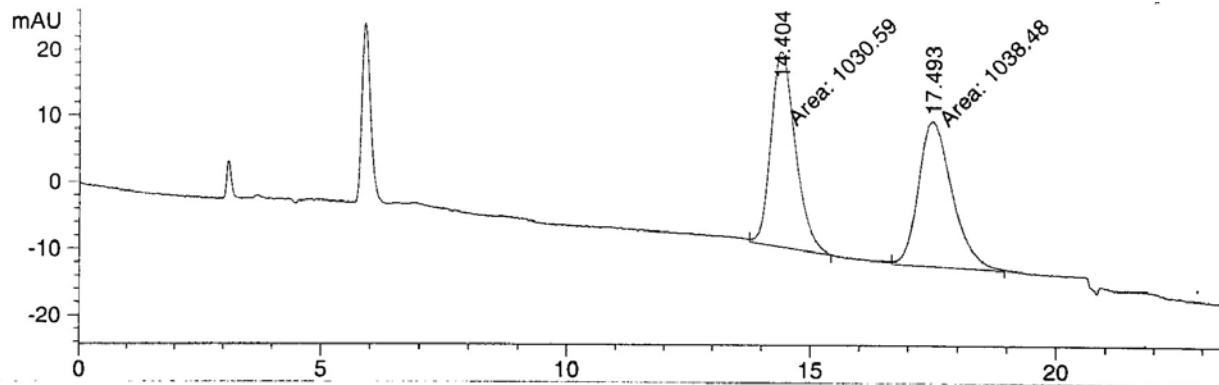

Enantiomeric excess of **12** (Chiracel OD column, 99.9:0.1 hexanes:isopropanol, 1 mL/min, 220 nm)

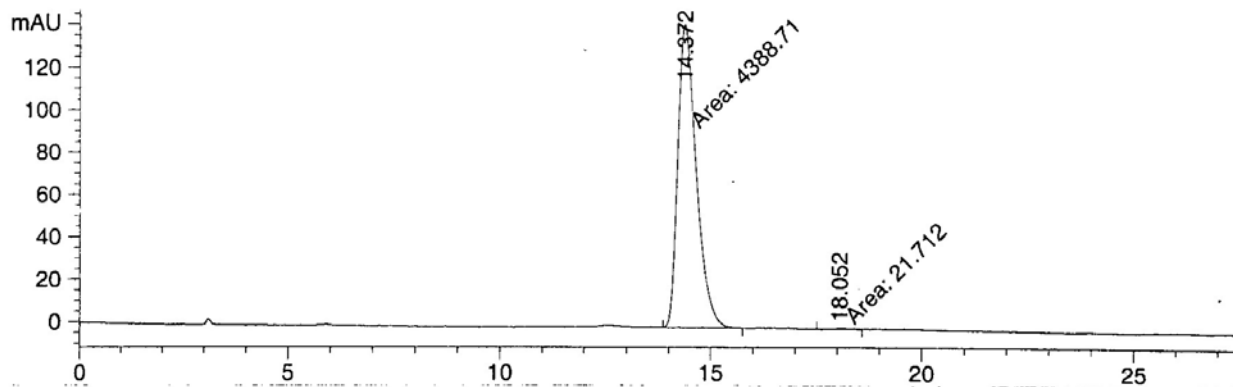

| Peak # | RetTime [min] | Type | Width [min] | Area [mAU*s] | Height [mAU] | Area %  |
|--------|---------------|------|-------------|--------------|--------------|---------|
| 1      | 15.855        | MM   | 0.6453      | 1.28008e4    | 330.62897    | 99.4258 |
| 2      | 22.678        | MM   | 0.5099      | 73.92467     | 2.41642      | 0.5742  |

Totals : 1.28747e4 333.04539



$^1\text{H}$  NMR spectrum of **13** (400 MHz,  $\text{CDCl}_3$ )

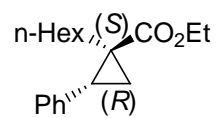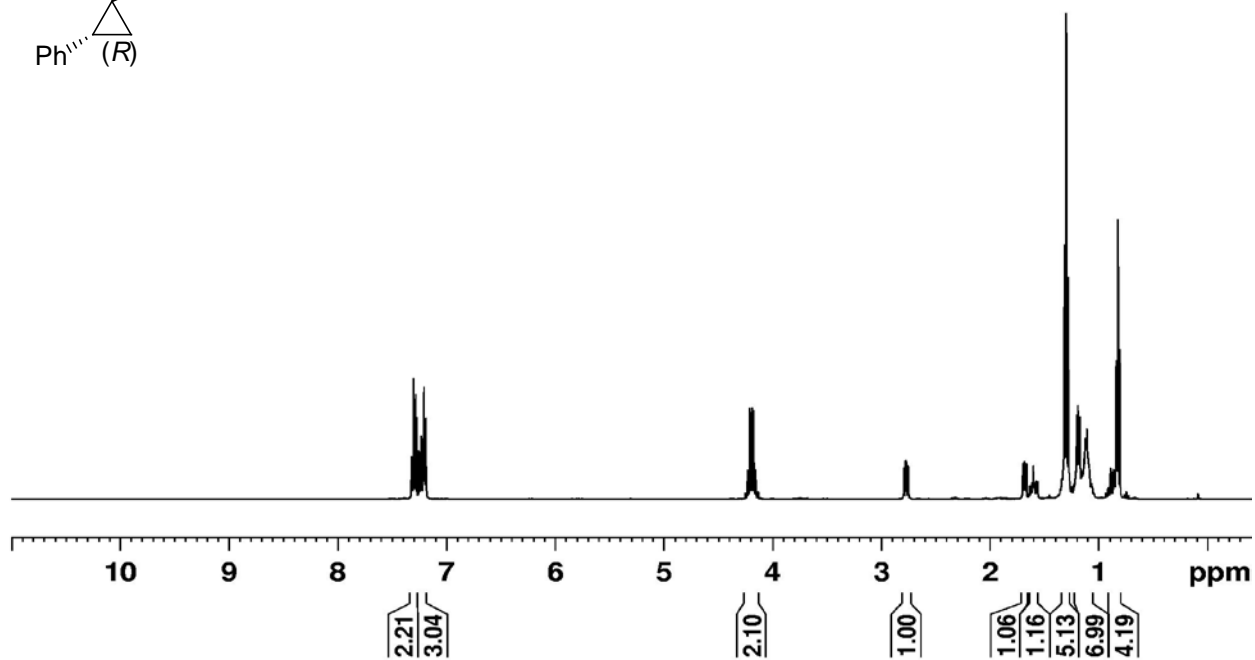

$^{13}\text{C}$  NMR spectrum of **13** (100 MHz,  $\text{CDCl}_3$ )

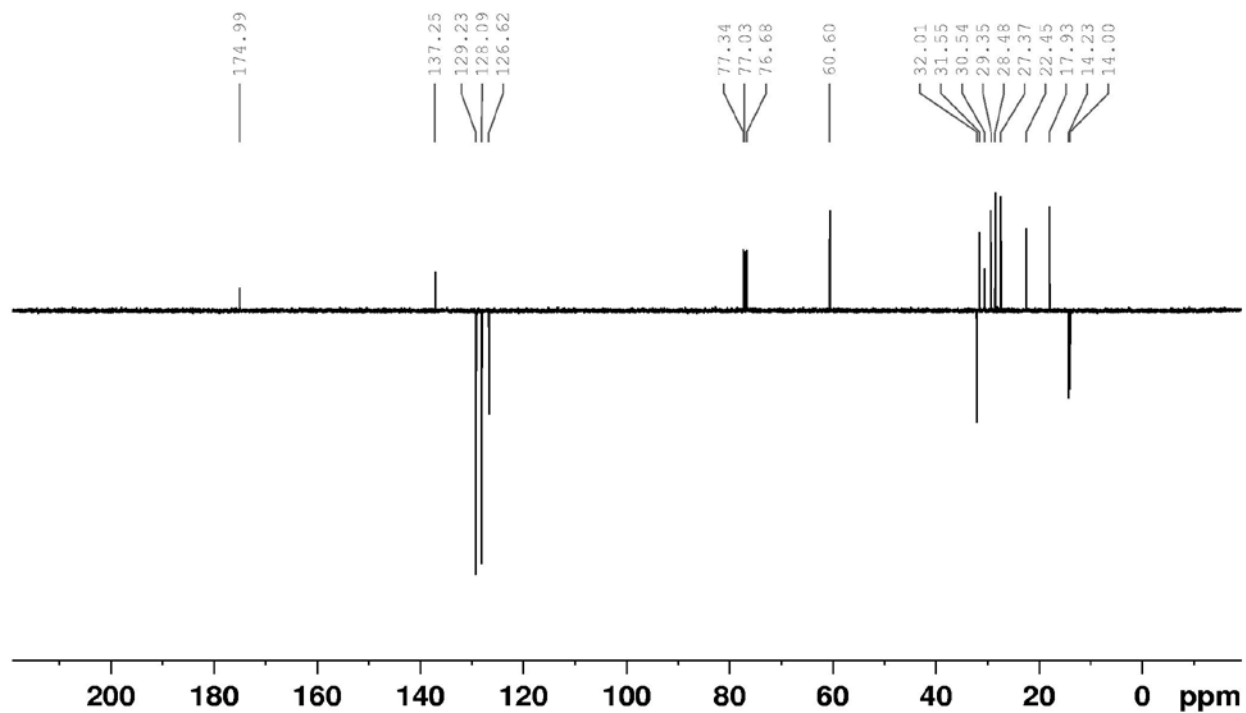

GC trace of **13** (Hewlett Packard HP1 column, 200 °C injection, 50–300 °C over 27 min)

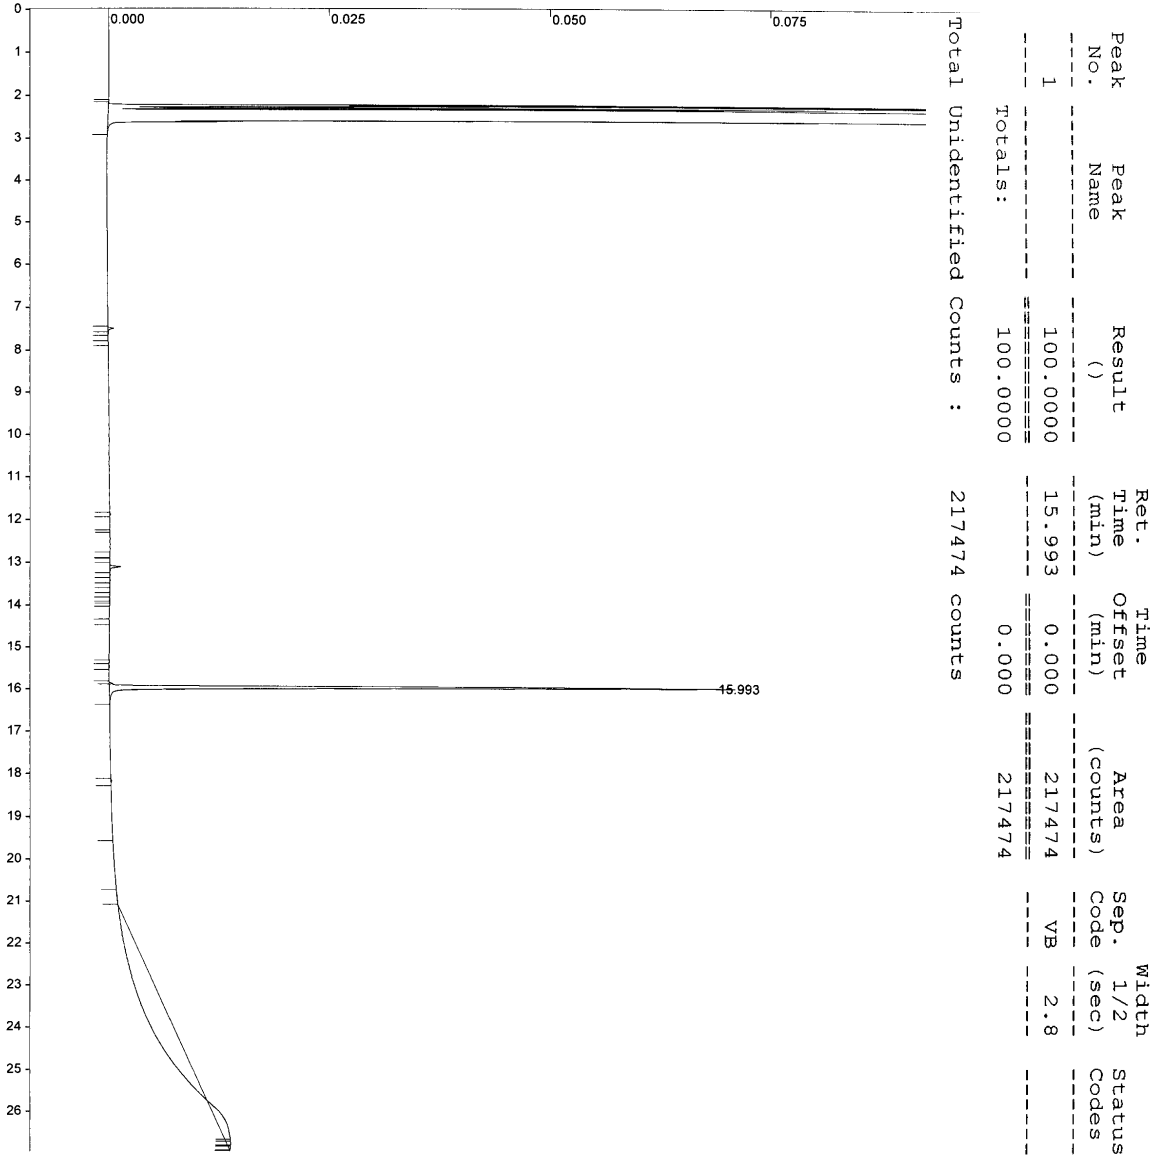

HPLC resolution of racemic **13** (Chiracel OD column, 99.8:0.2 hexanes:isopropanol, 1 mL/min, 220 nm)

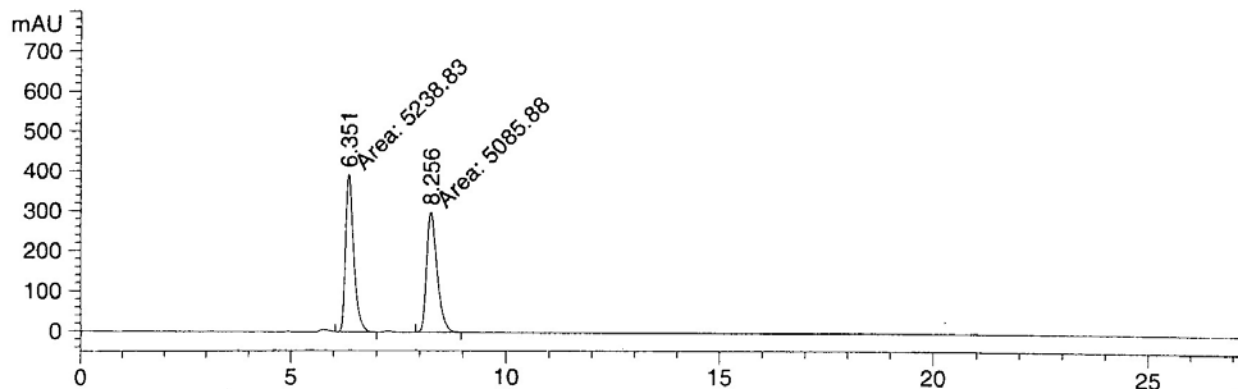

Enantiomeric excess of **13** (Chiracel OD column, 99.8:0.2 hexanes:isopropanol, 1 mL/min, 220 nm)

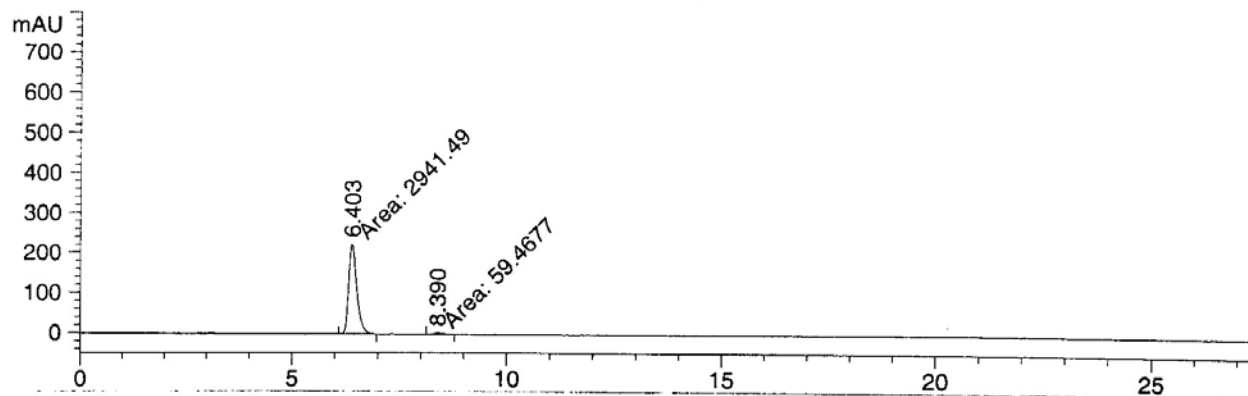

| Peak #   | RetTime [min] | Type | Width [min] | Area [mAU*s] | Height [mAU] | Area %  |
|----------|---------------|------|-------------|--------------|--------------|---------|
| 1        | 6.403         | MM   | 0.2185      | 2941.48560   | 224.41888    | 98.0184 |
| 2        | 8.390         | MM   | 0.2689      | 59.46766     | 3.68621      | 1.9816  |
| Totals : |               |      |             | 3000.95325   | 228.10509    |         |

$^1\text{H}$  NMR spectrum of **15** (400 MHz,  $\text{CDCl}_3$ )

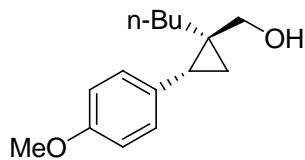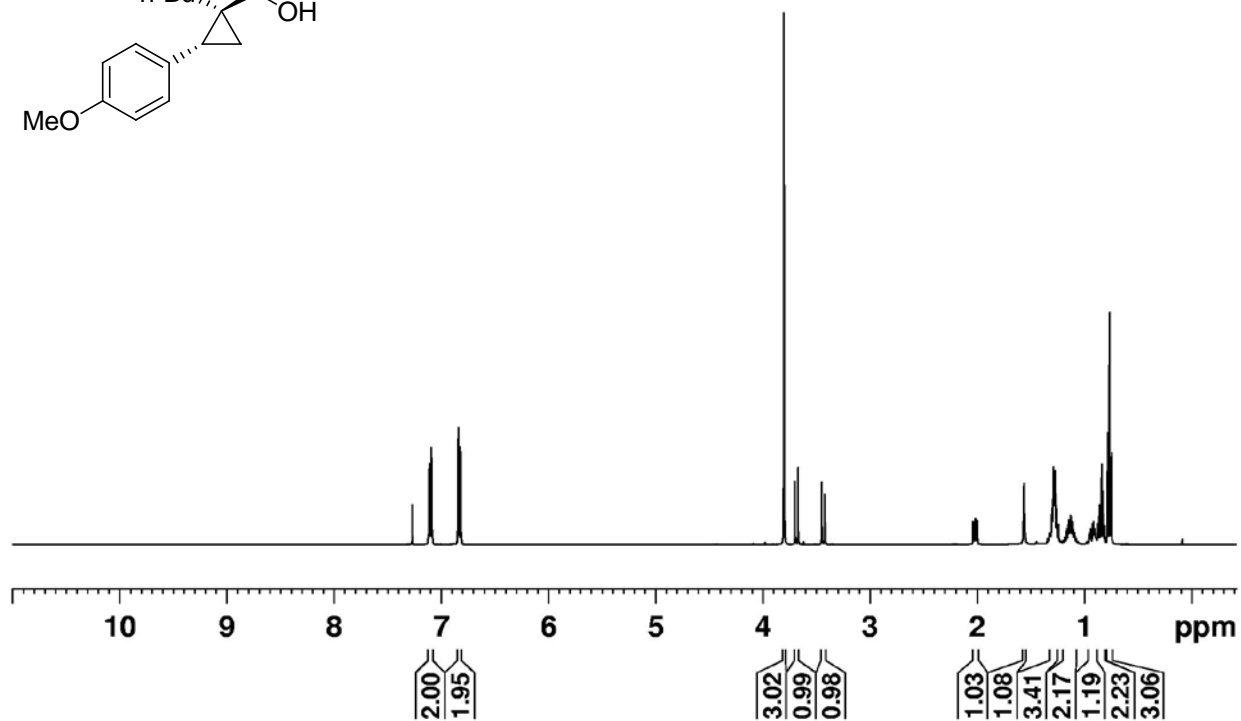

$^{13}\text{C}$  NMR spectrum of **15** (100 MHz,  $\text{CDCl}_3$ )

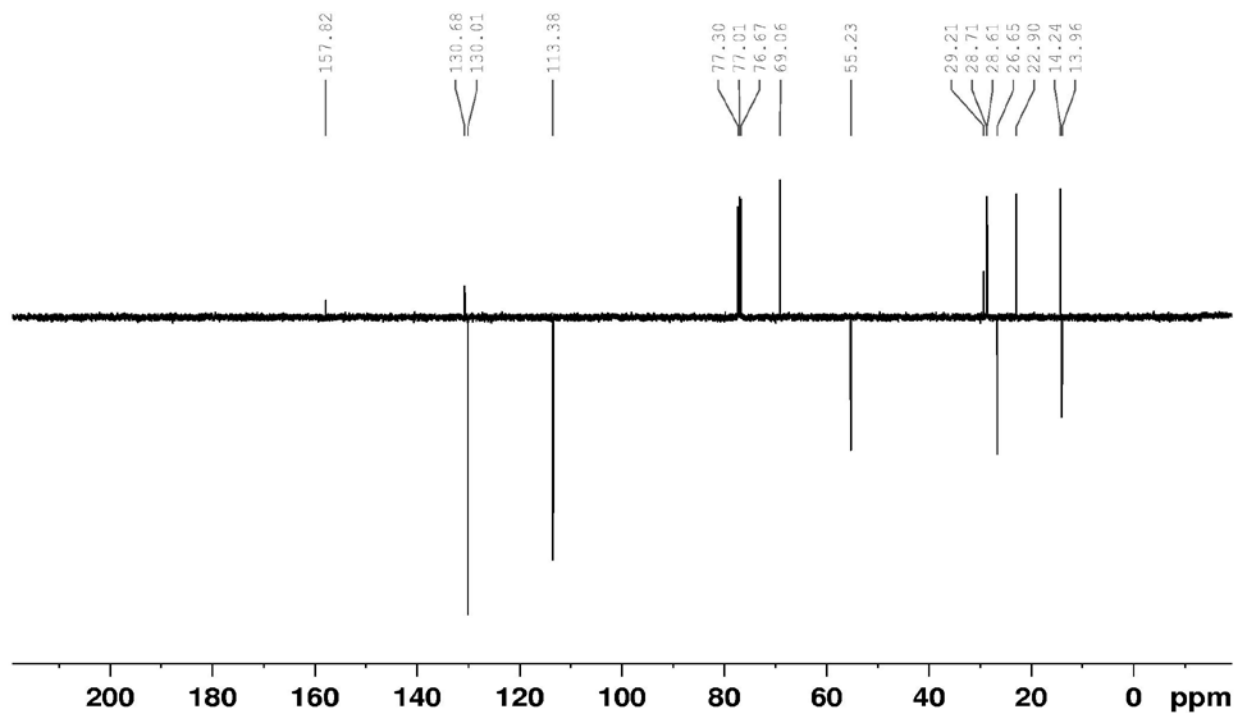

HPLC resolution of **15** (Chiracel OD column, 98:2 hexanes: isopropanol, 1 mL/min, 220 nm)

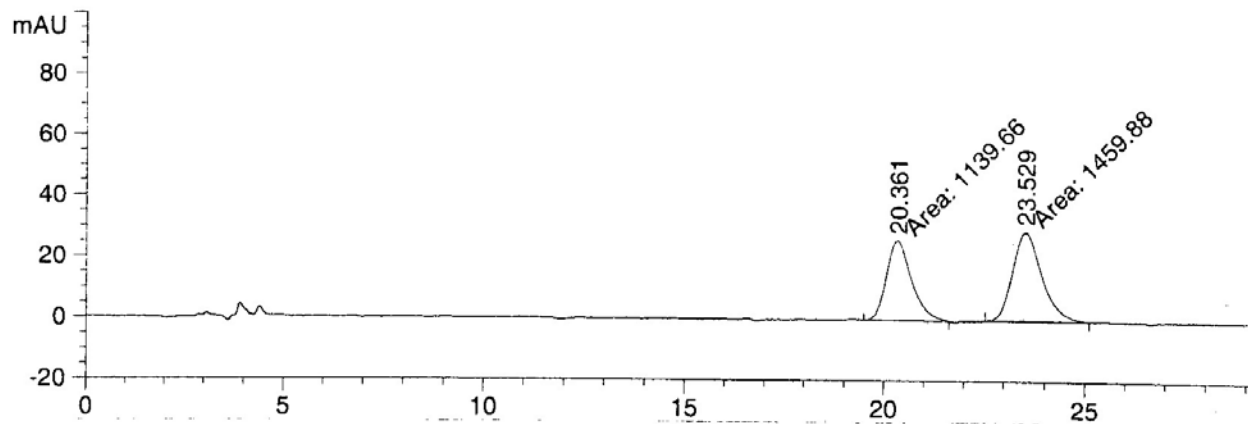

Enantiomeric excess of **15** (Chiracel OD column, 98:2 hexanes: isopropanol, 1 mL/min, 220 nm)

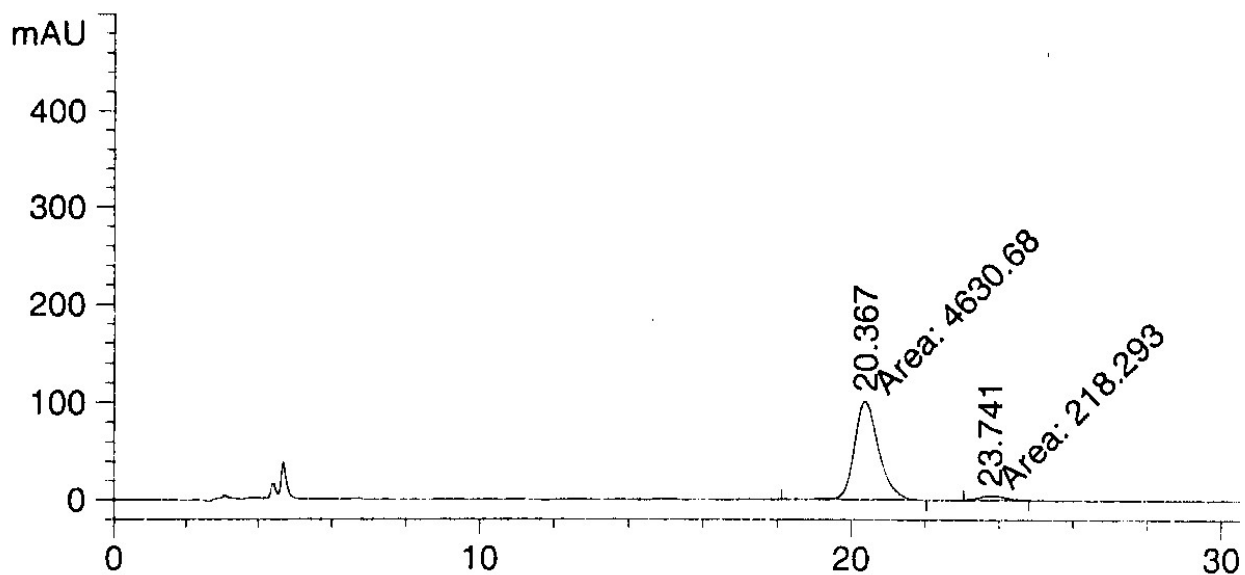

| Peak # | RetTime [min] | Type | Width [min] | Area [mAU*s] | Height [mAU] | Area %  |
|--------|---------------|------|-------------|--------------|--------------|---------|
| 1      | 20.367        | MM   | 0.7635      | 4630.68115   | 101.07853    | 95.4982 |
| 2      | 23.741        | MM   | 0.7717      | 218.29338    | 4.71469      | 4.5018  |

Totals : 4848.97453 105.79322

$^1\text{H}$  NMR spectrum of **16** (400 MHz,  $\text{CDCl}_3$ )

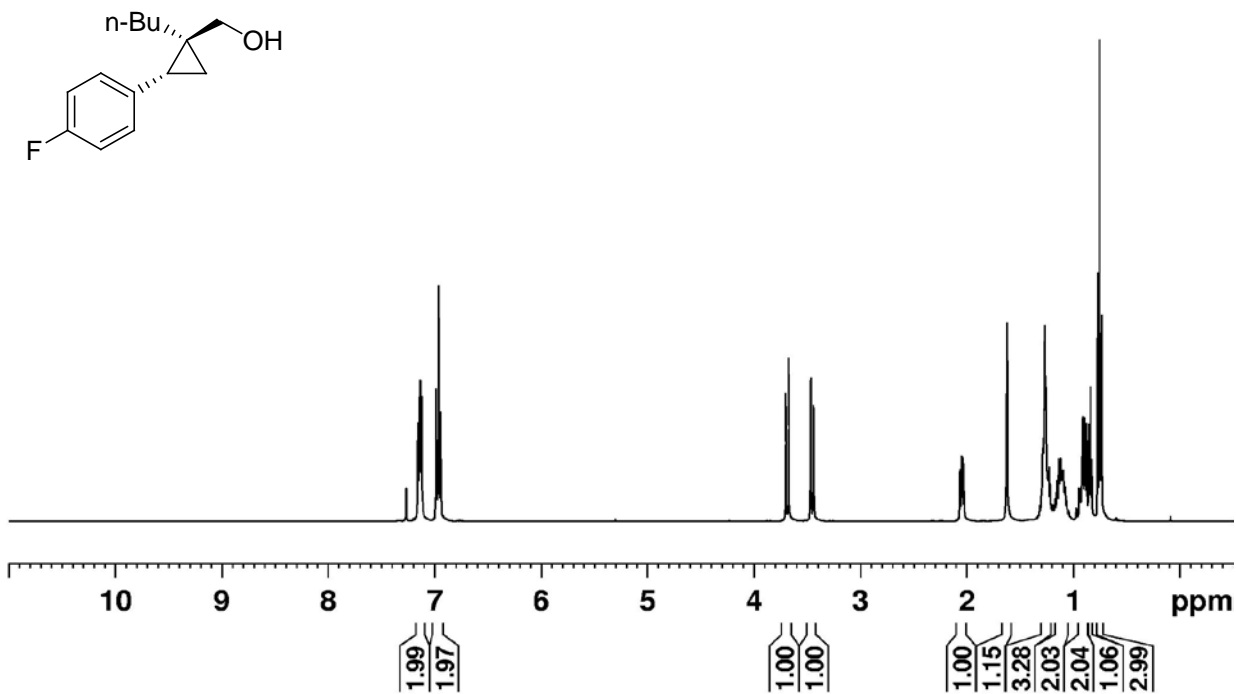

$^{13}\text{C}$  NMR spectrum of **16** (100 MHz,  $\text{CDCl}_3$ )

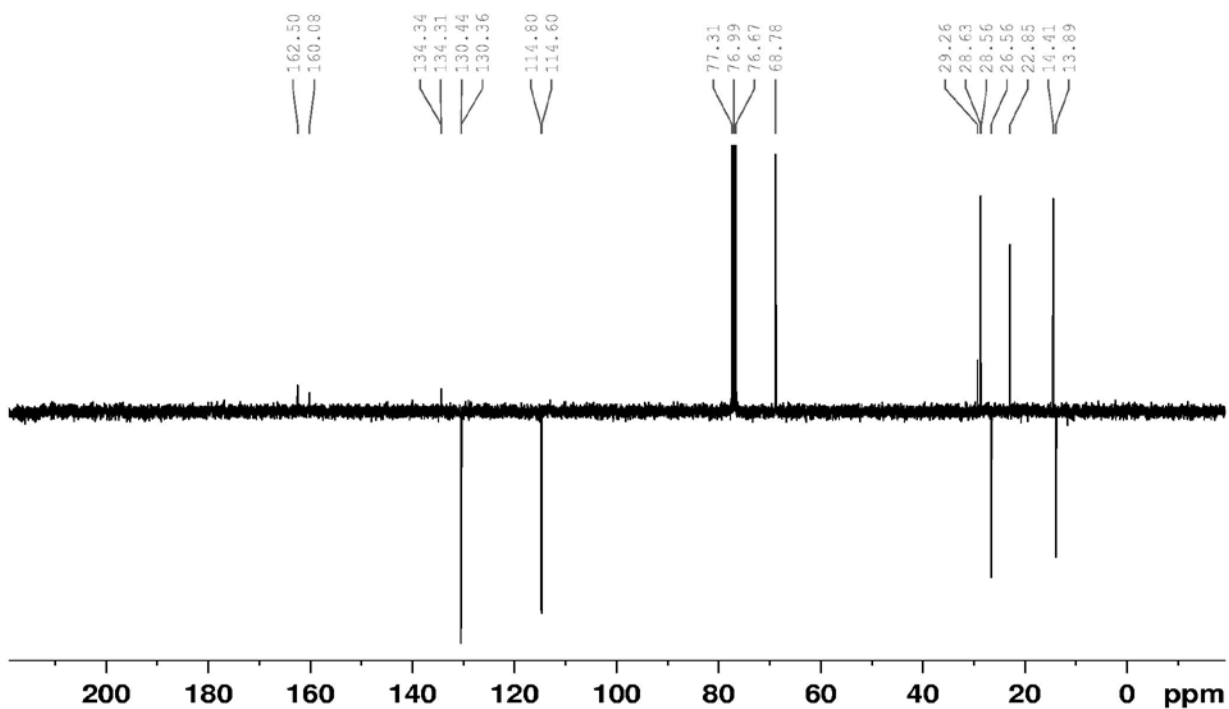

HPLC resolution of **16** (Chiracel OD column, 98:2 hexanes: isopropanol, 1 mL/min, 220 nm)

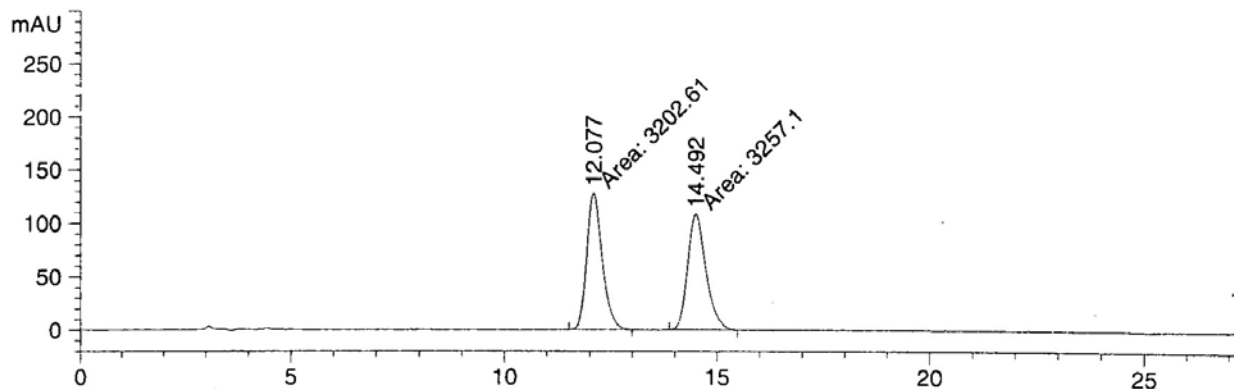

Enantiomeric excess of **16** (Chiracel OD column, 98:2 hexanes: isopropanol, 1 mL/min, 220 nm)

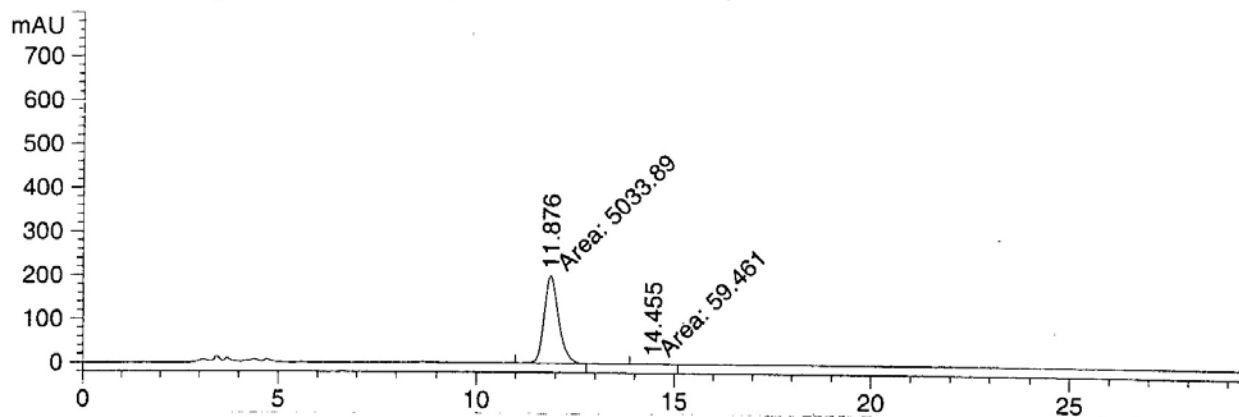

| Peak # | RetTime [min] | Type | Width [min] | Area [mAU*s] | Height [mAU] | Area %  |
|--------|---------------|------|-------------|--------------|--------------|---------|
| 1      | 11.876        | MM   | 0.4204      | 5033.89209   | 199.56914    | 98.8326 |
| 2      | 14.455        | MM   | 0.4605      | 59.46101     | 2.15208      | 1.1674  |

Totals : 5093.35310 201.72121

$^1\text{H}$  NMR spectrum of **17** (400 MHz,  $\text{CDCl}_3$ )

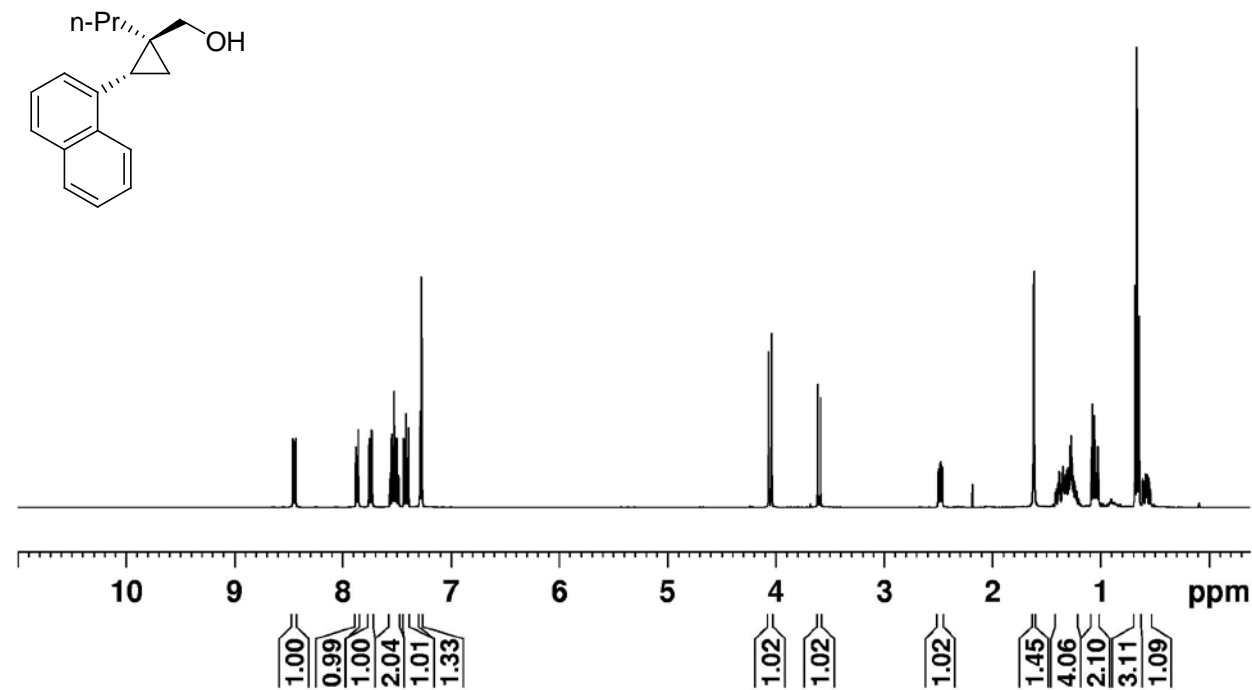

$^{13}\text{C}$  NMR spectrum of **17** (100 MHz,  $\text{CDCl}_3$ )

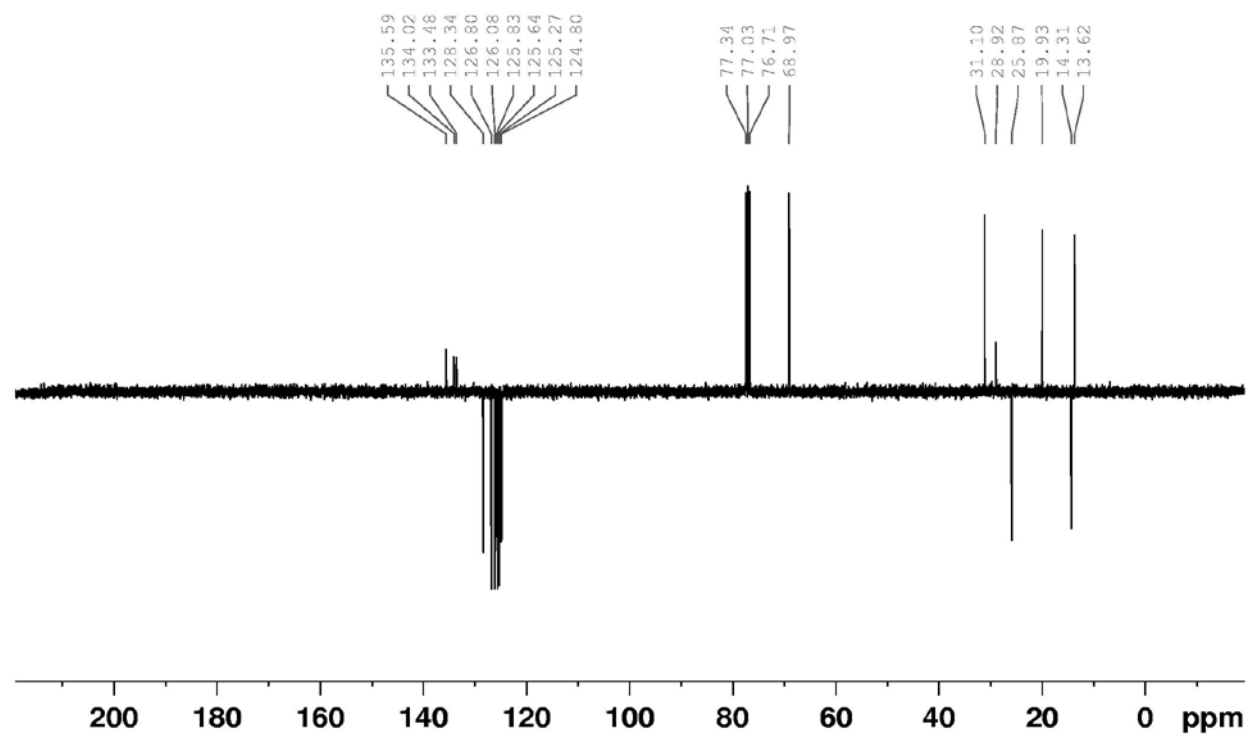



HPLC resolution of **17** (Chiracel OD column, 98:2 hexanes:isopropanol, 1 mL/min, 220 nm)

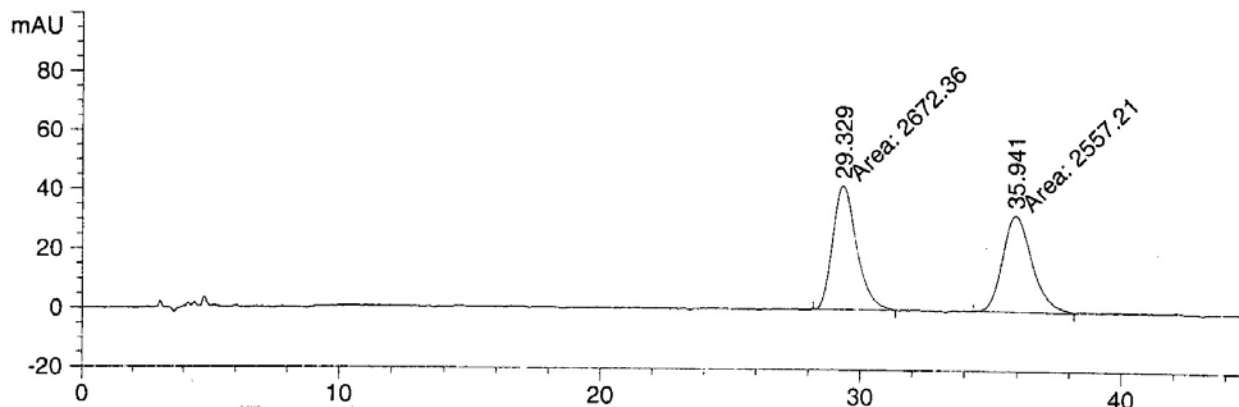

Enantiomeric excess of **17** (Chiracel OD column, 98:2 hexanes:isopropanol, 1 mL/min, 220 nm)

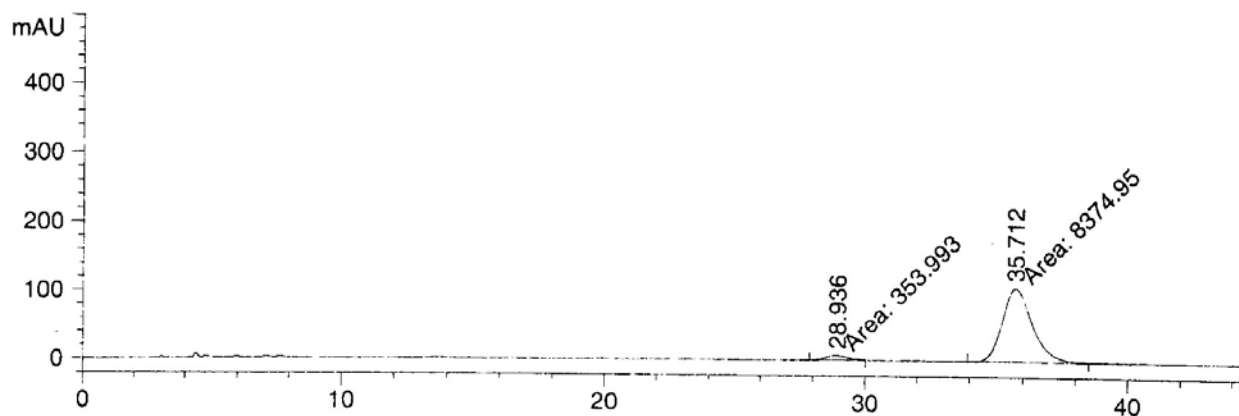

| Peak # | RetTime [min] | Type | Width [min] | Area [mAU*s] | Height [mAU] | Area %  |
|--------|---------------|------|-------------|--------------|--------------|---------|
| 1      | 28.936        | MM   | 0.9475      | 353.99332    | 6.22671      | 4.0554  |
| 2      | 35.712        | MM   | 1.3106      | 8374.94531   | 106.50576    | 95.9446 |

Totals : 8728.93863 112.73247

$^1\text{H}$  NMR spectrum of **18** (400 MHz,  $\text{CDCl}_3$ )

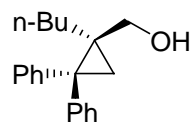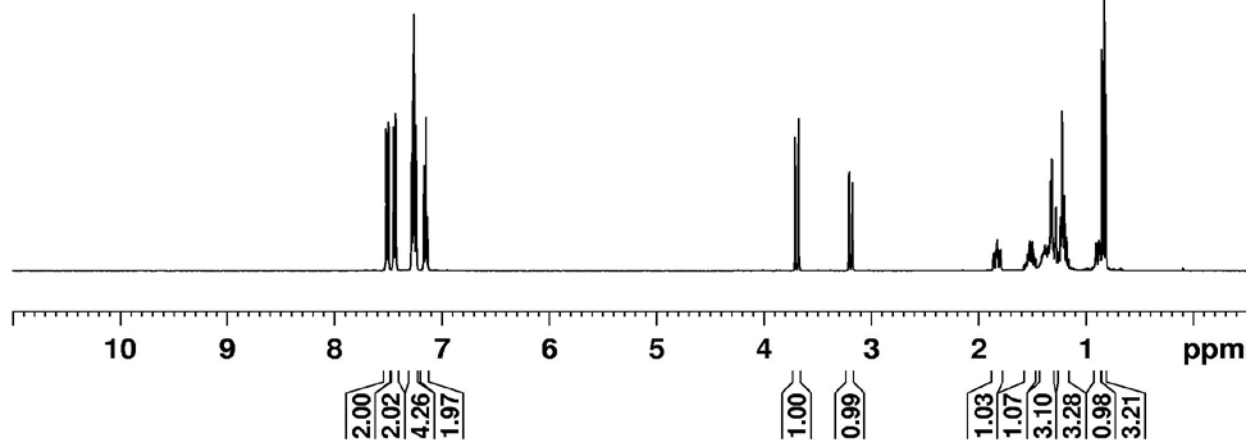

$^{13}\text{C}$  NMR spectrum of **18** (100 MHz,  $\text{CDCl}_3$ )

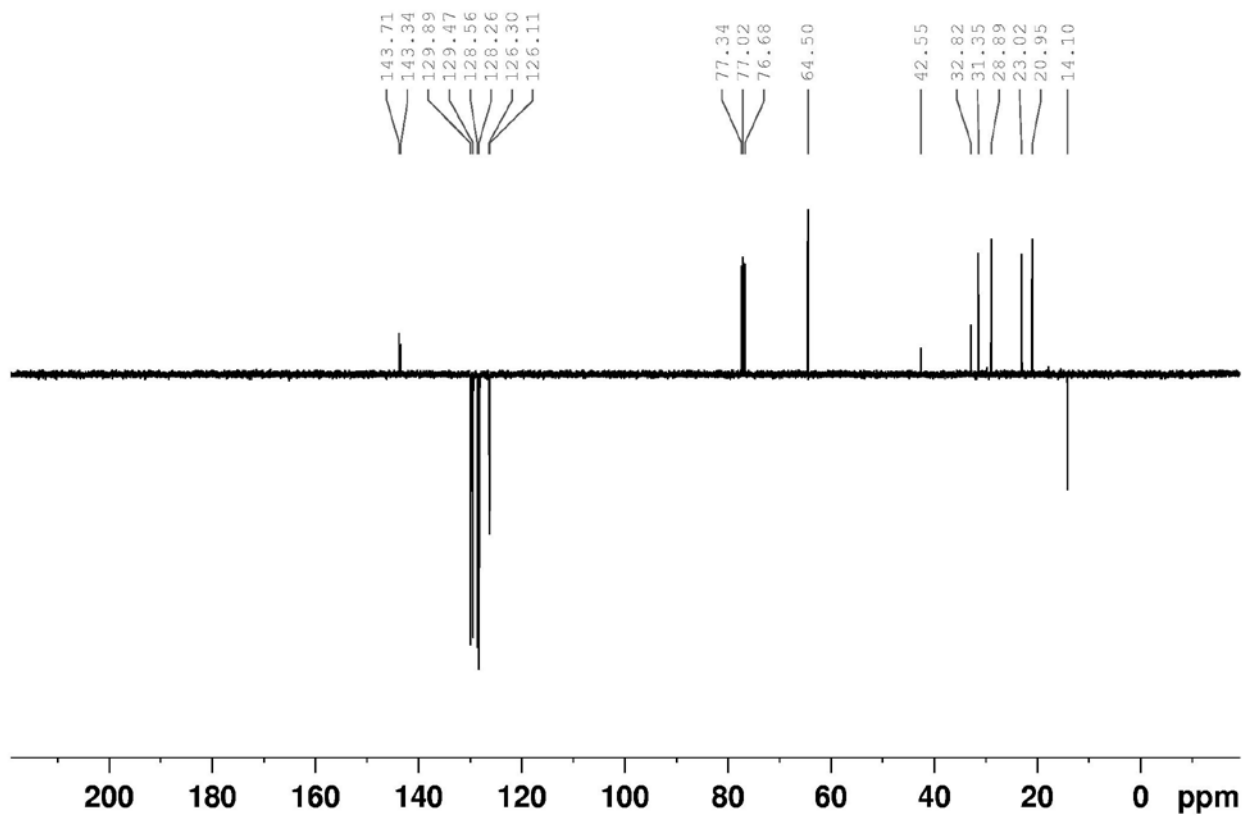

HPLC resolution of racemic **18** (Chiracel OD column, 98:2 hexanes:isopropanol, 1 mL/min, 220 nm)

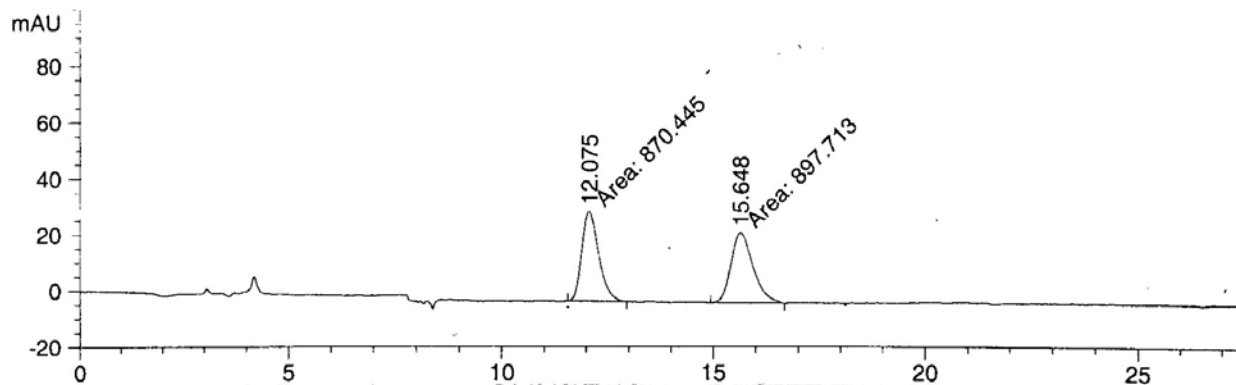

Enantiomeric excess of **18** (Chiracel OD column, 98:2 hexanes:isopropanol, 1 mL/min, 220 nm)

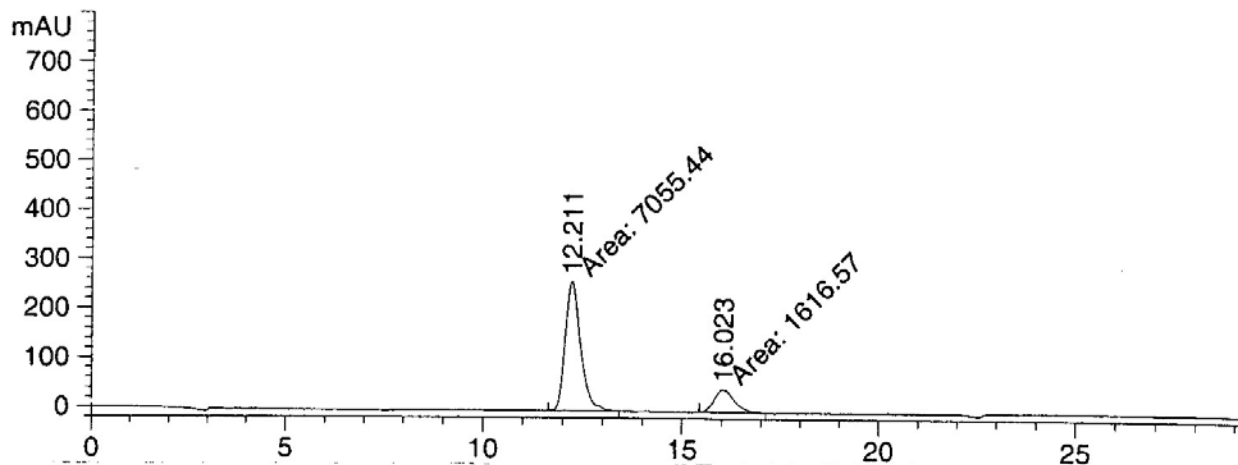

| Peak # | RetTime [min] | Type | Width [min] | Area [mAU*s] | Height [mAU] | Area %  |
|--------|---------------|------|-------------|--------------|--------------|---------|
| 1      | 12.211        | MM   | 0.4514      | 7055.43994   | 260.53018    | 81.3588 |
| 2      | 16.023        | MM   | 0.5945      | 1616.56519   | 45.31838     | 18.6412 |

Totals : 8672.00513 305.84856

$^1\text{H}$  NMR spectrum of **19** (400 MHz,  $\text{CDCl}_3$ ) (97% purity)

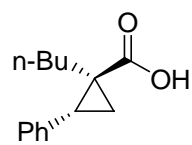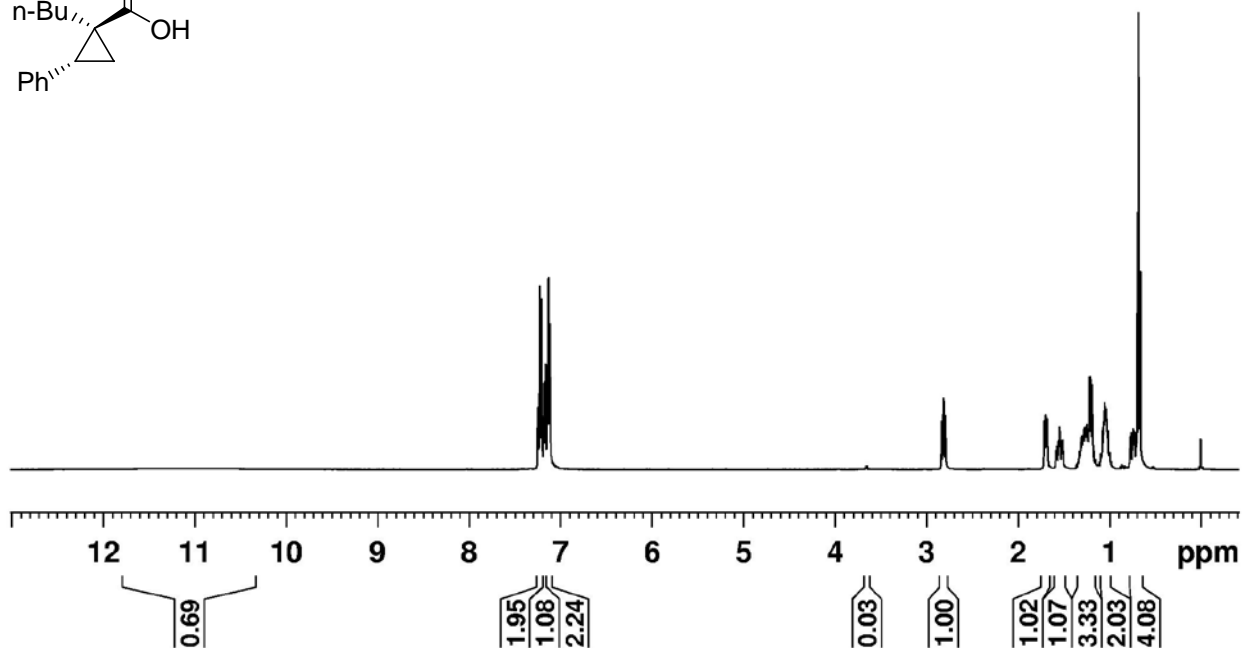

$^{13}\text{C}$  NMR spectrum of **19** (100 MHz,  $\text{CDCl}_3$ ) (97% purity)

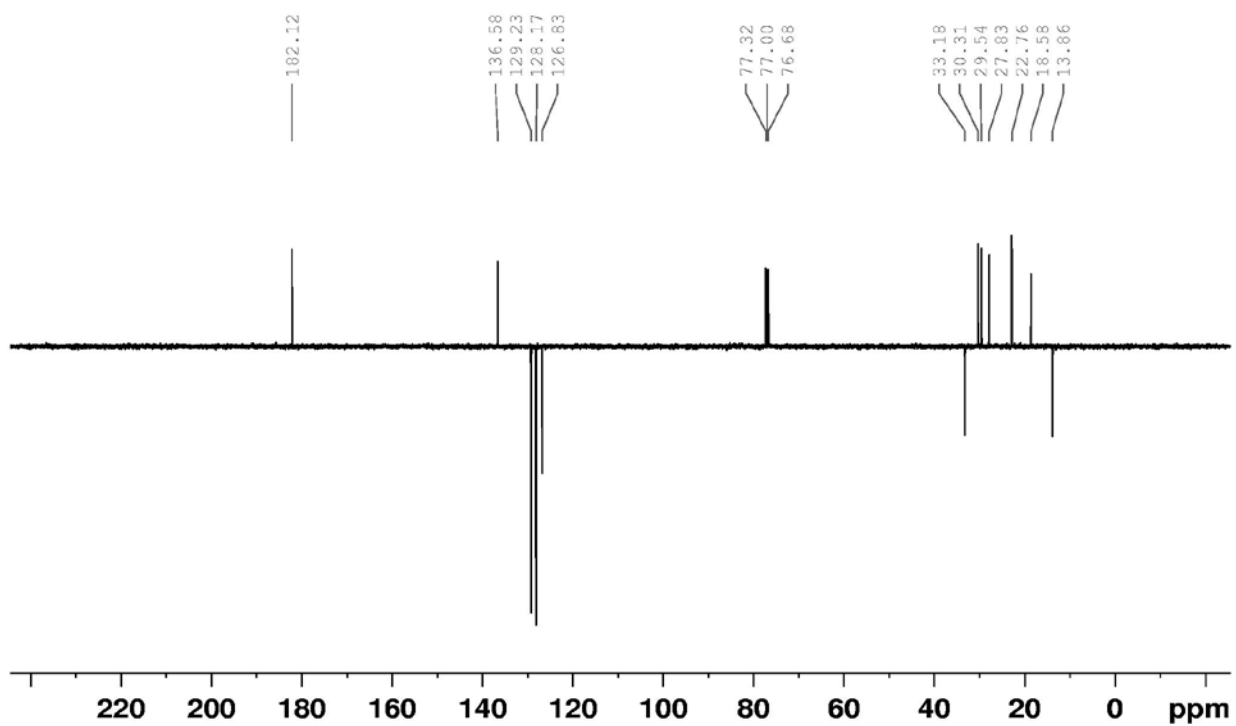

$^1\text{H}$  NMR spectrum of **20** (400 MHz,  $\text{CDCl}_3$ ) (90% purity)

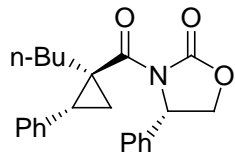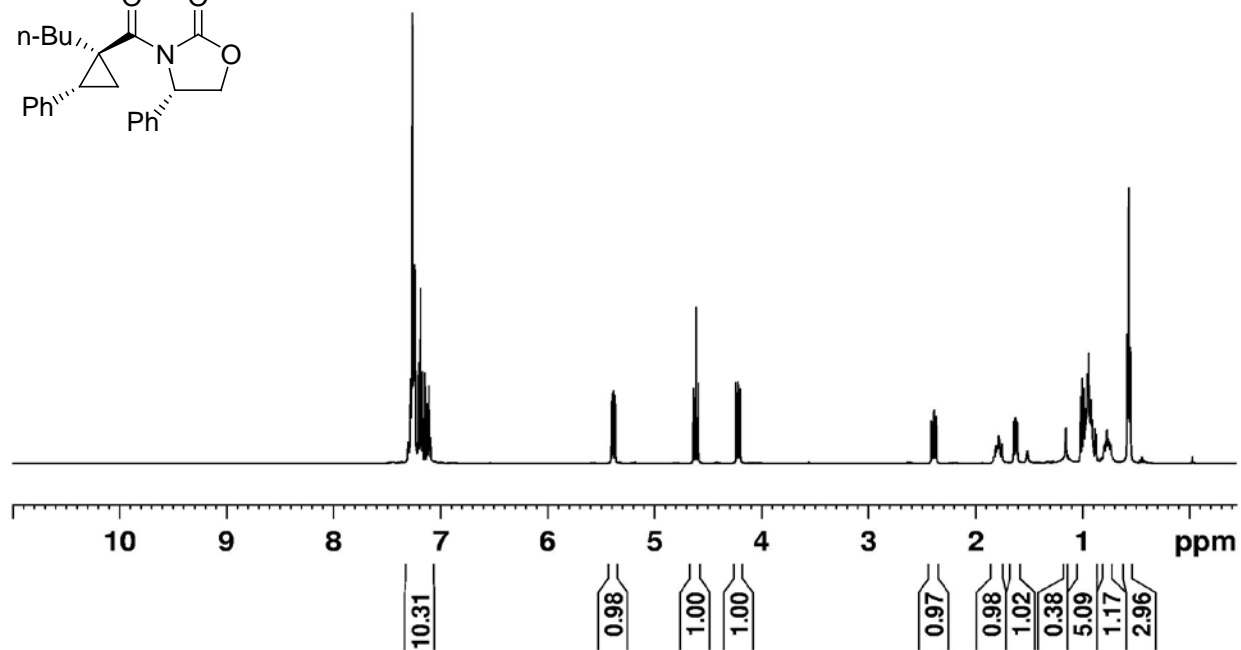

$^{13}\text{C}$  NMR spectrum of **20** (100 MHz,  $\text{CDCl}_3$ ) (90% purity)

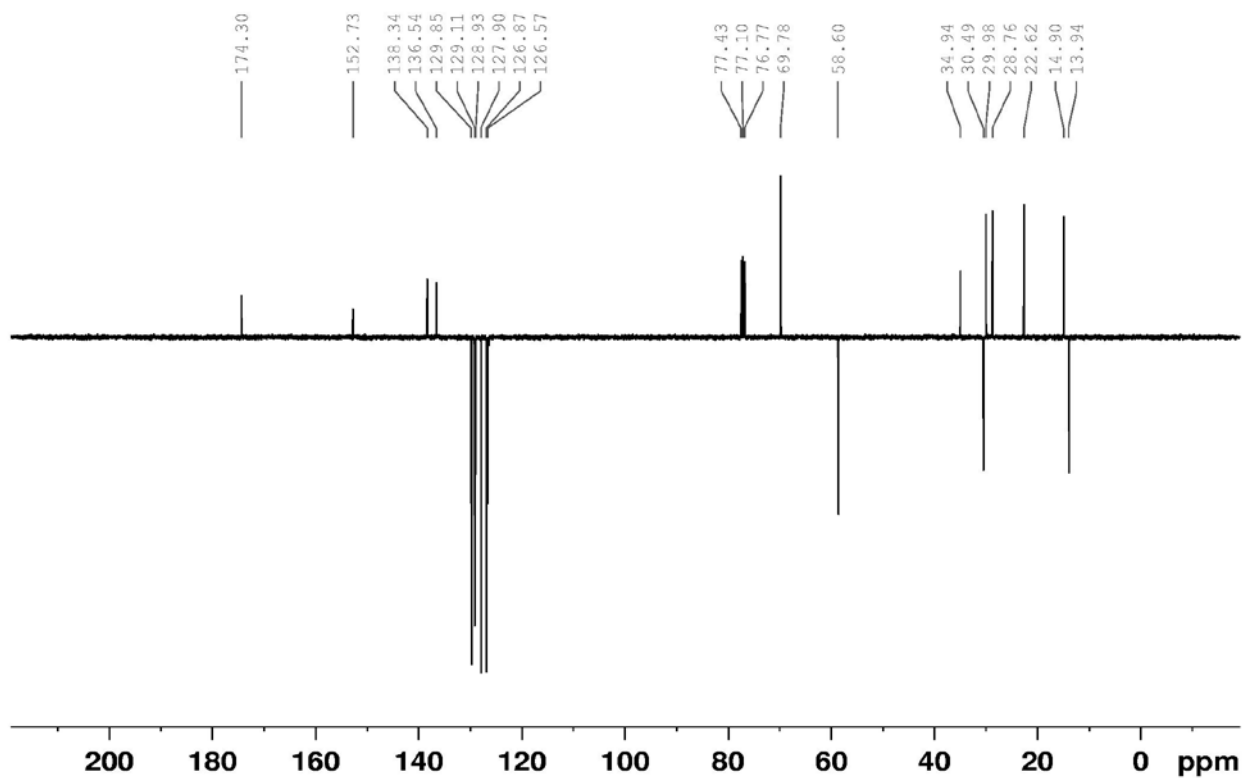

## References

- <sup>1</sup> Taber, D. F.; Sheth, R. B.; Joshi, P. V. *J. Org. Chem.* **2005**, *70*, 2851.
- <sup>2</sup> Okamoto, T.; Kobayashi, K.; Oka, S.; Tanimoto, S. *J. Org. Chem.* **1988**, *53*, 4897.
- <sup>3</sup> Hashimoto, S., Watanabe, N., Ikegami, S., *Tetrahedron Lett.* **1992**, *33*, 2709.
- <sup>4</sup> Tsutsui, H.; Abe, T.; Nakamura, S.; Anada, M.; Hashimoto, S. *Chem. Pharm. Bull.* **2005**, *10*, 1366-1368.
- <sup>5</sup> Panne, P.; DeAngelis, A.; Fox, J. M. *Org. Lett.* **2008**, *10*, 2987
